# Supplementary material
Source: PubMed Central journal article supplement (PMC9949365)

Figure 2  
Panel A

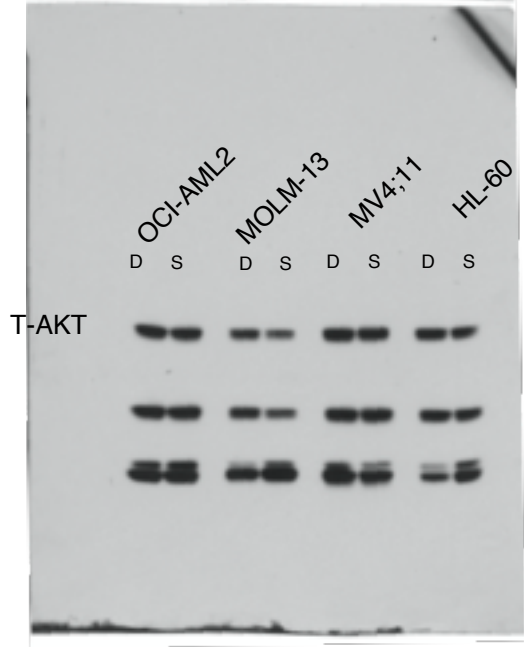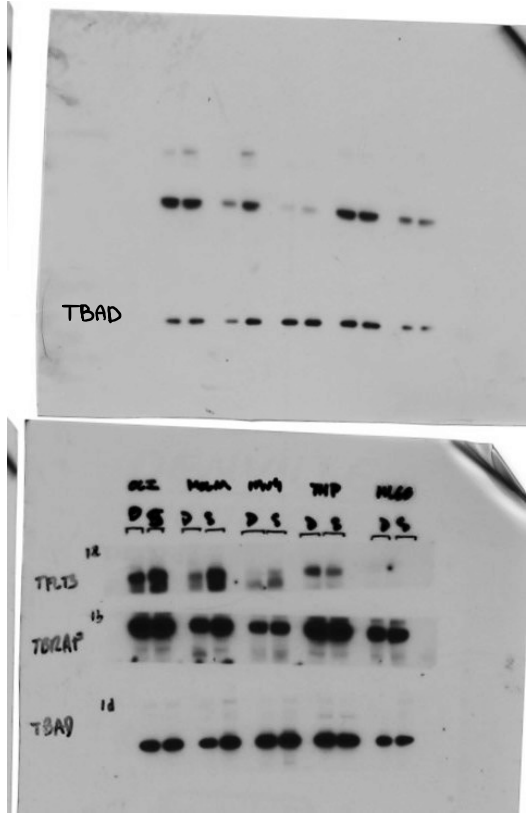

Panel A

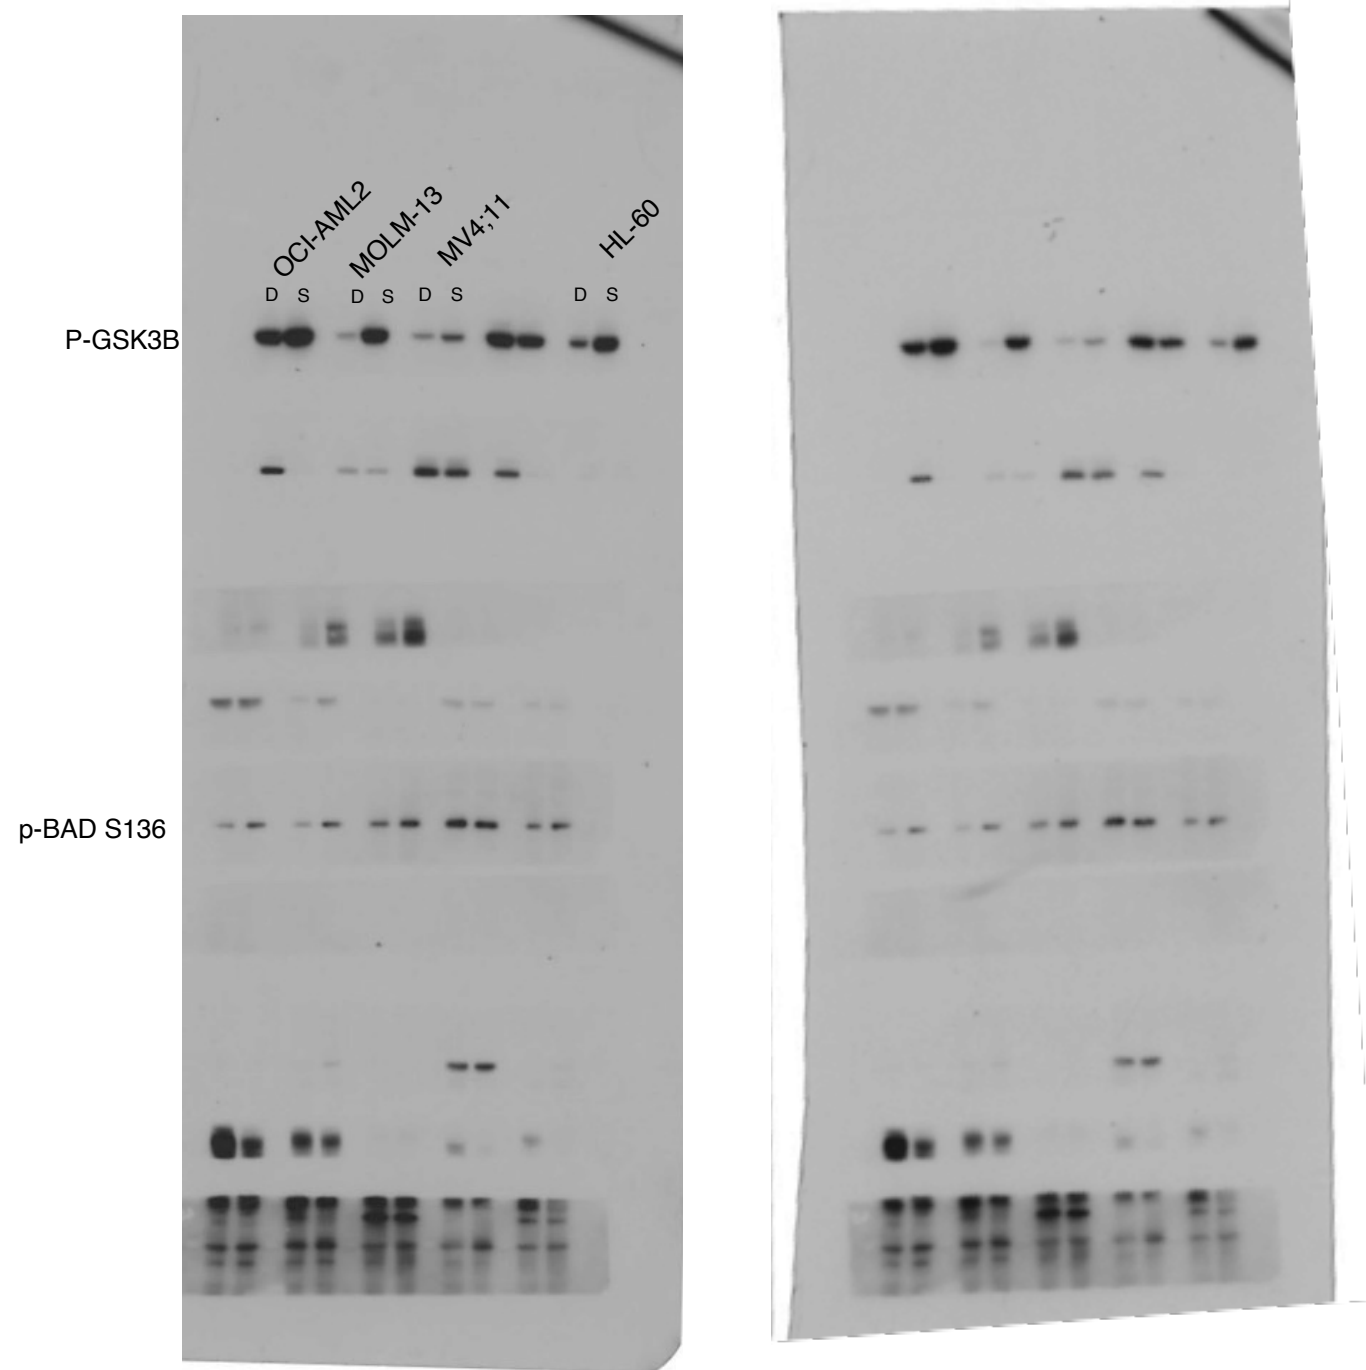

4

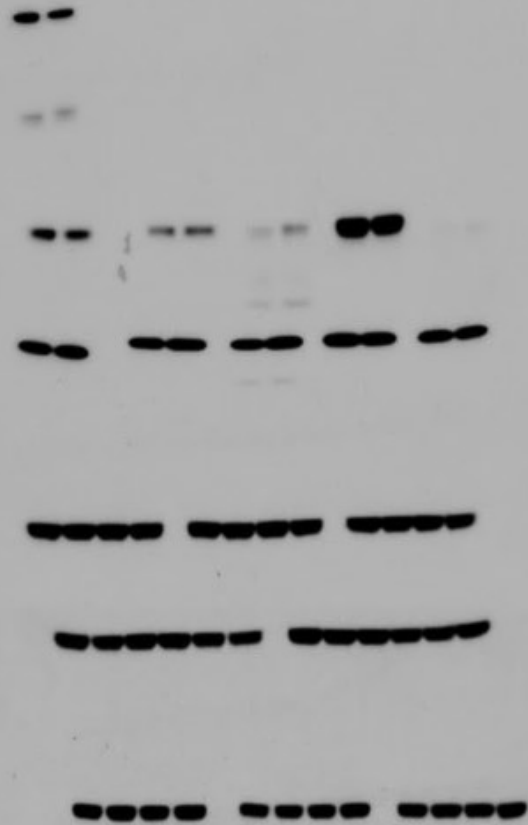

3

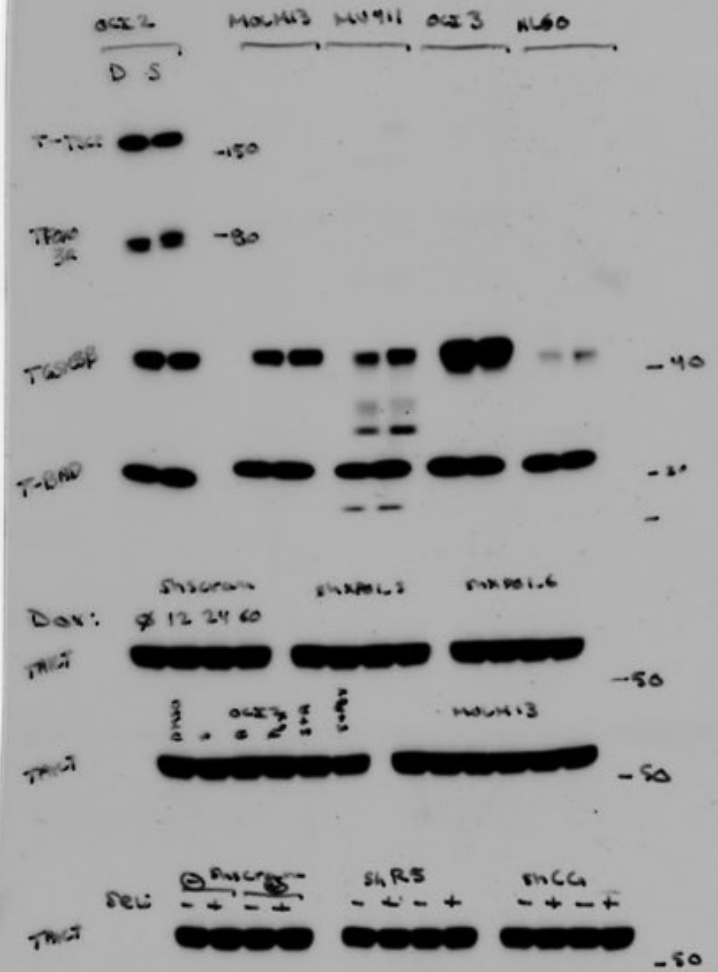

Panel A

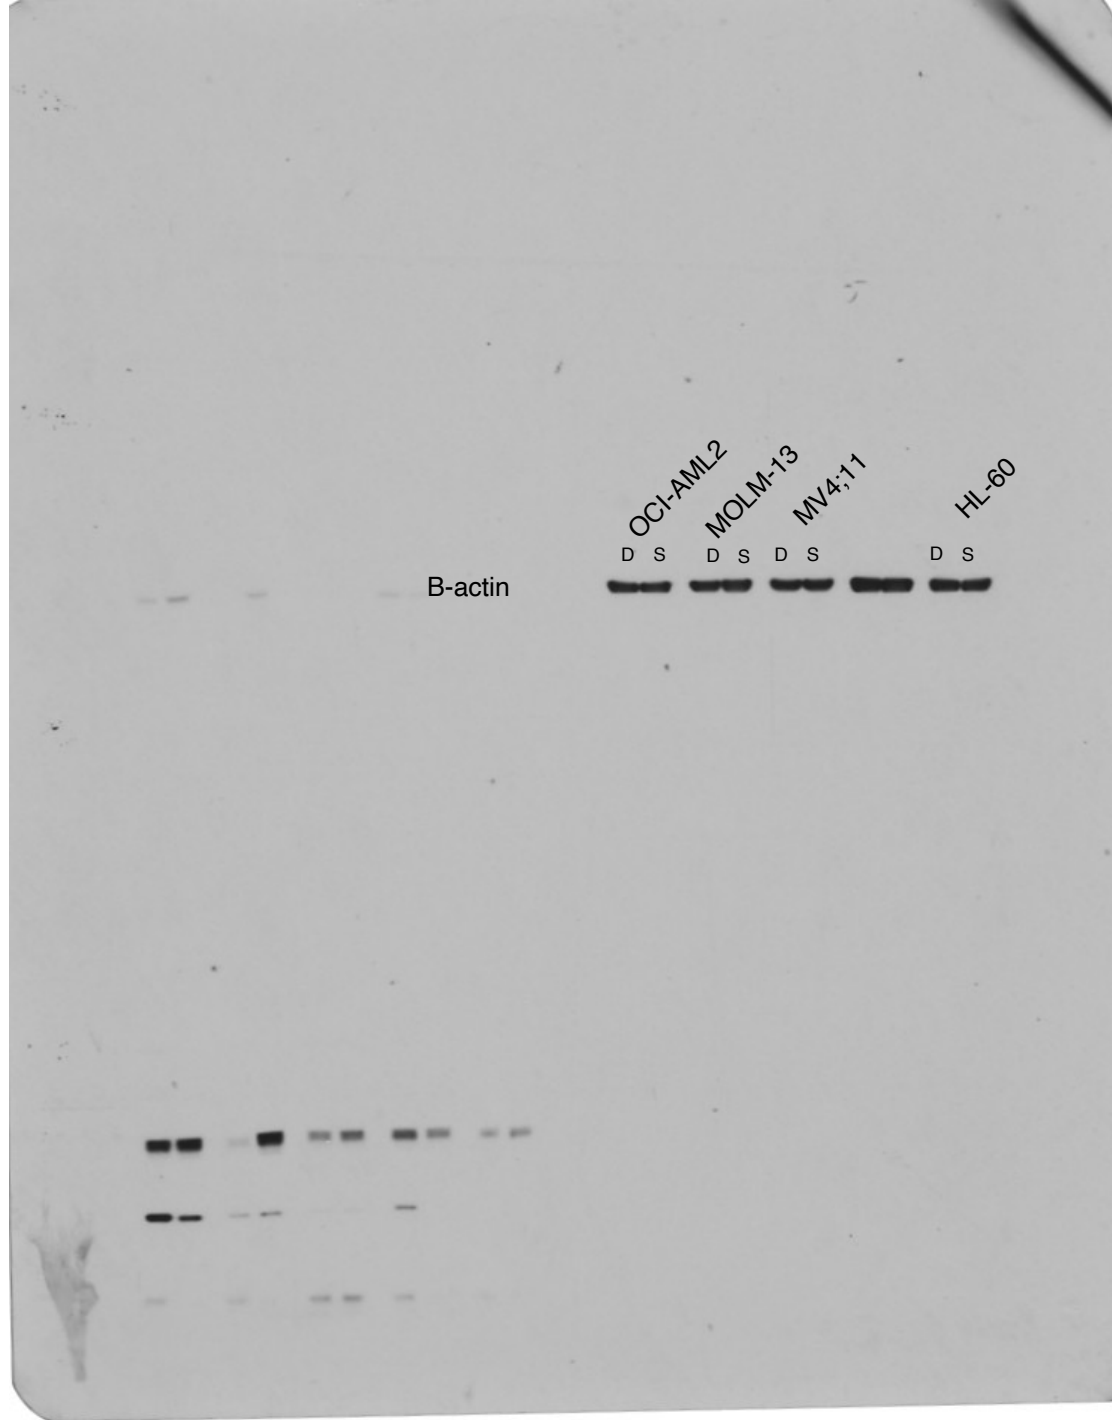

Panel A

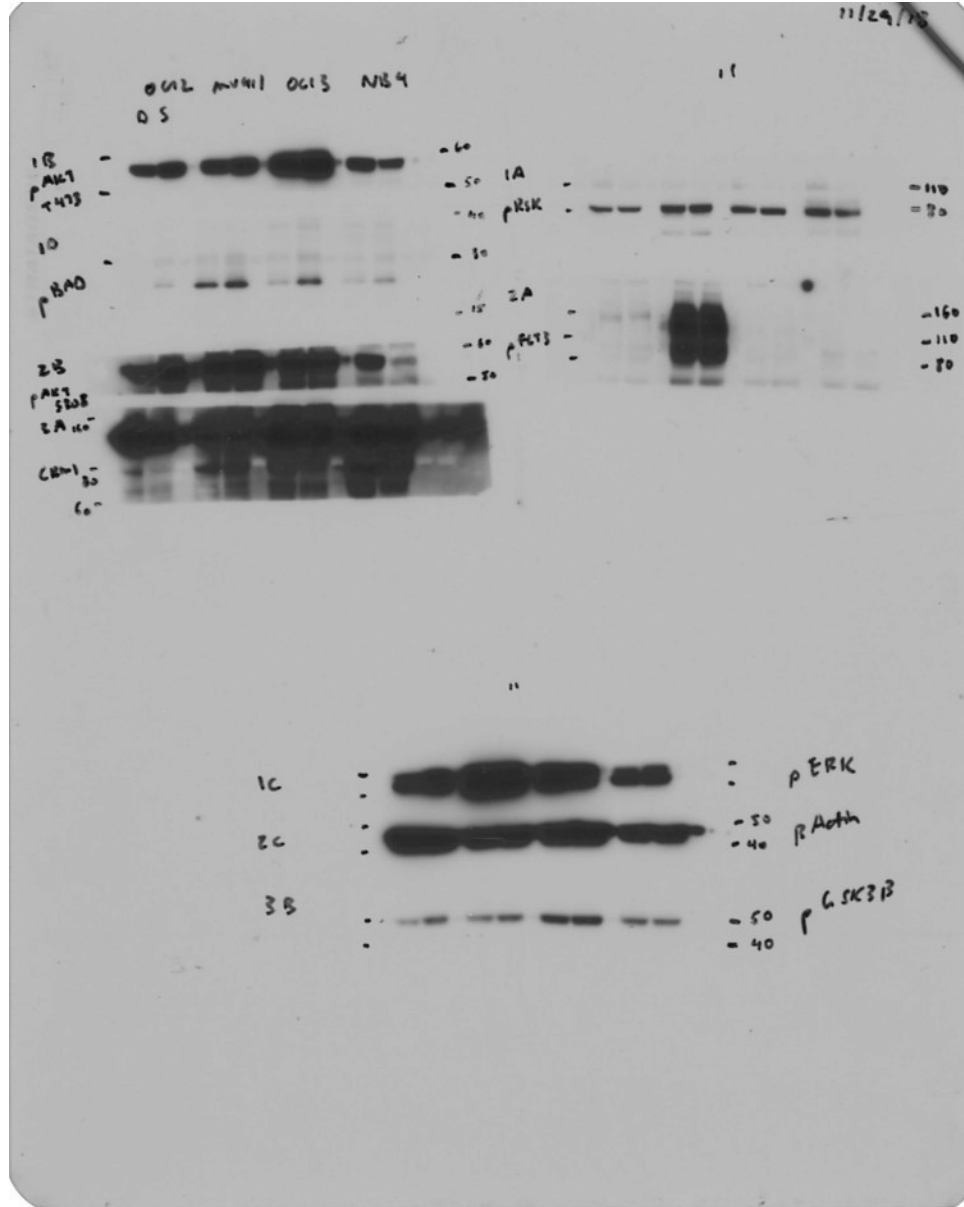

Panel A

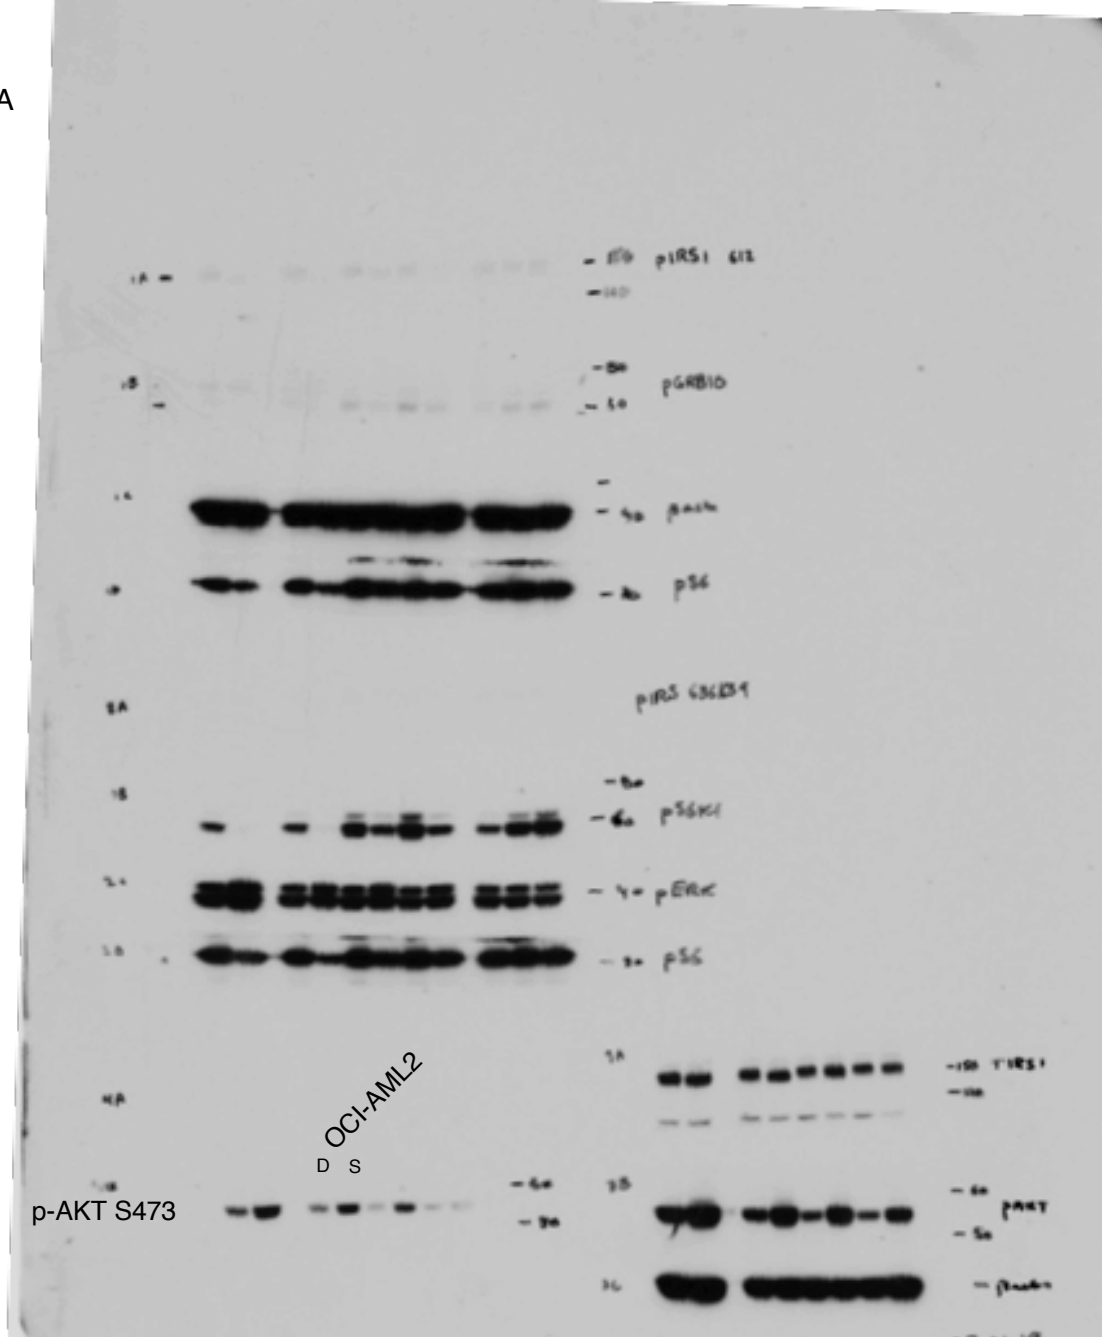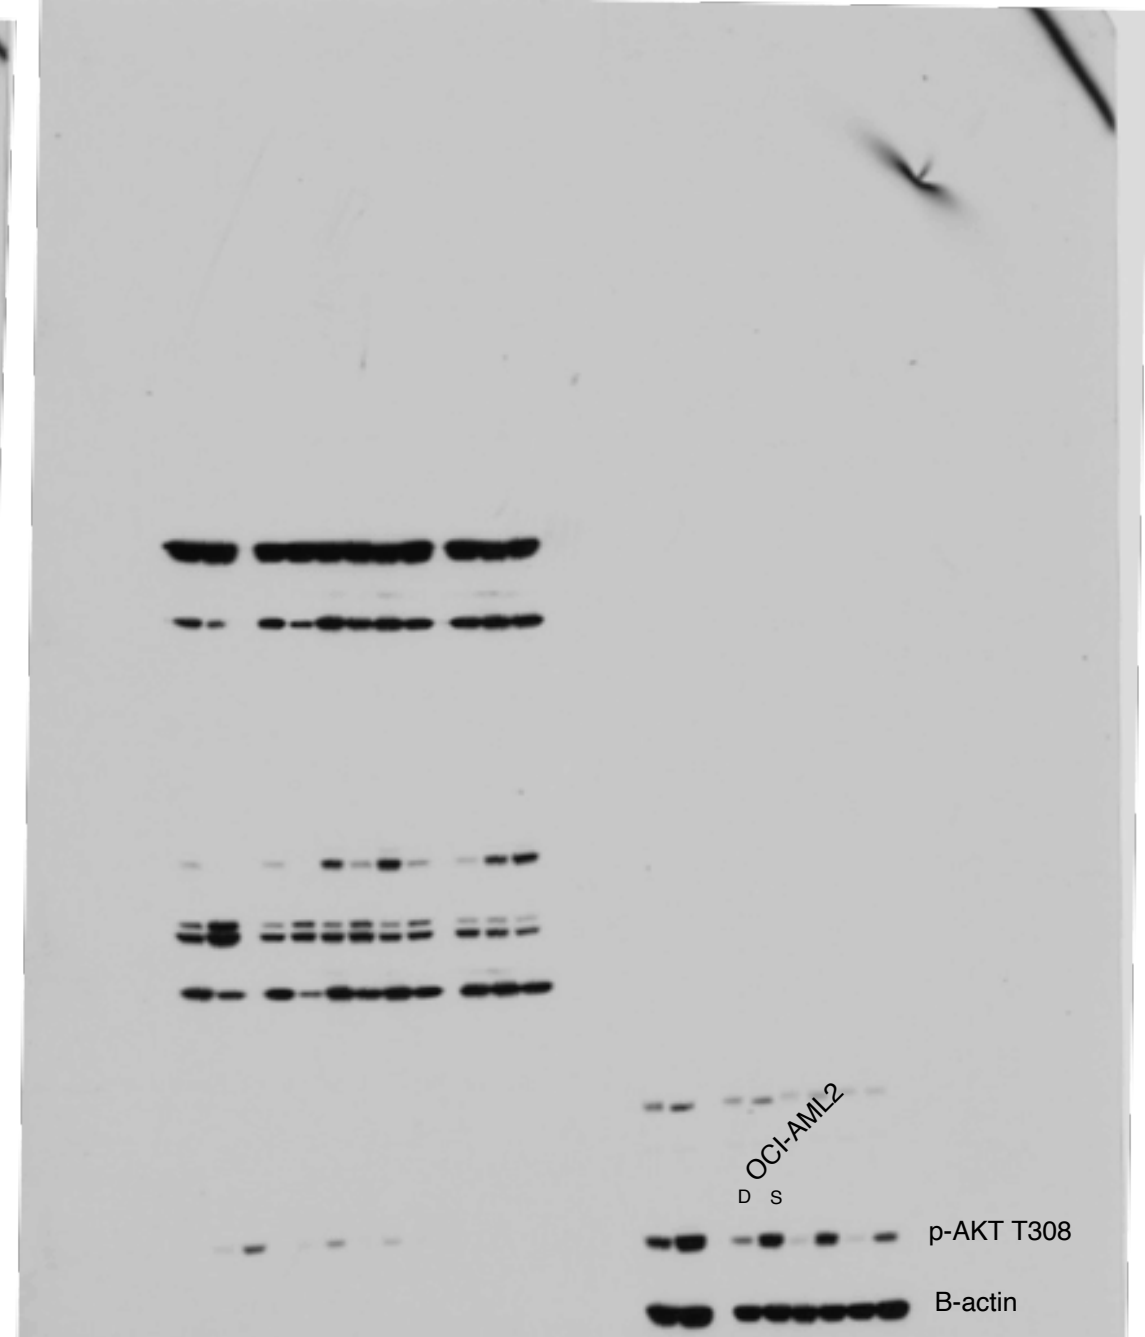

Panel A

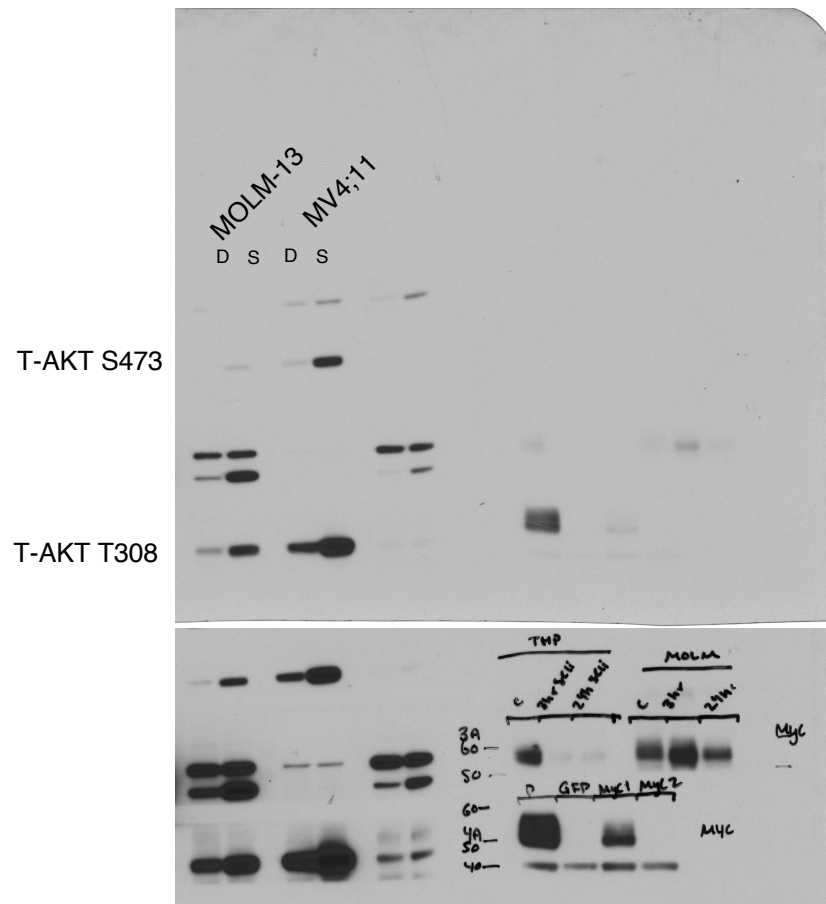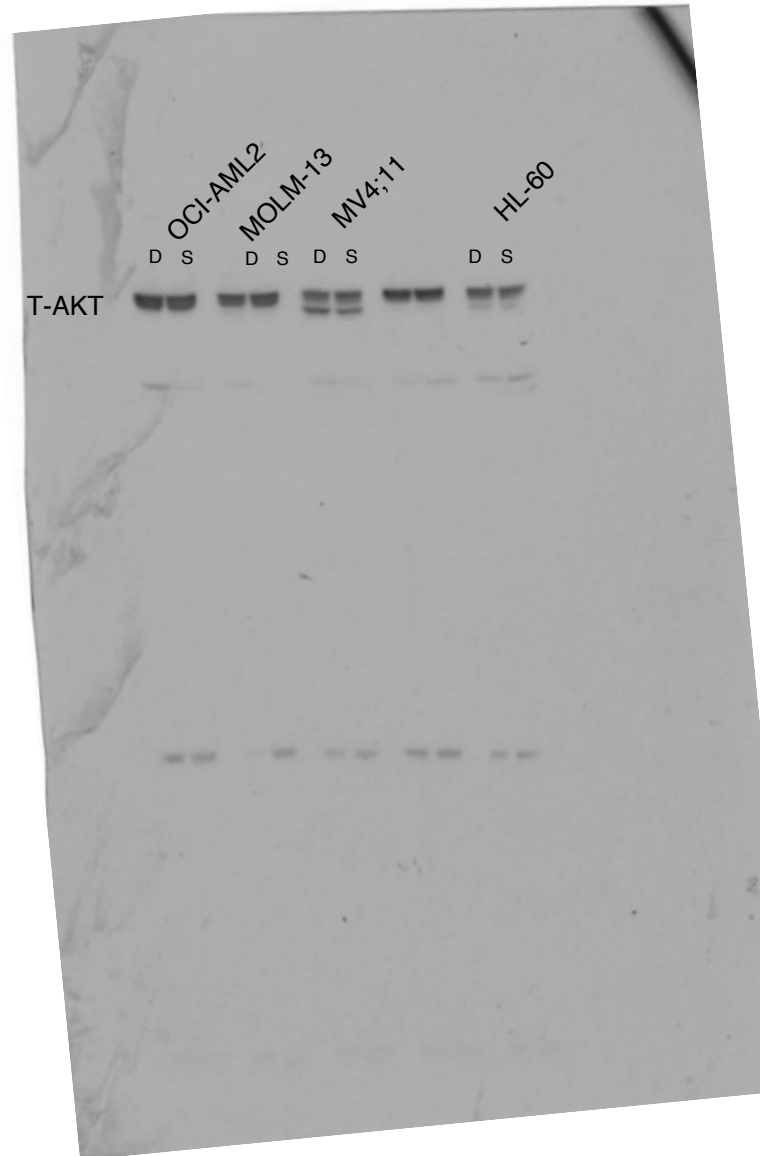

Panel A

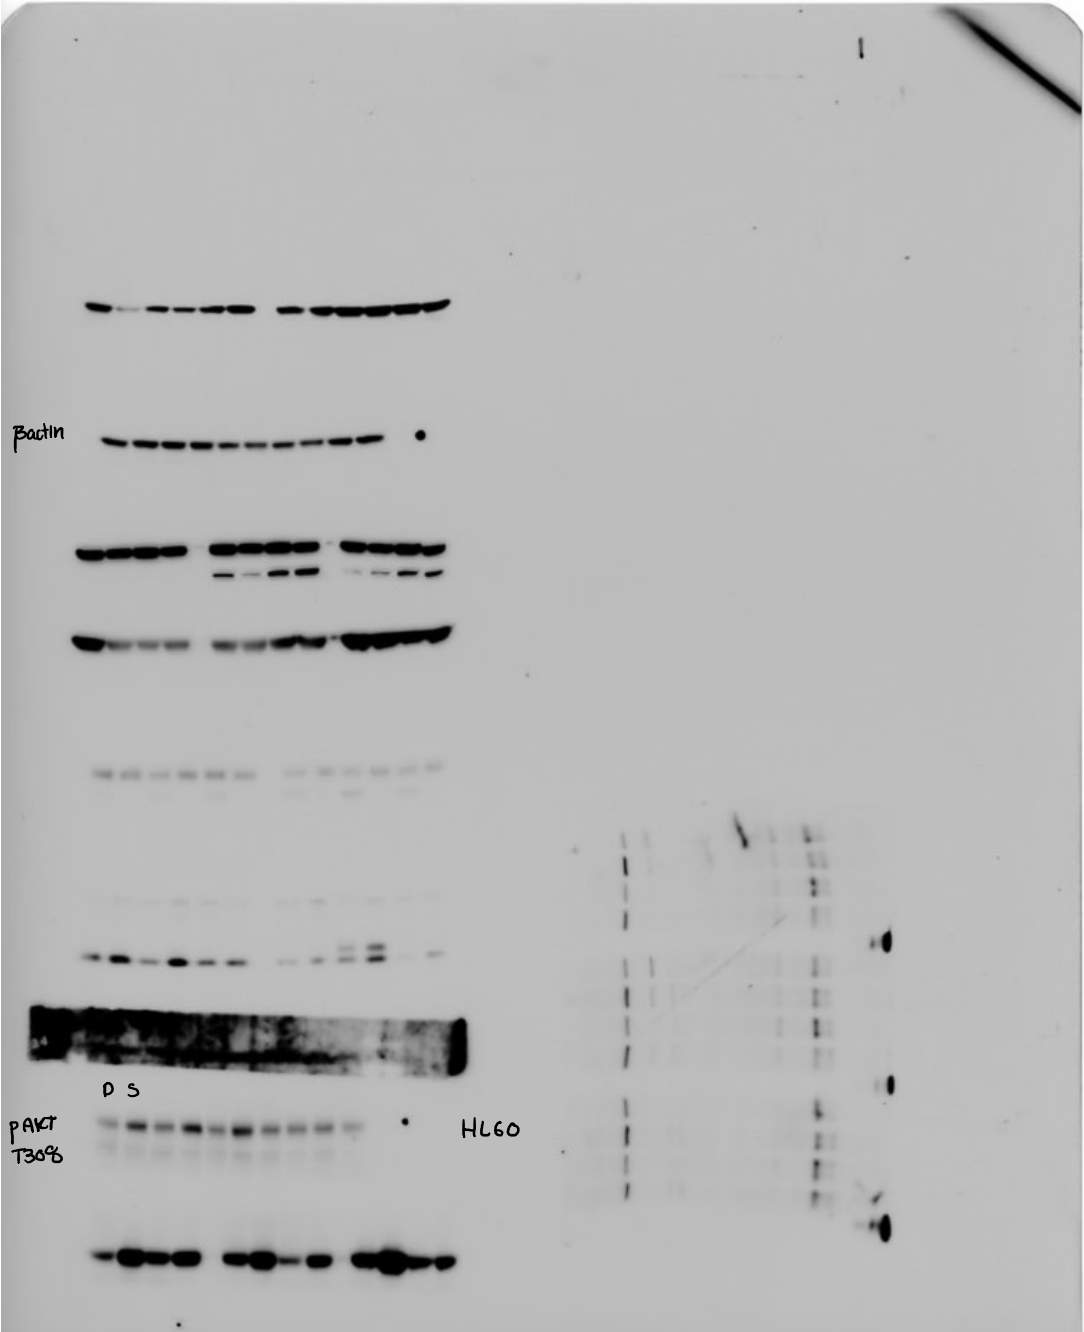



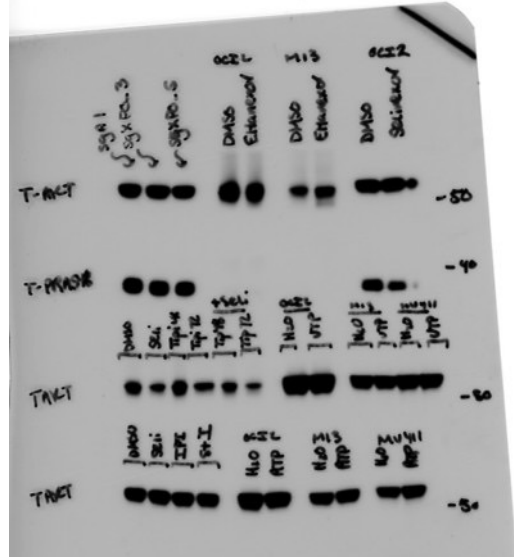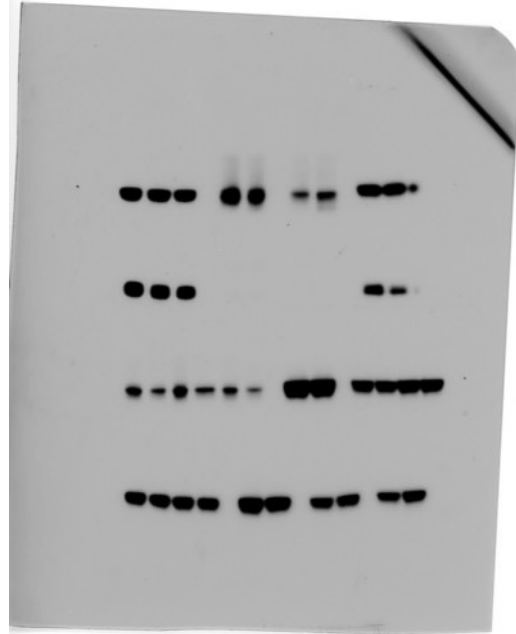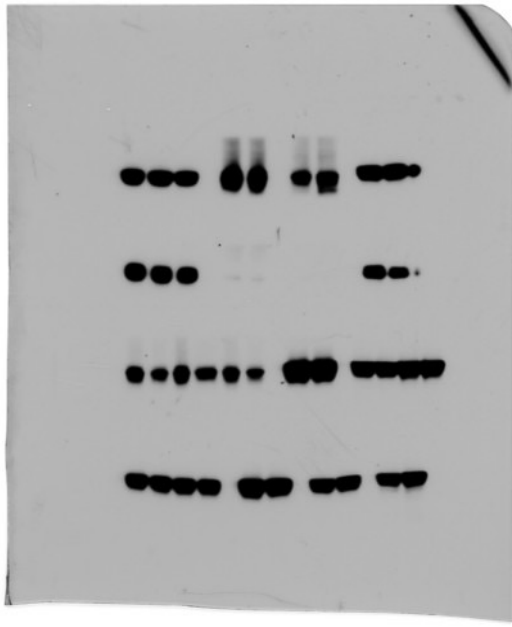

Panel A,B

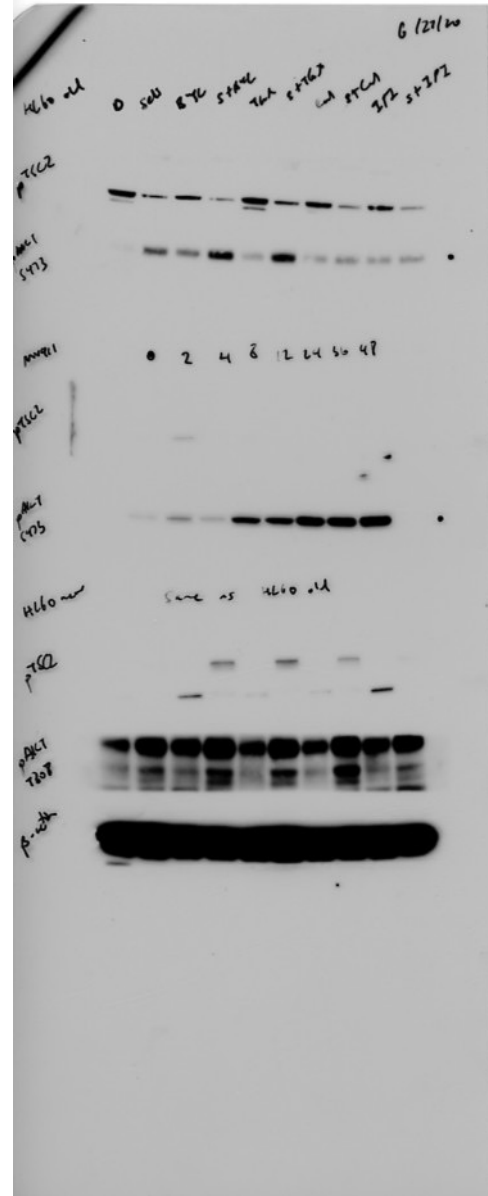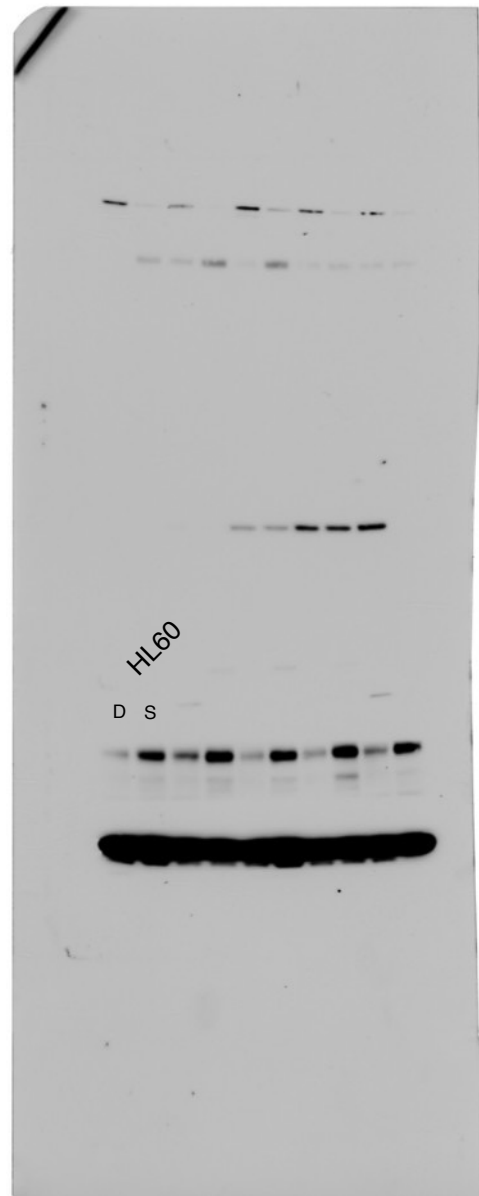

Panel B

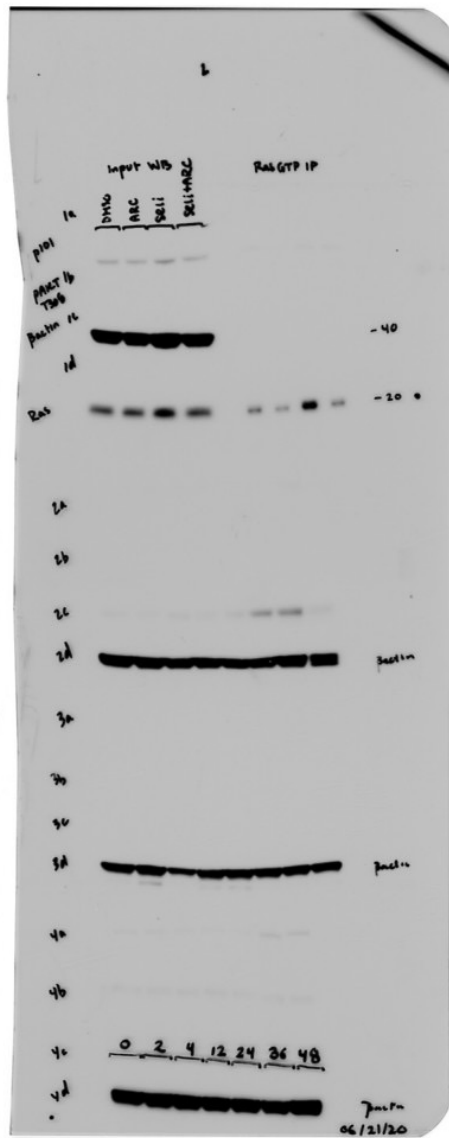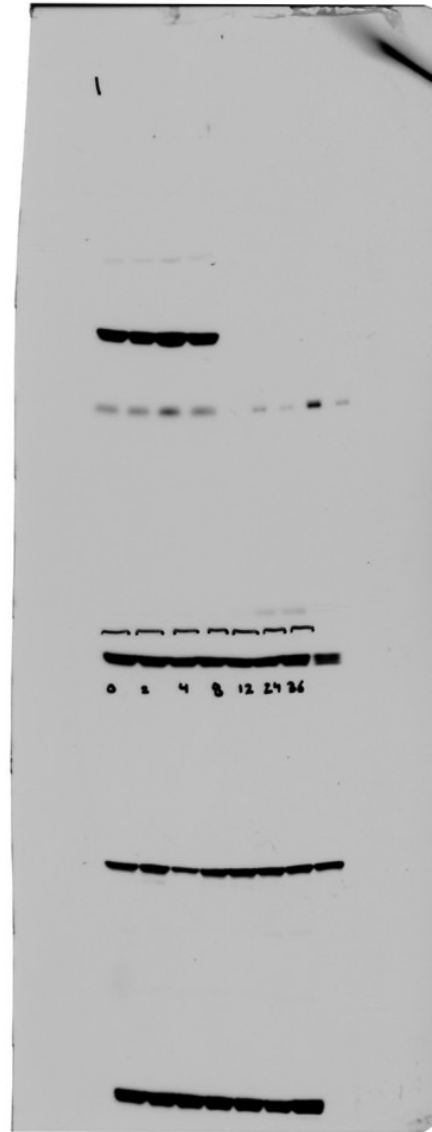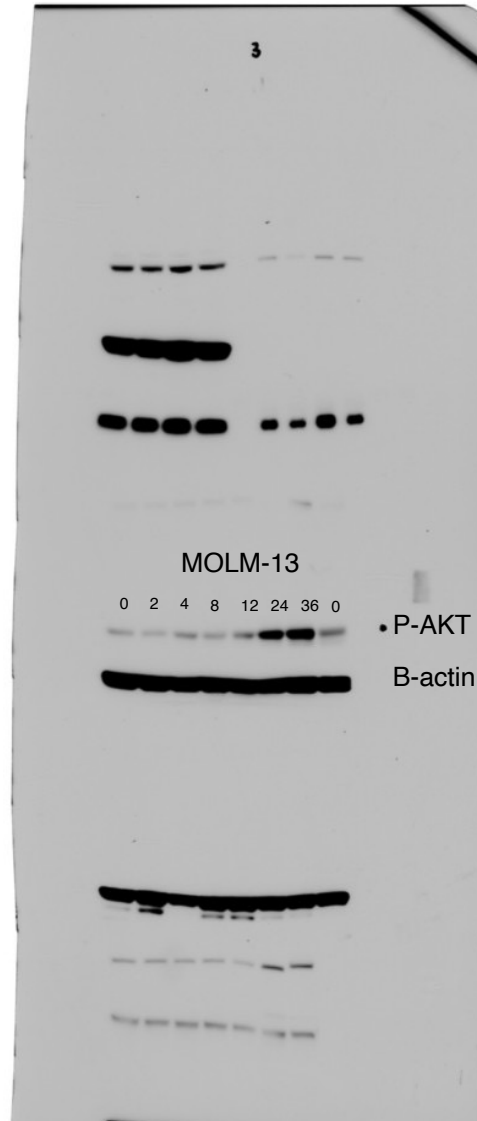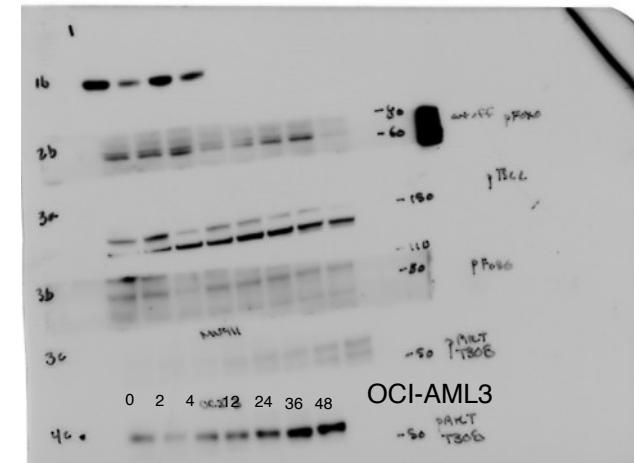

Panel B

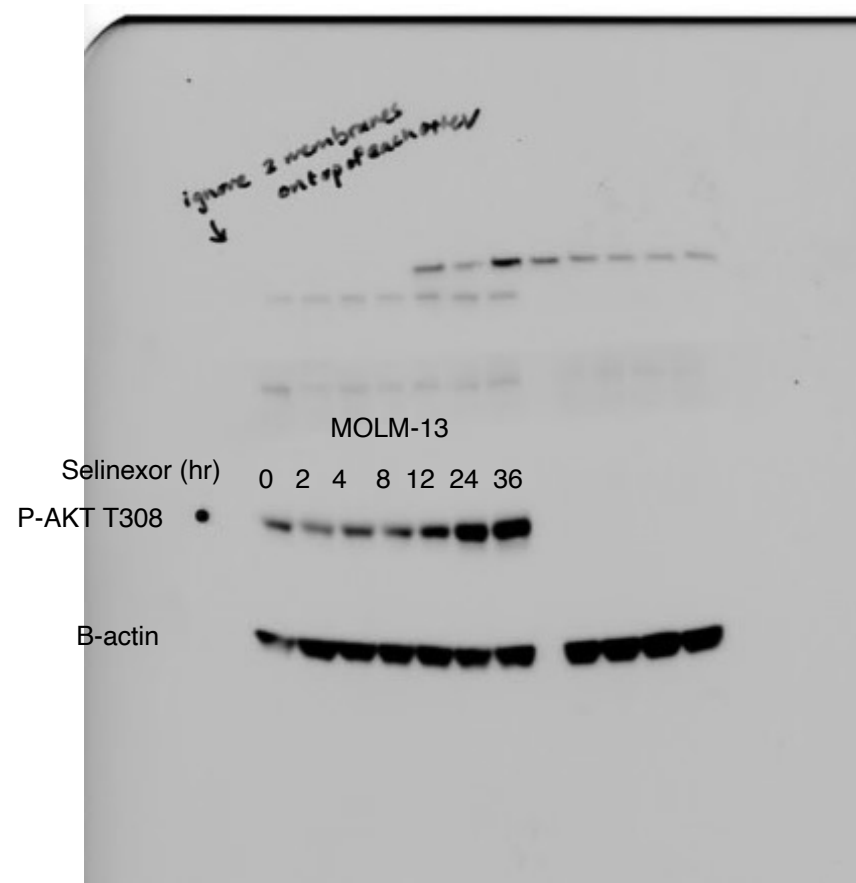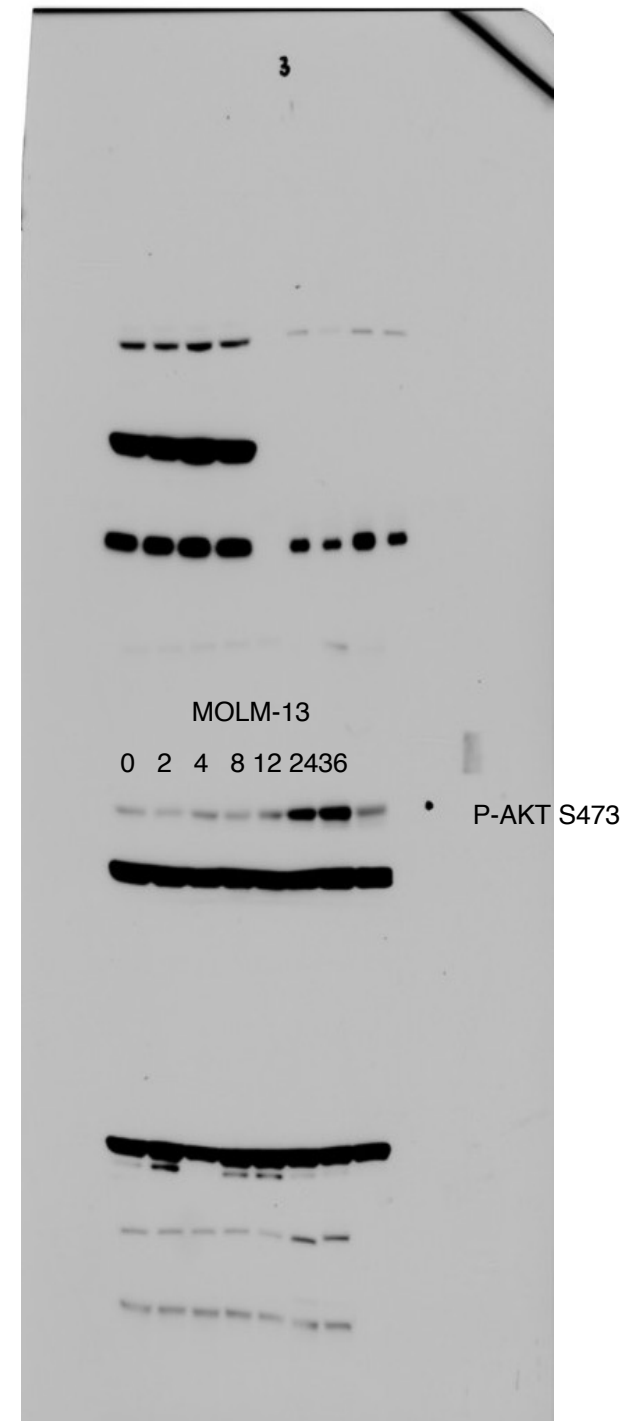

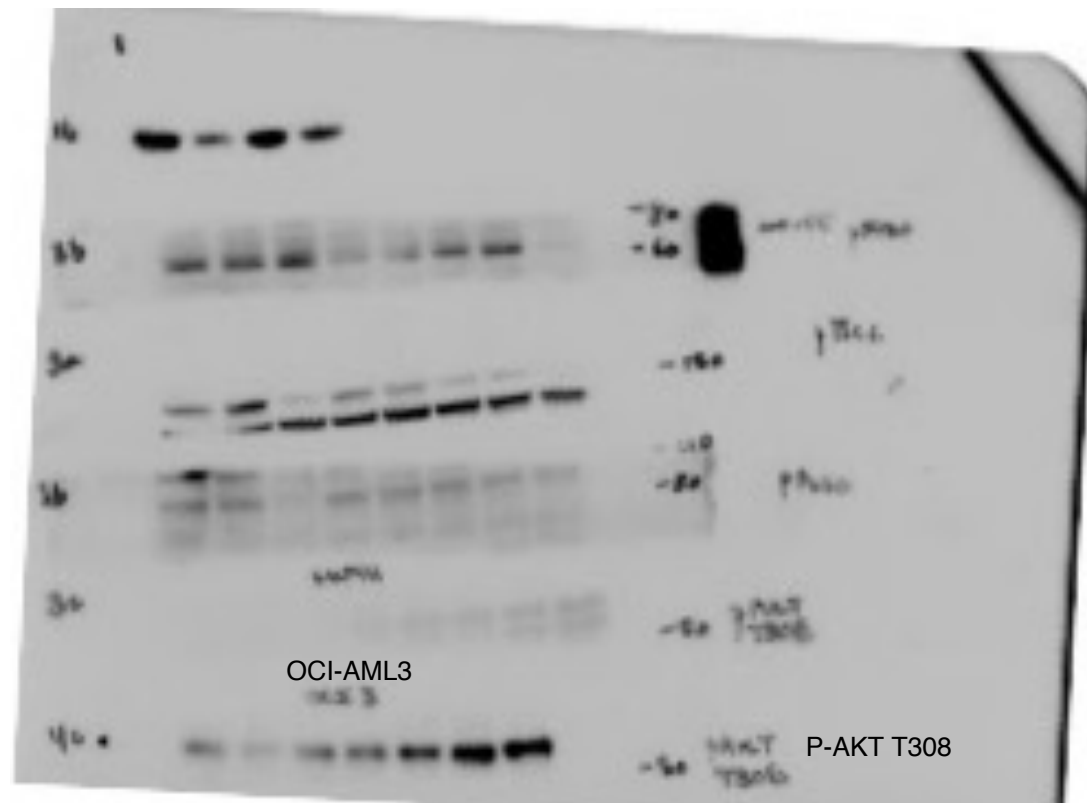

Panel B

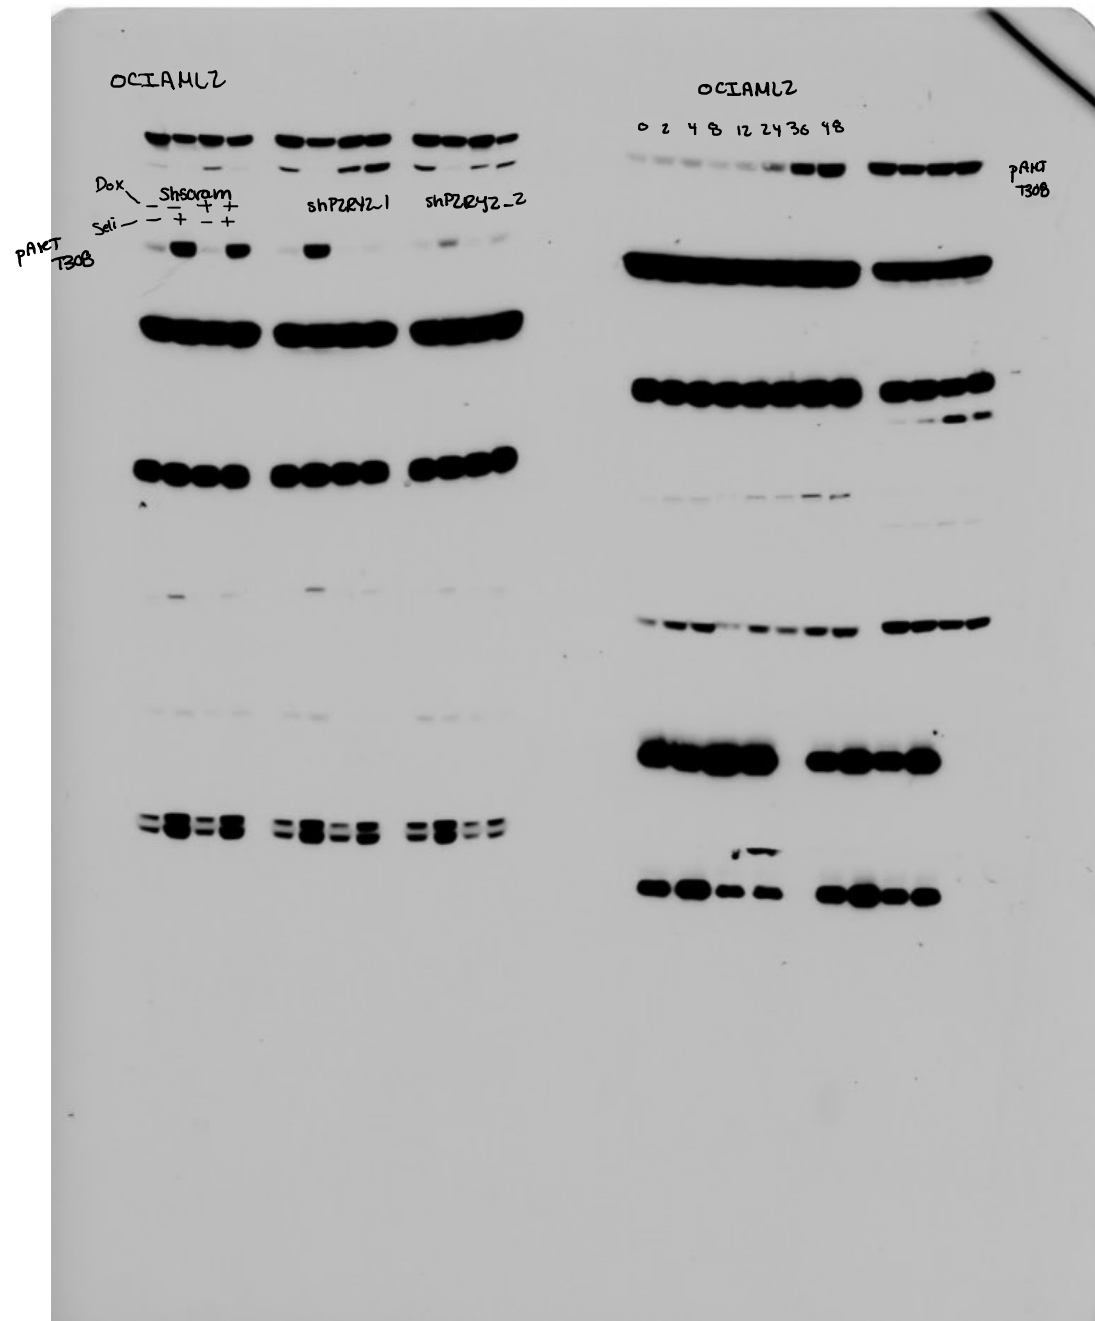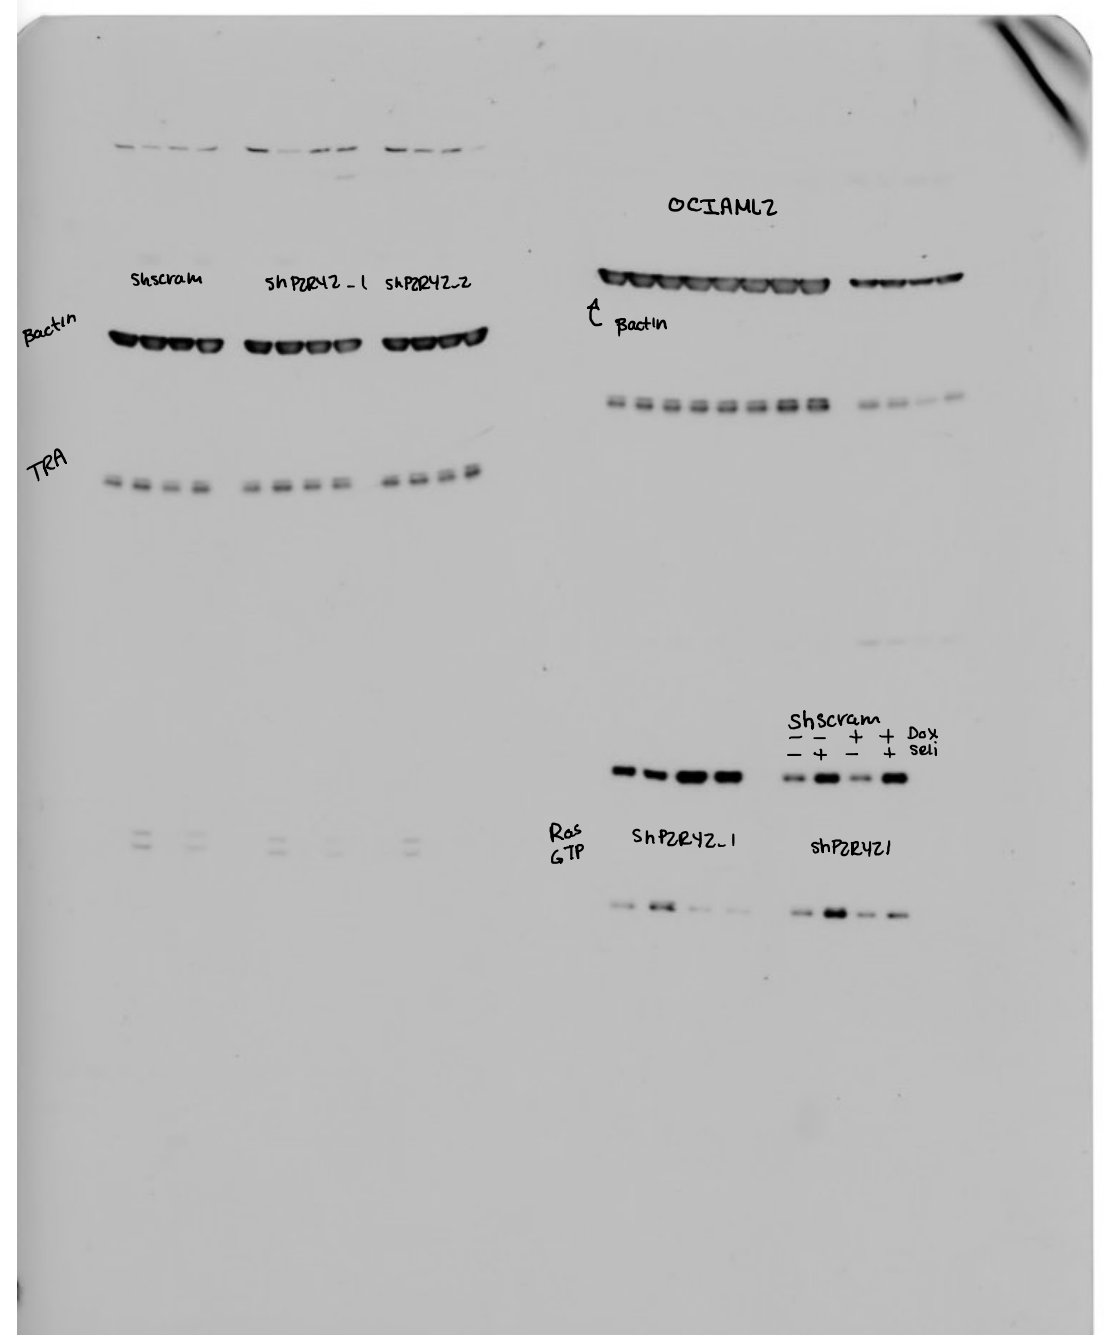

Panel B

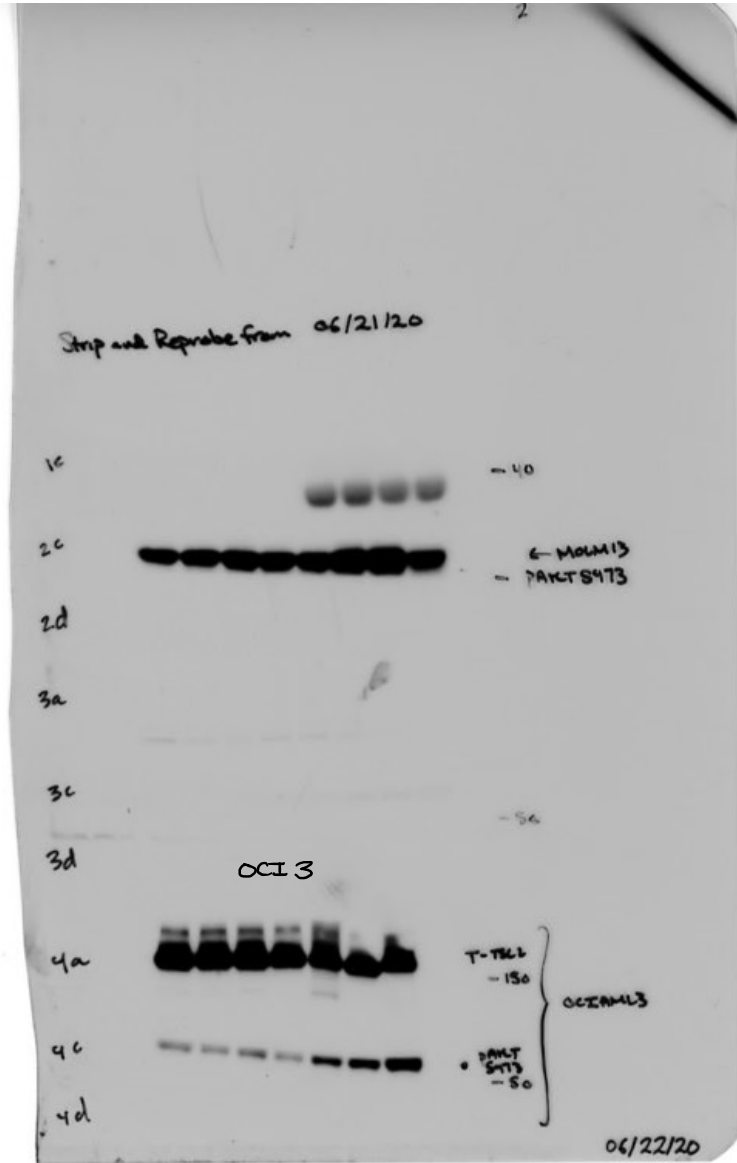

Panel C

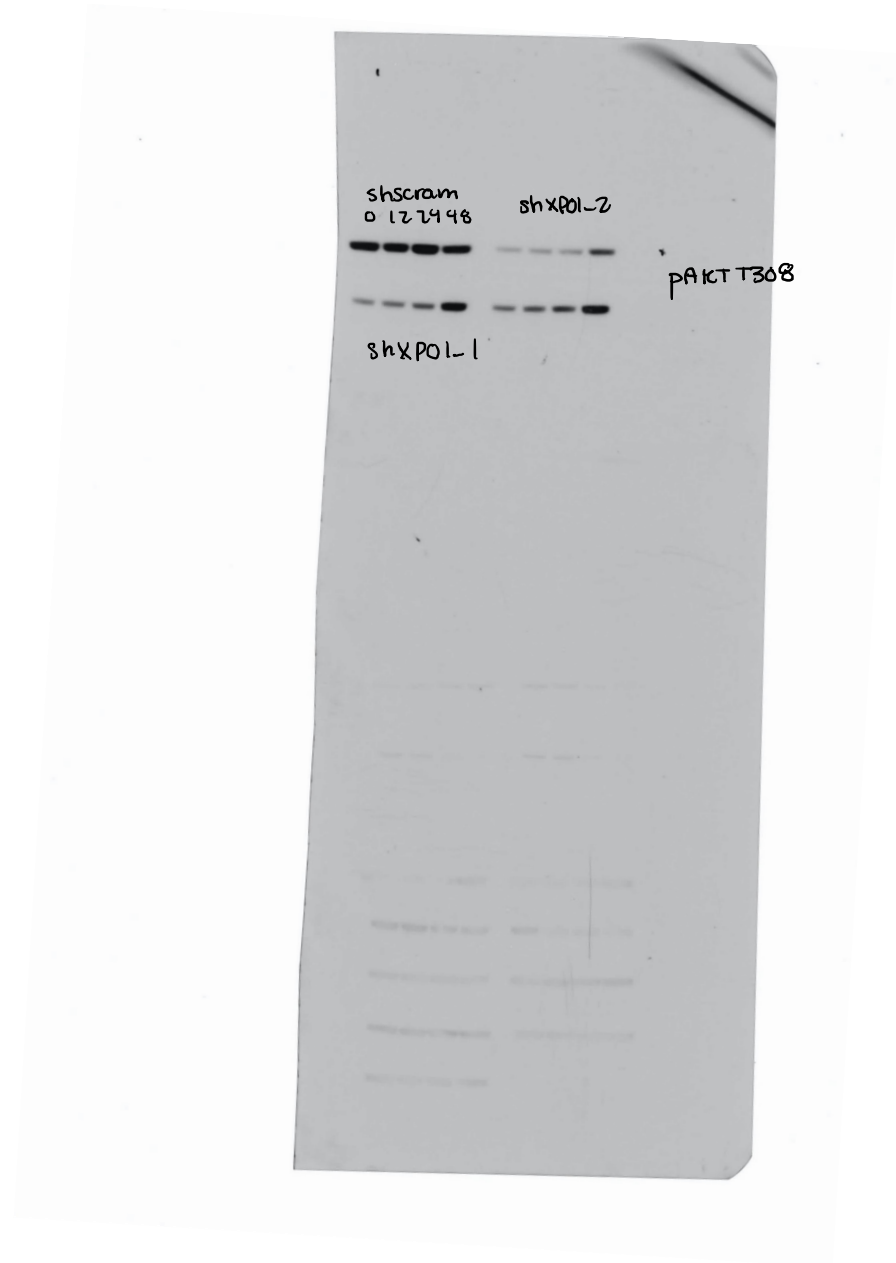



Panel C

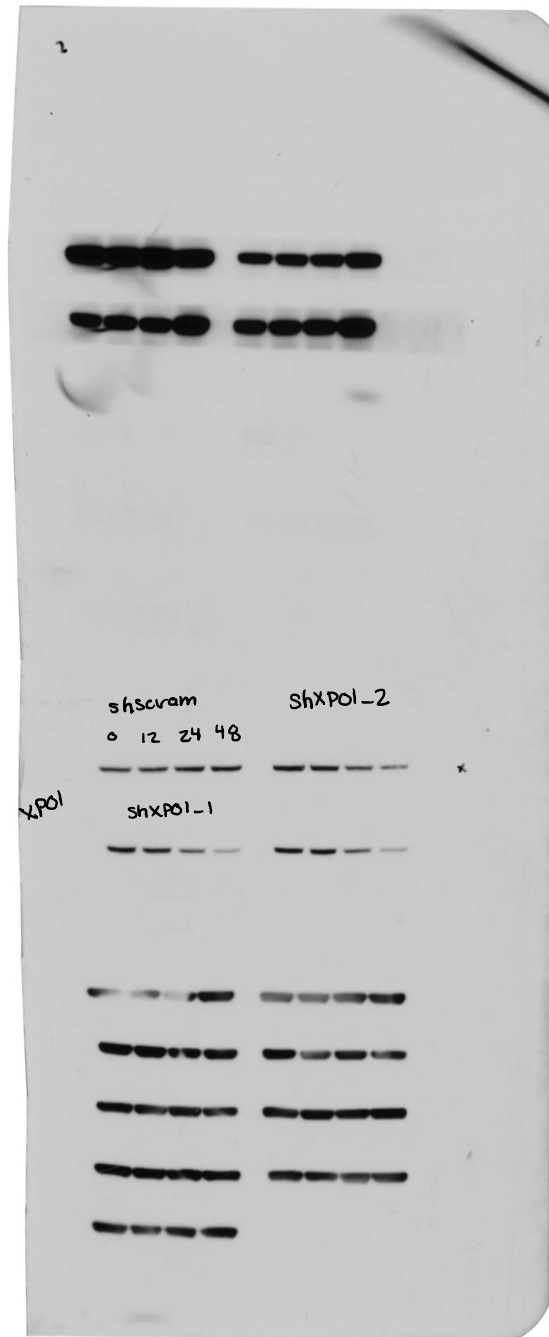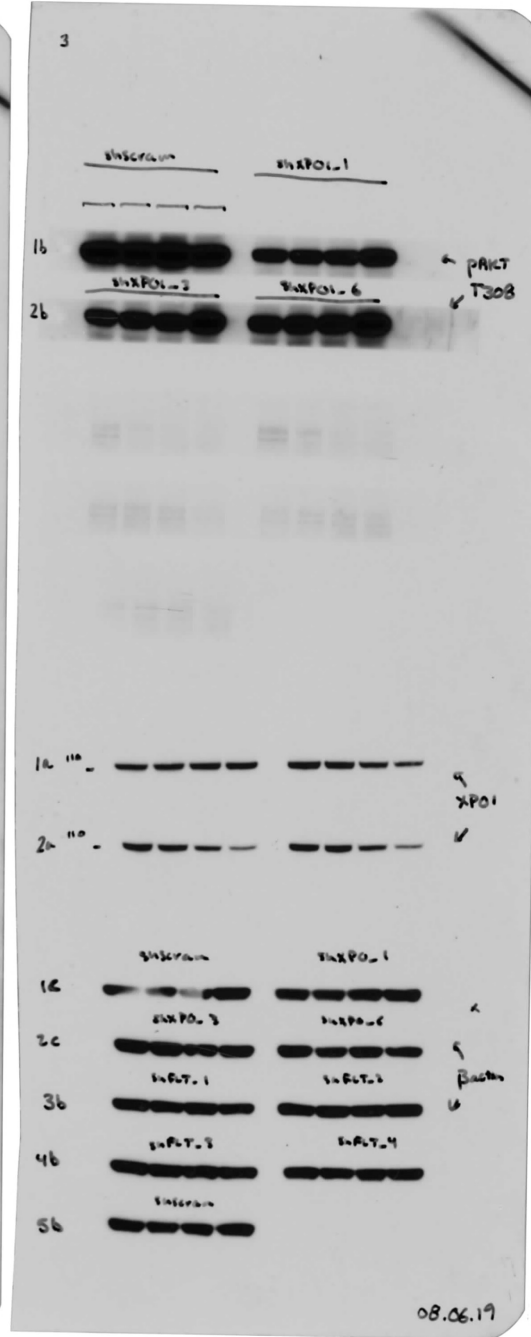

Panel D

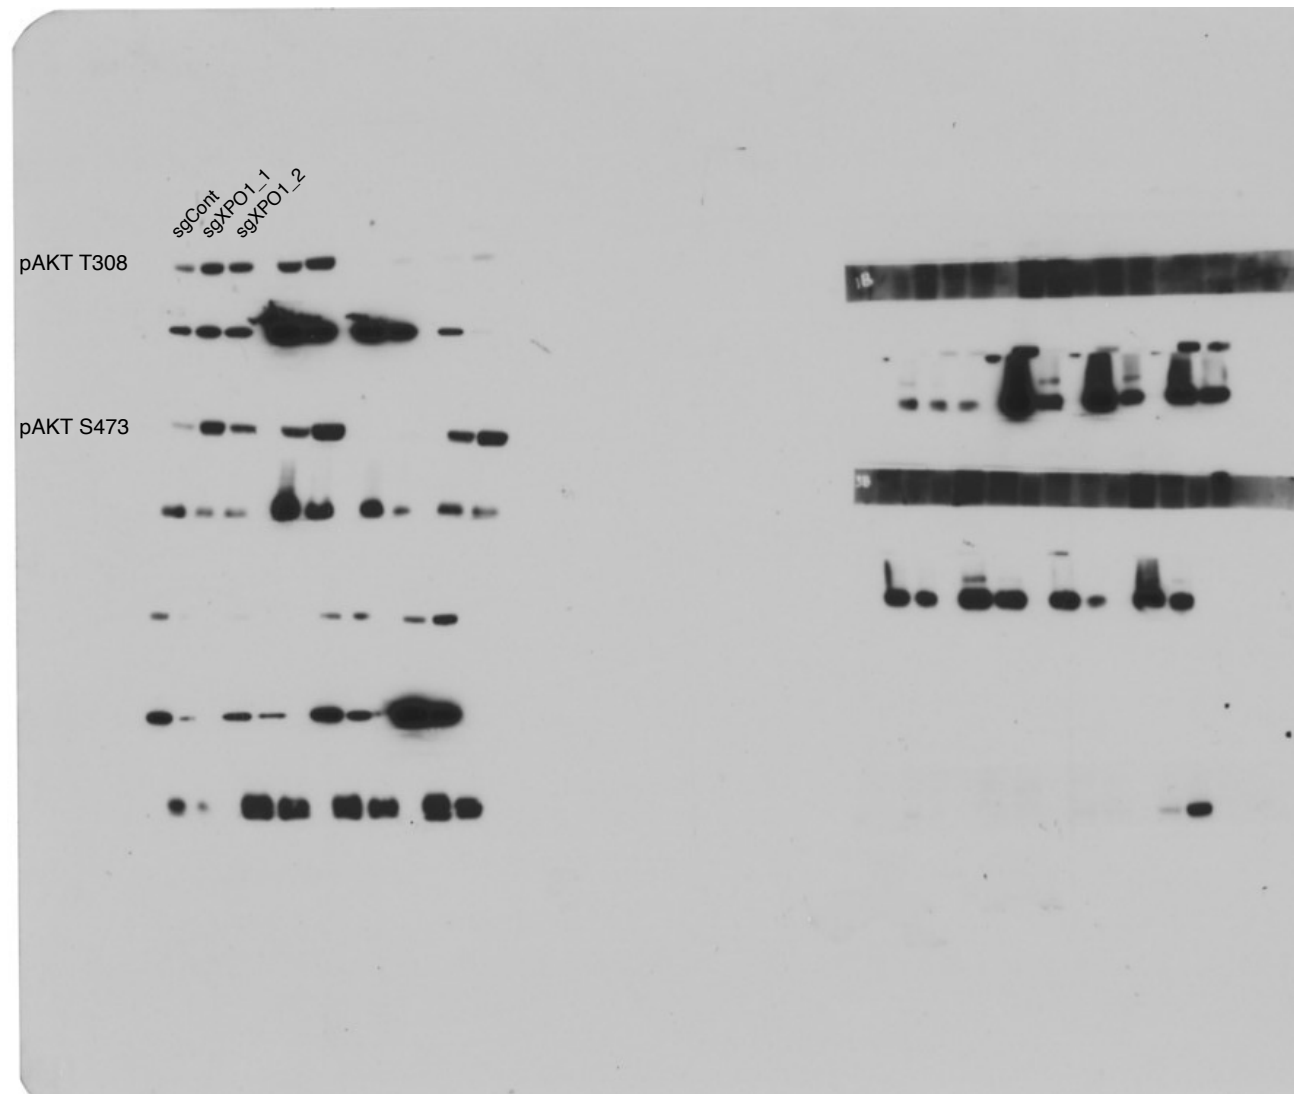

Panel D

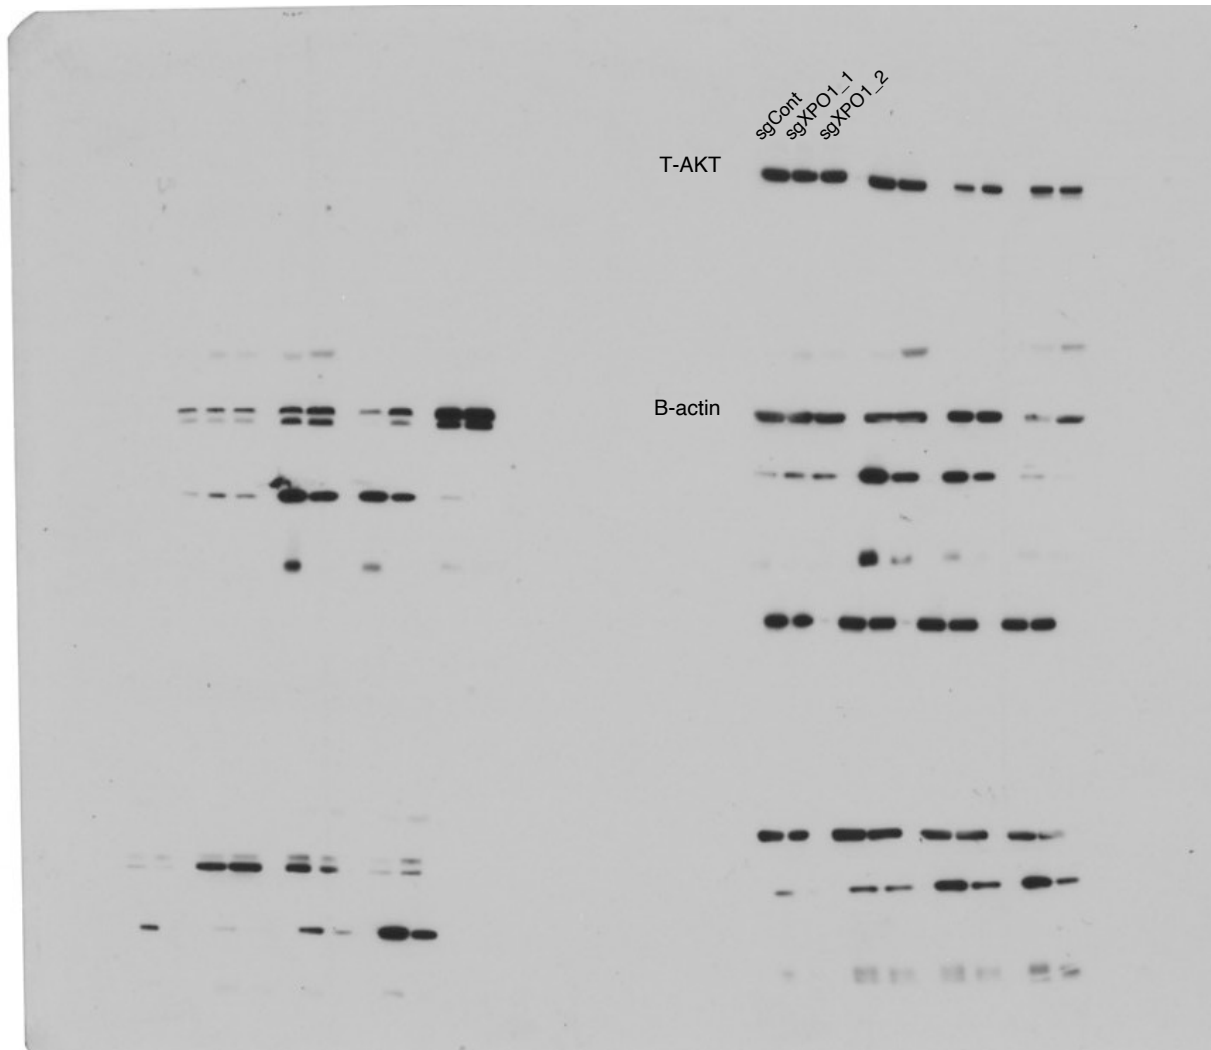

Supplement: NIHMS1868436-supplement-1868436_SD_Fig2.pdf [file NIHMS1868436-supplement-1868436_SD_Fig2.pdf]
