# Supplementary material
Source: PubMed Central journal article supplement (PMC9949365)

Extended Data Figure 4  
Panel E,F

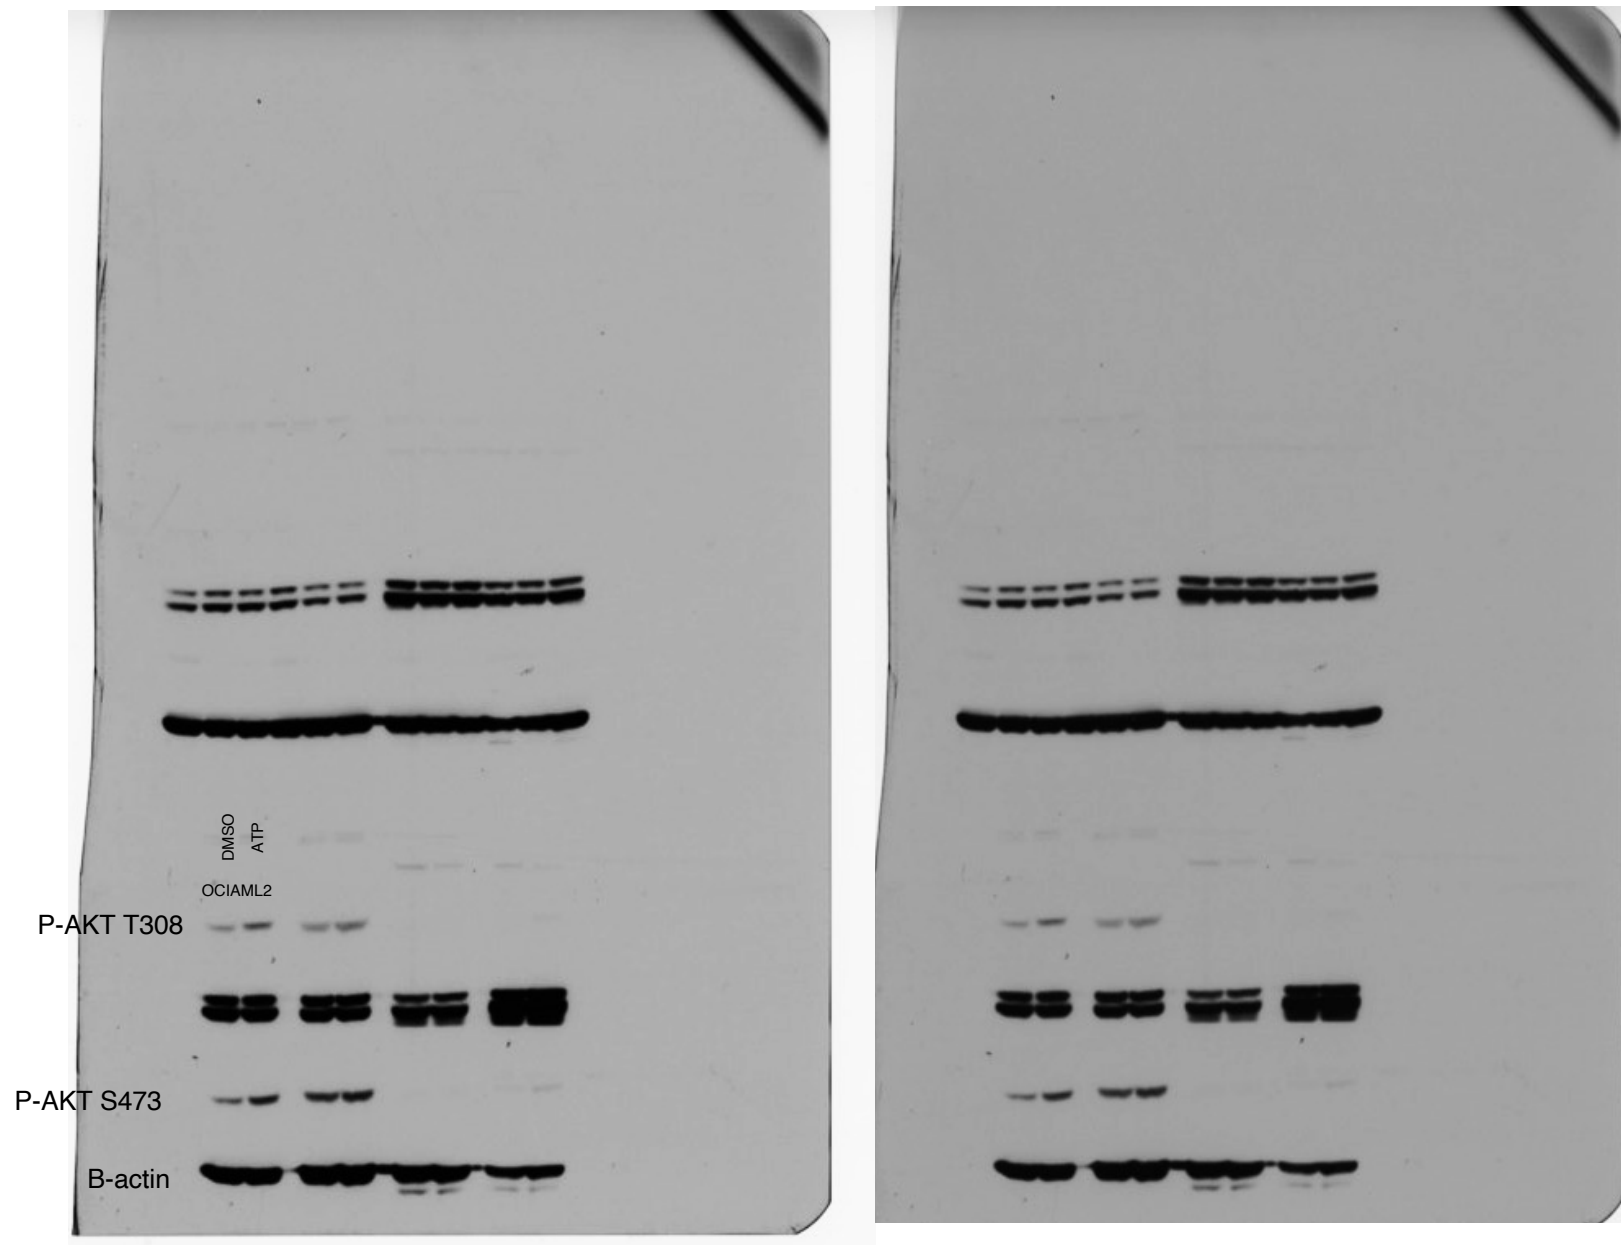

Panel E,F

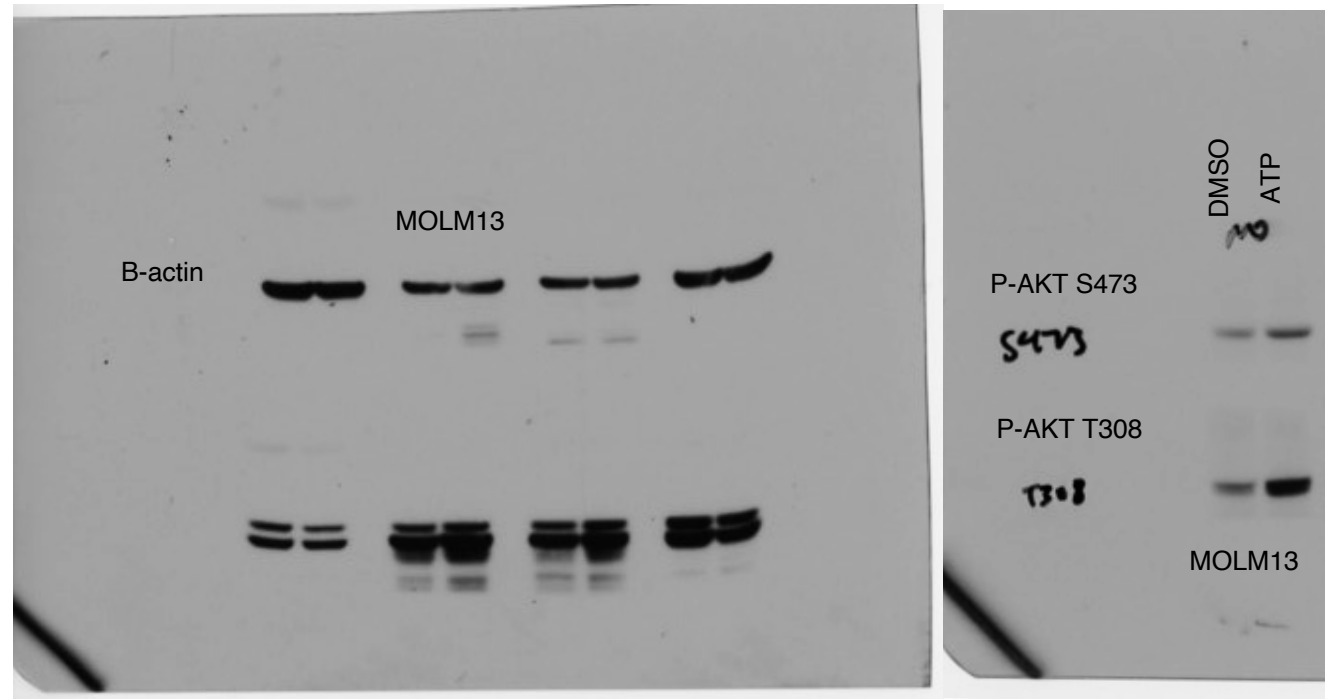

Panel E,F

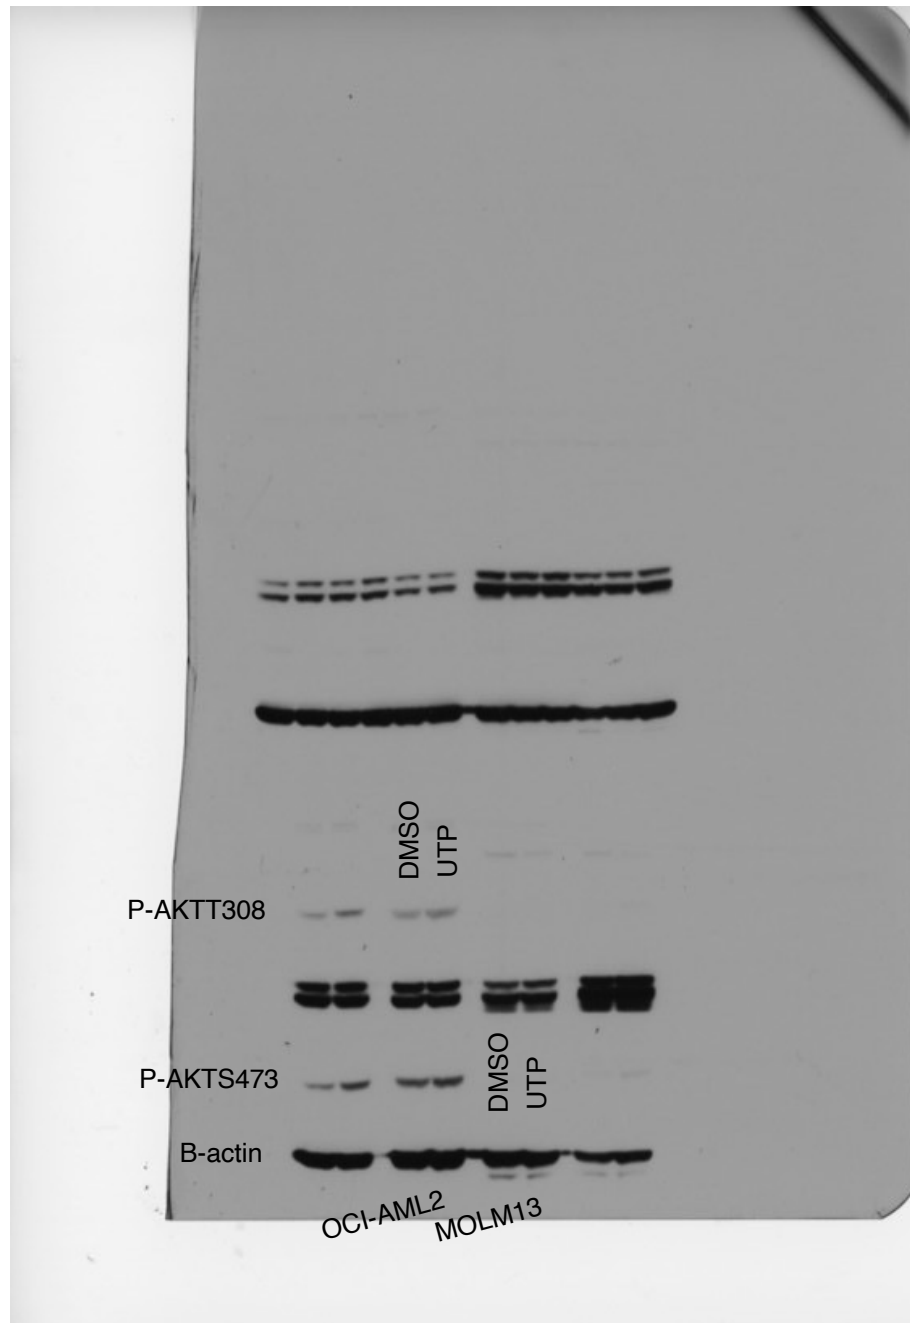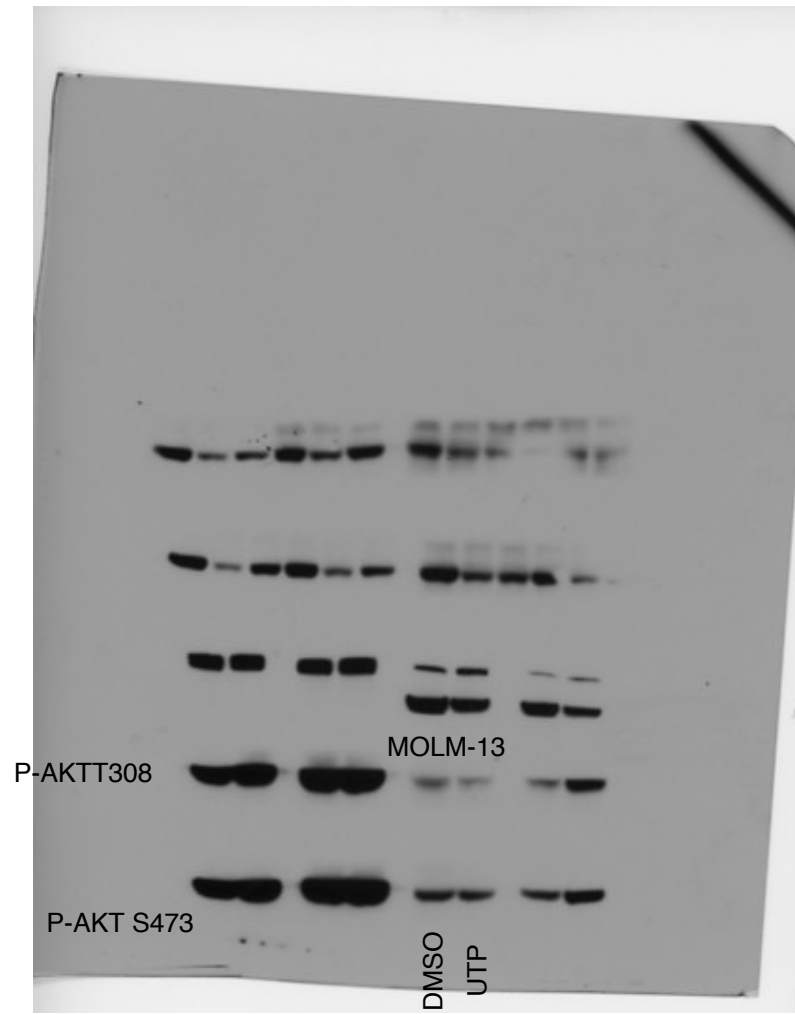

Panel I

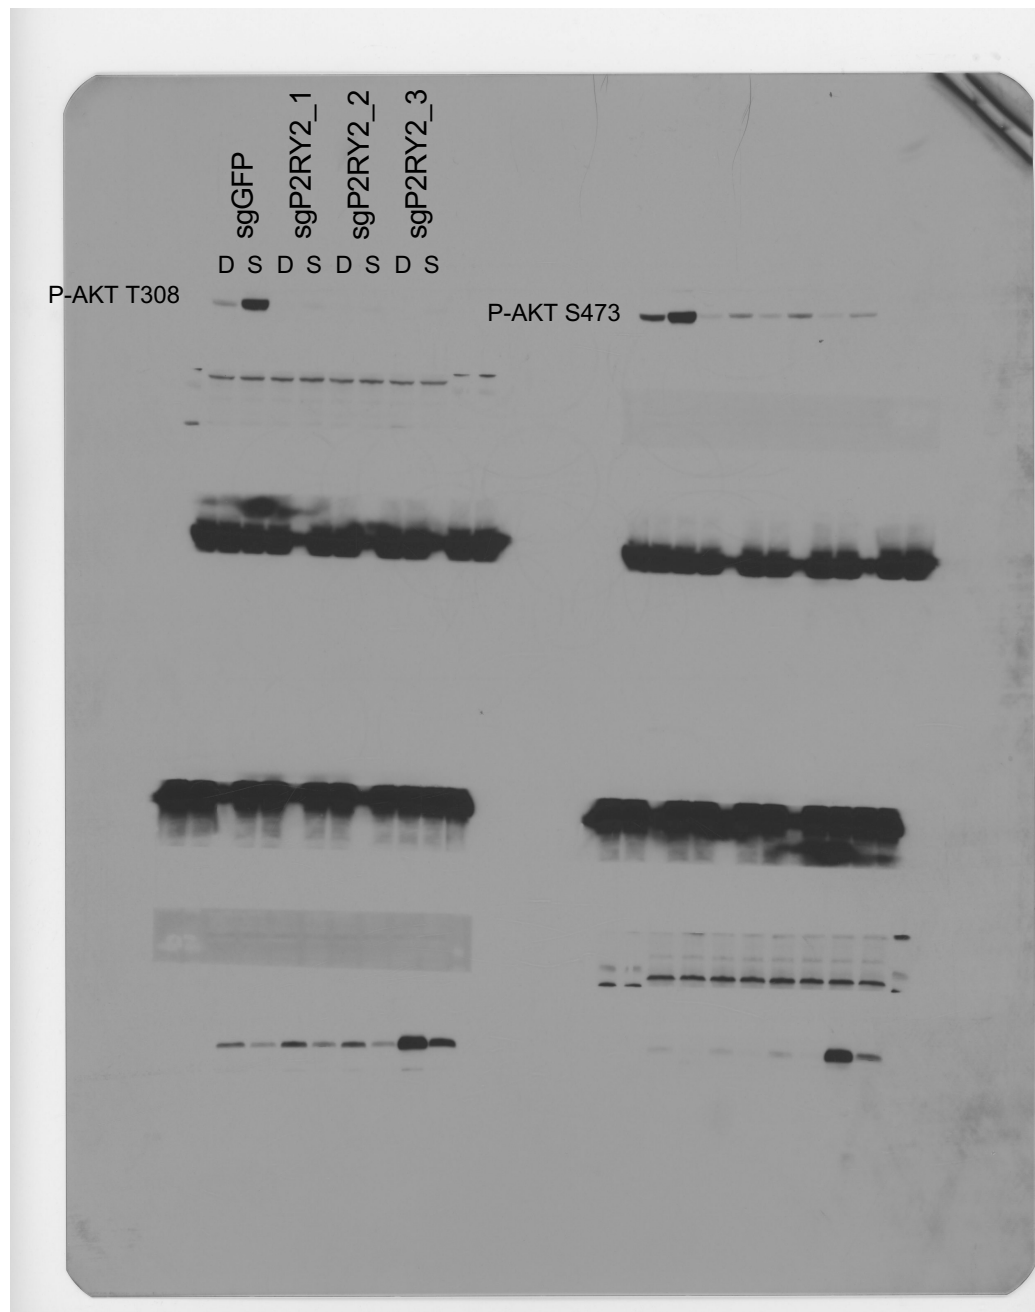

Panel I

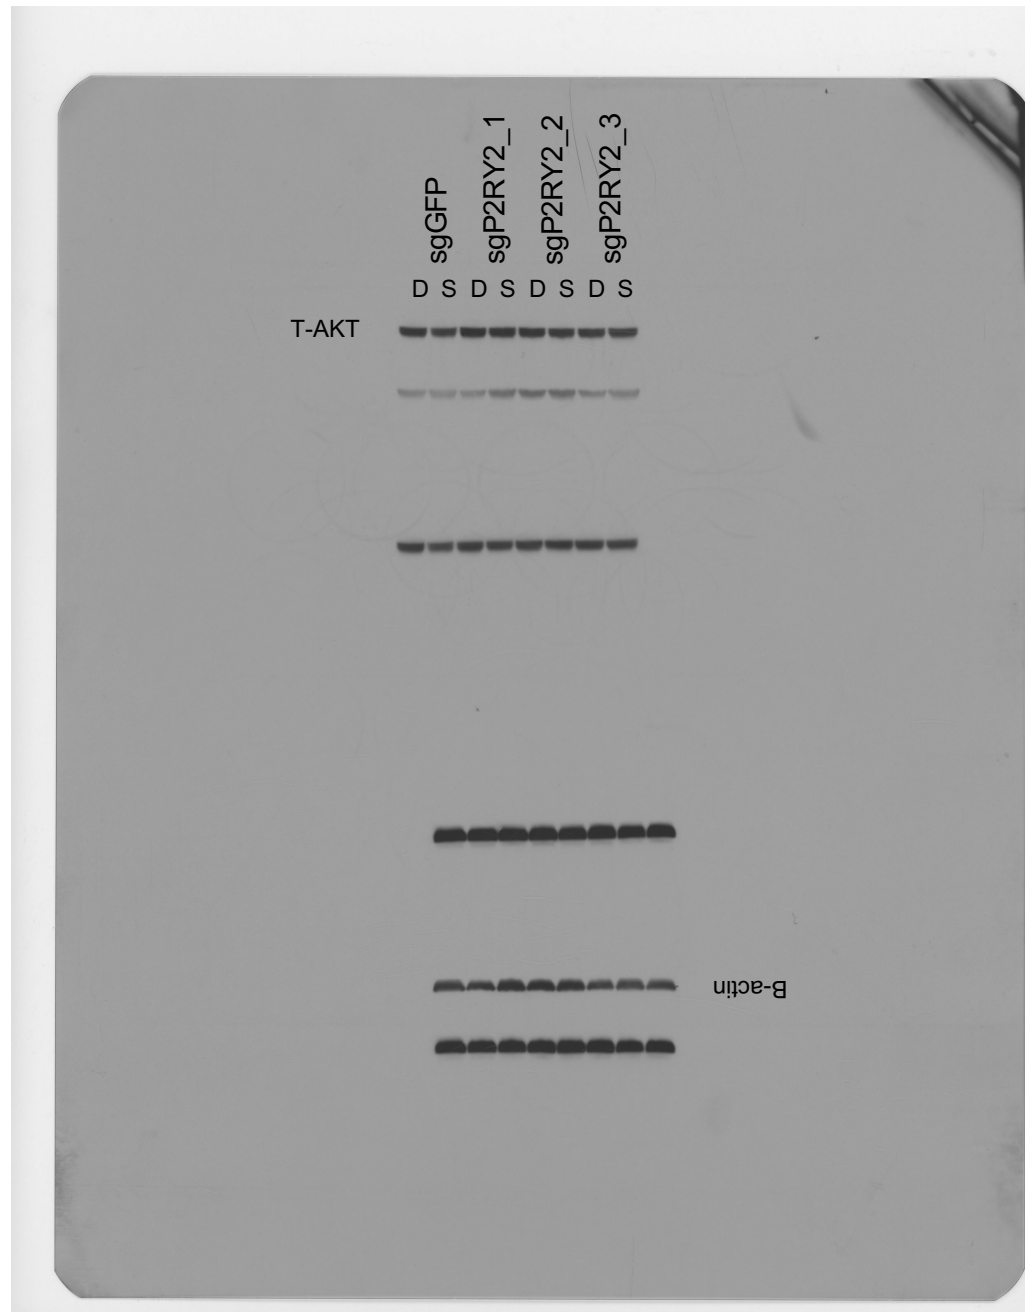

Panel K

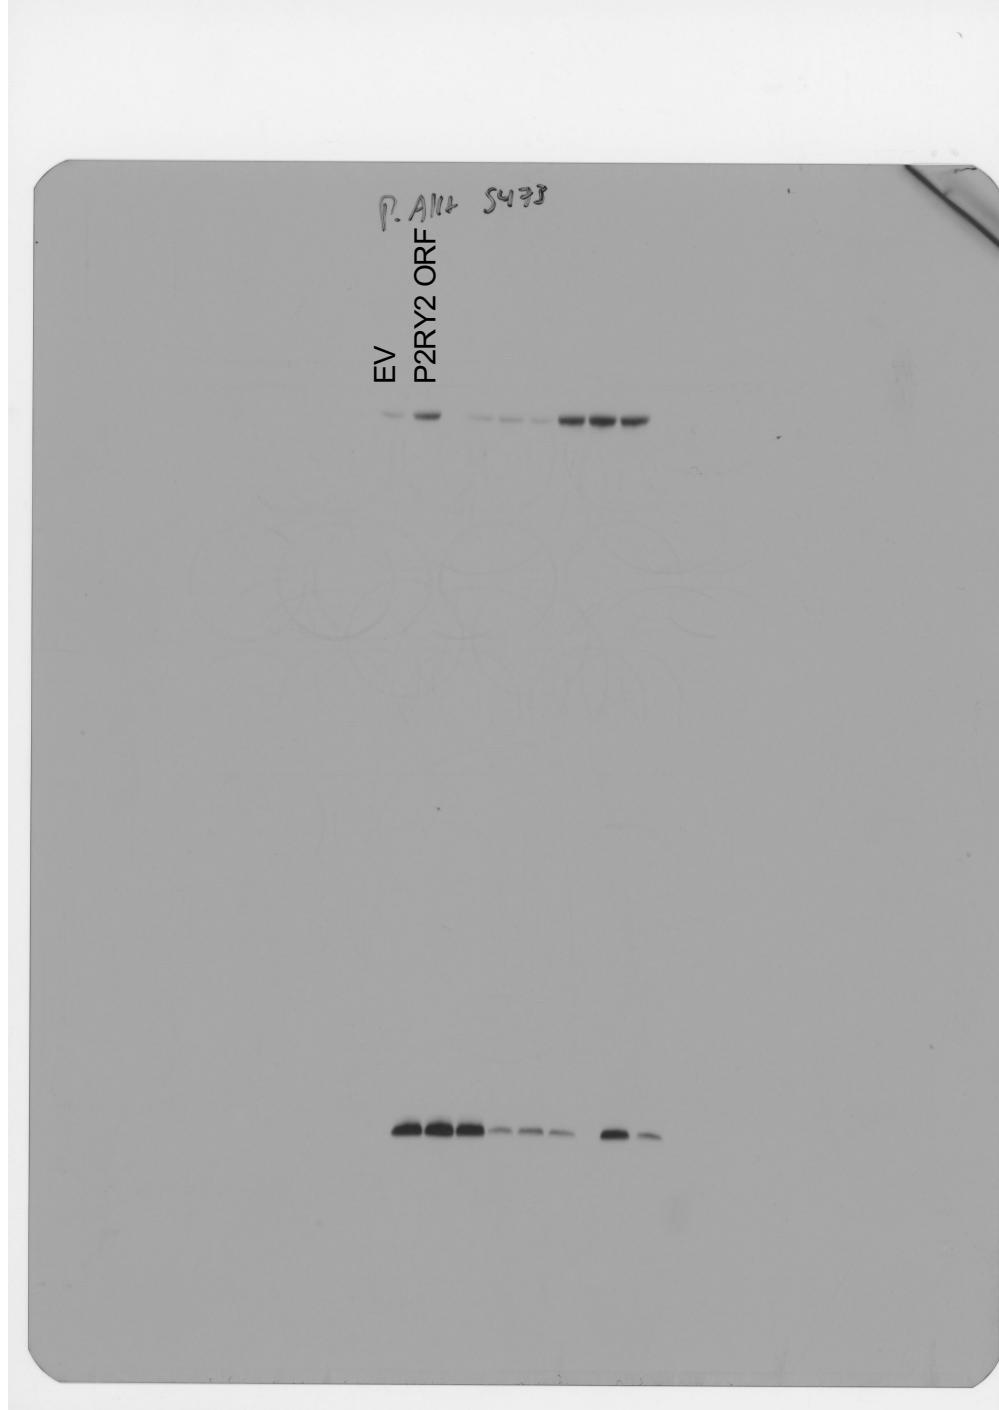

Panel K

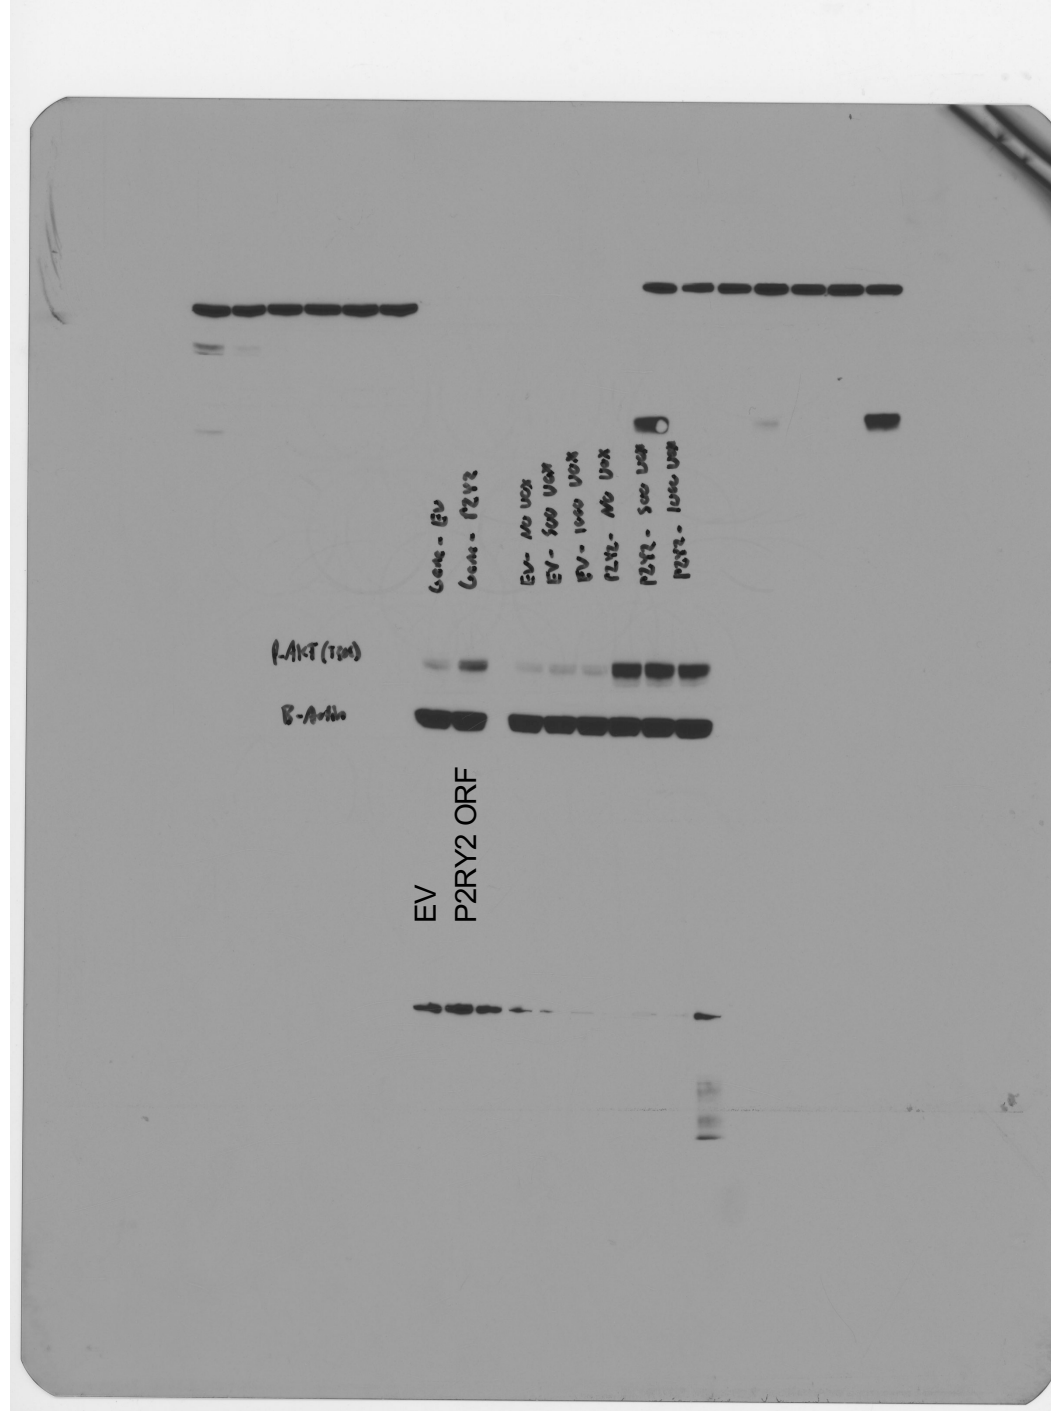

Panel K

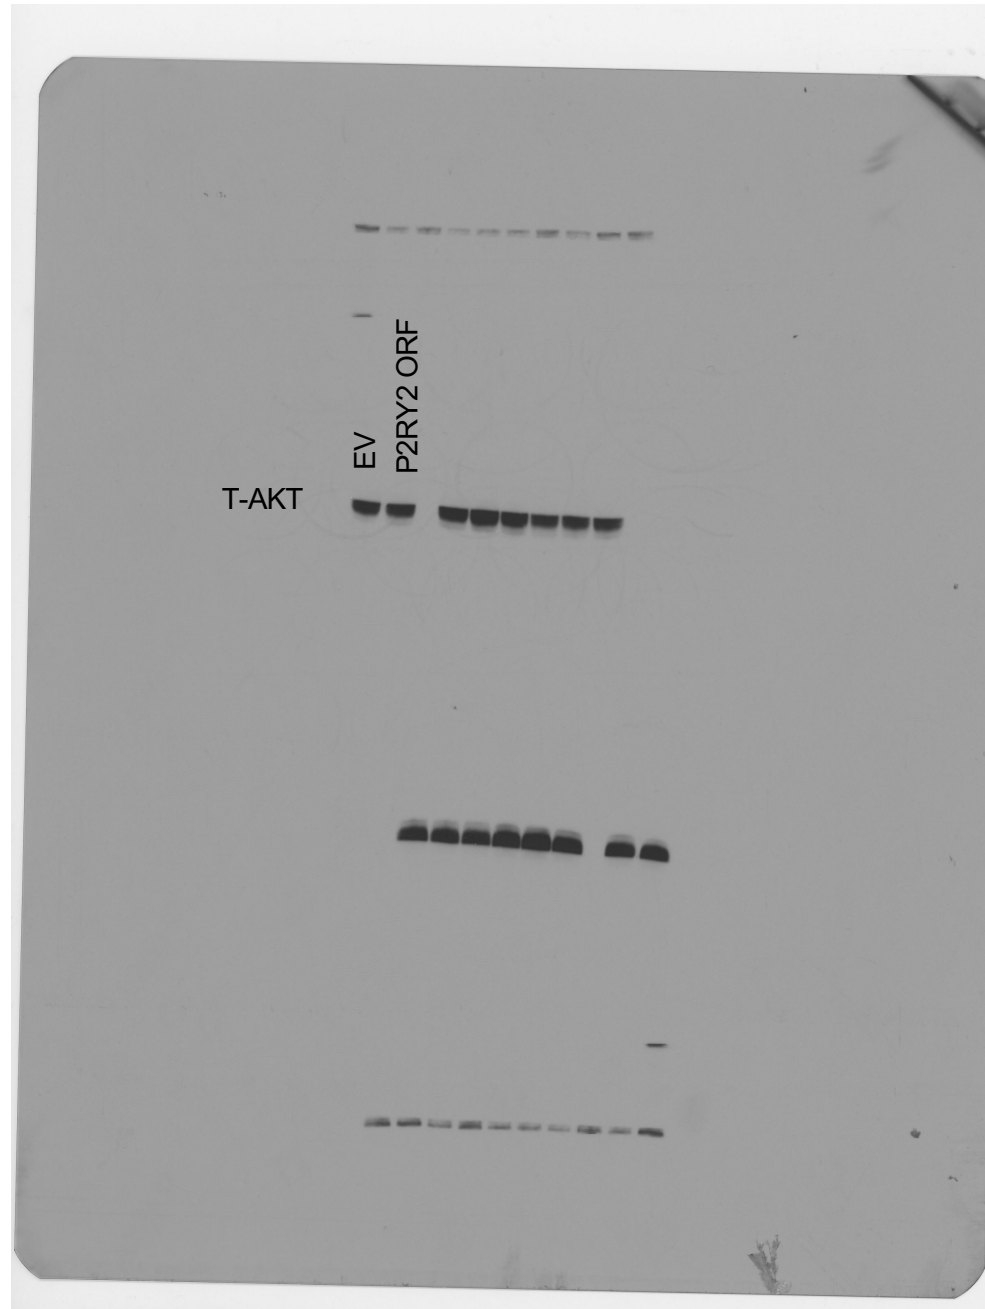



Figure S4  
Panel K

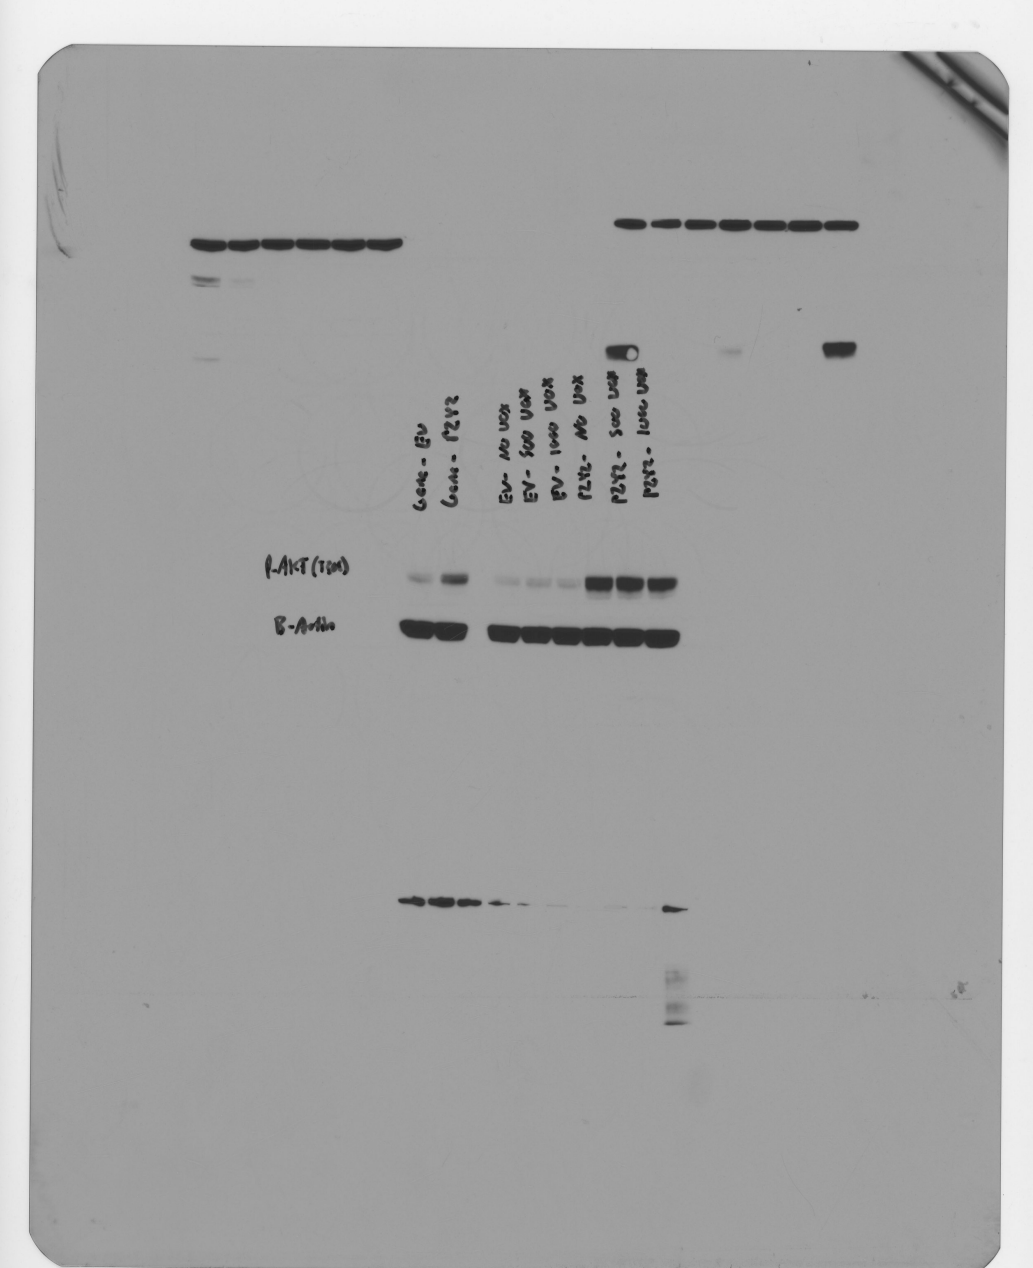

Supplement: NIHMS1868436-supplement-1868436_SD_ED_Fig4.pdf [file NIHMS1868436-supplement-1868436_SD_ED_Fig4.pdf]
