# Supplementary material
Source: PubMed Central journal article supplement (PMC9949365)

Panel C

P-AKT T308

OCIAML2

Dox: - - + +  
Seli: - + - +

shscram shP2RY2\_1 shP2RY2\_2

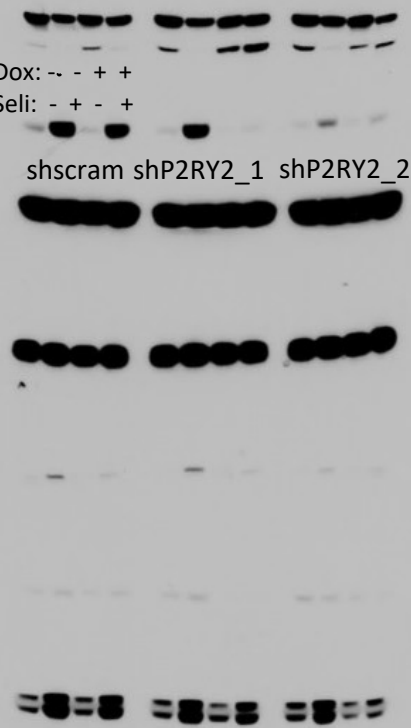

OCIAML2

0 2 4 8 12 24 36 48

pAKT T308

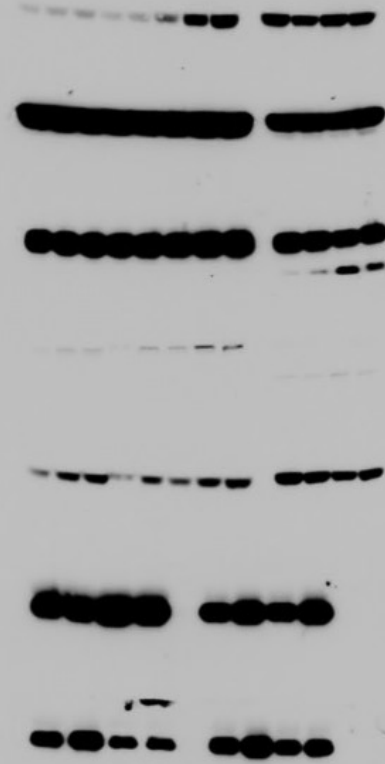

OCIAML2

shscram shP2RY2-1 shP2RY2-2

Bactin

B-actin

Bactin

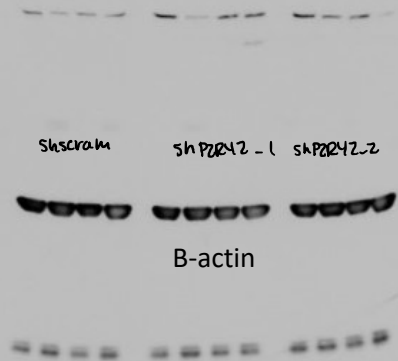

shscram  
- + + Dox  
- + - + Seli

Ras  
GTP

shP2RY2-1

shP2RY2-1

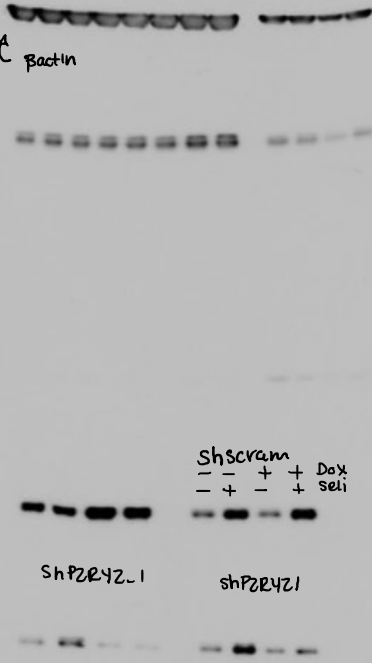

Panel C

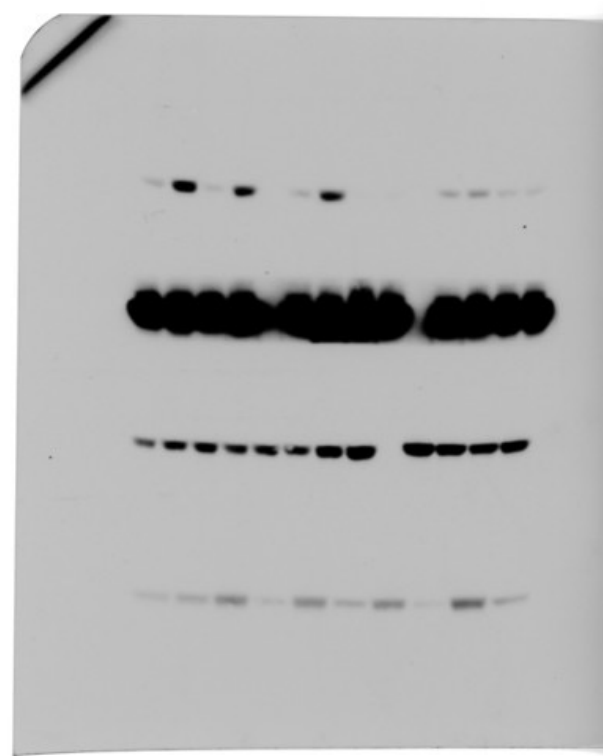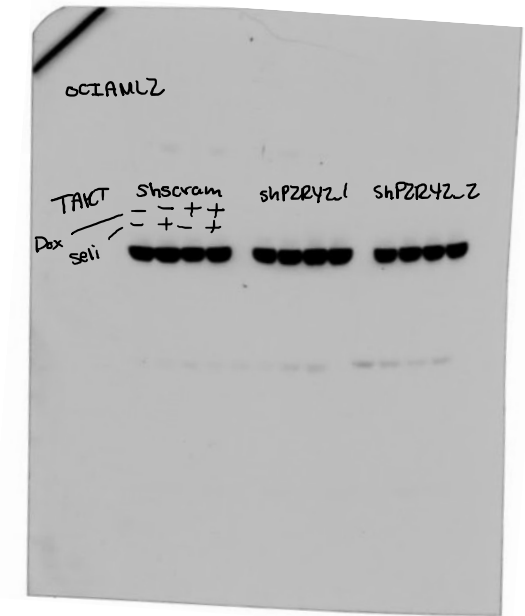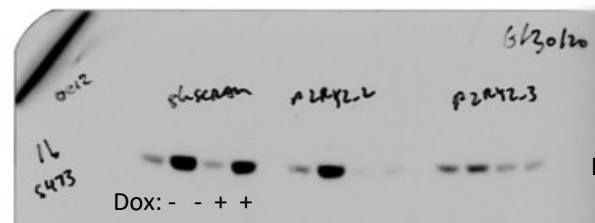

P-AKT S473

Dox: - - + +

Seli: - + - +

shscram shP2RY2\_1 shP2RY2\_2

Panel D

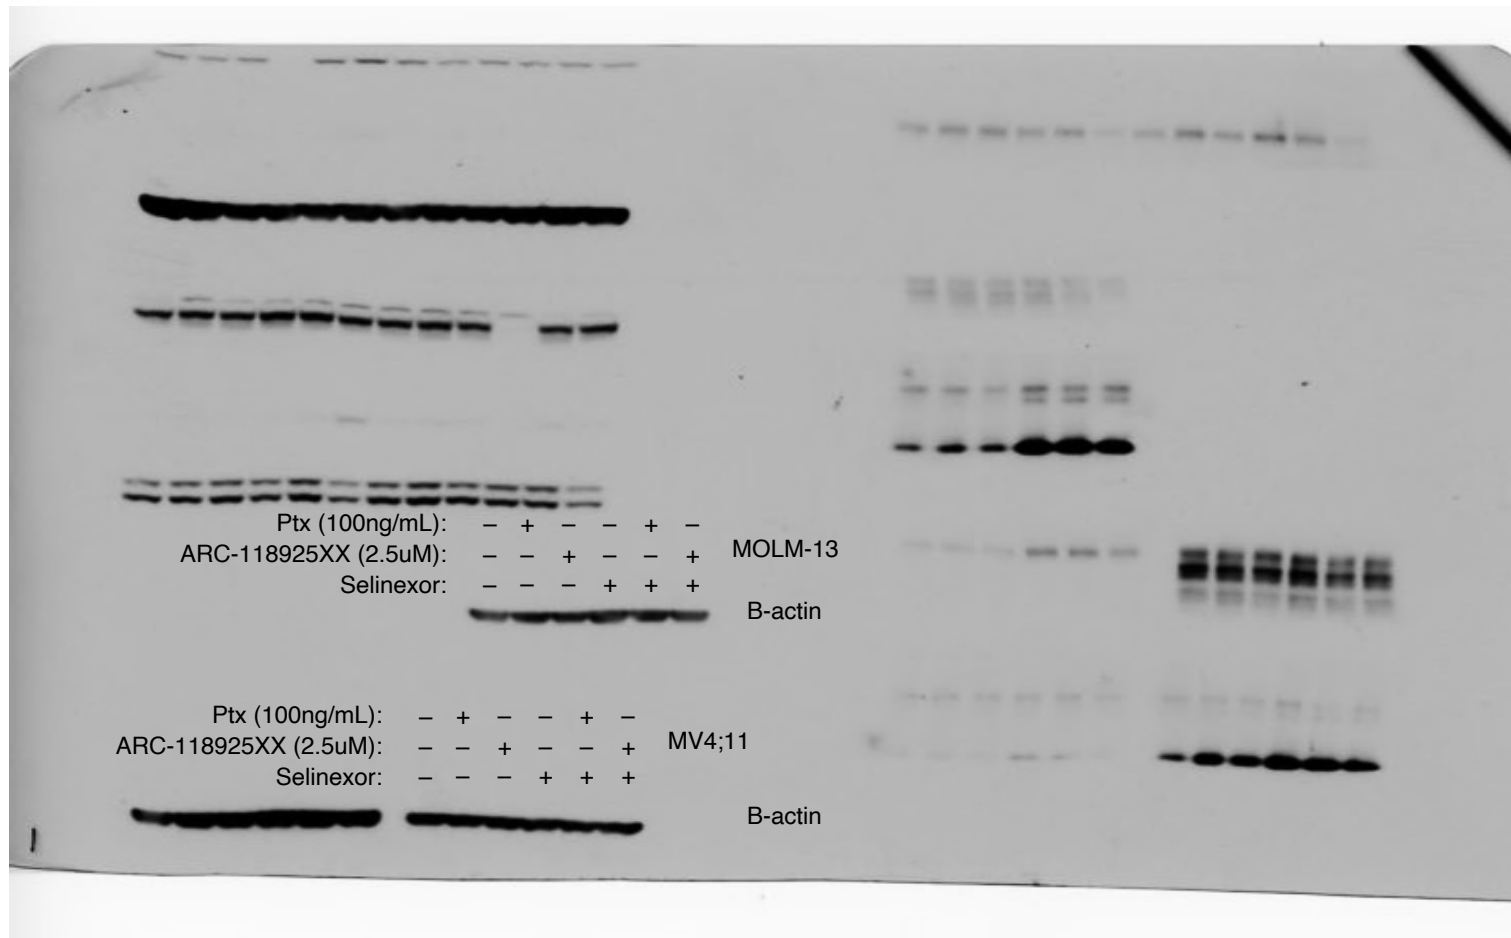

Panel D

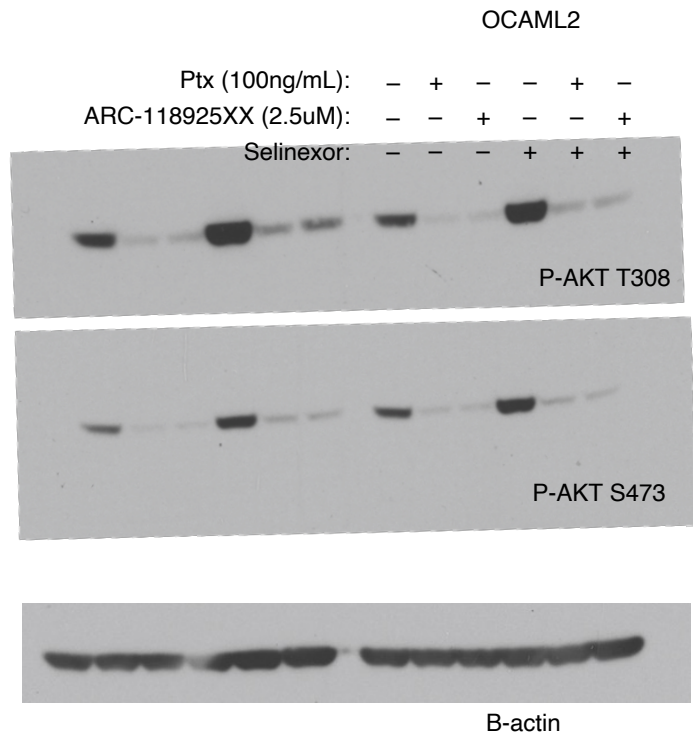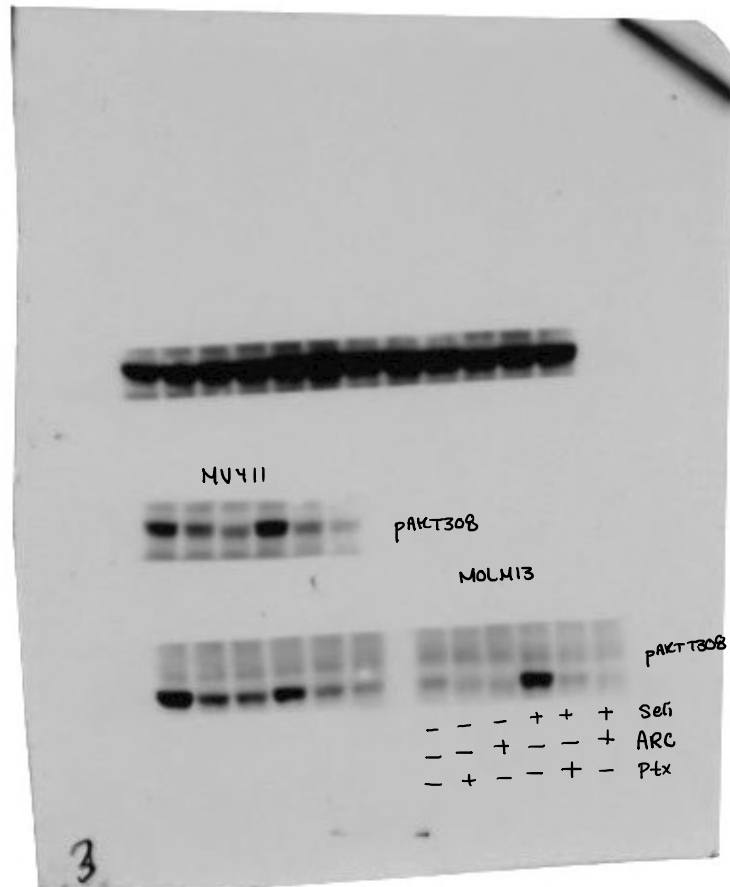

Panel G

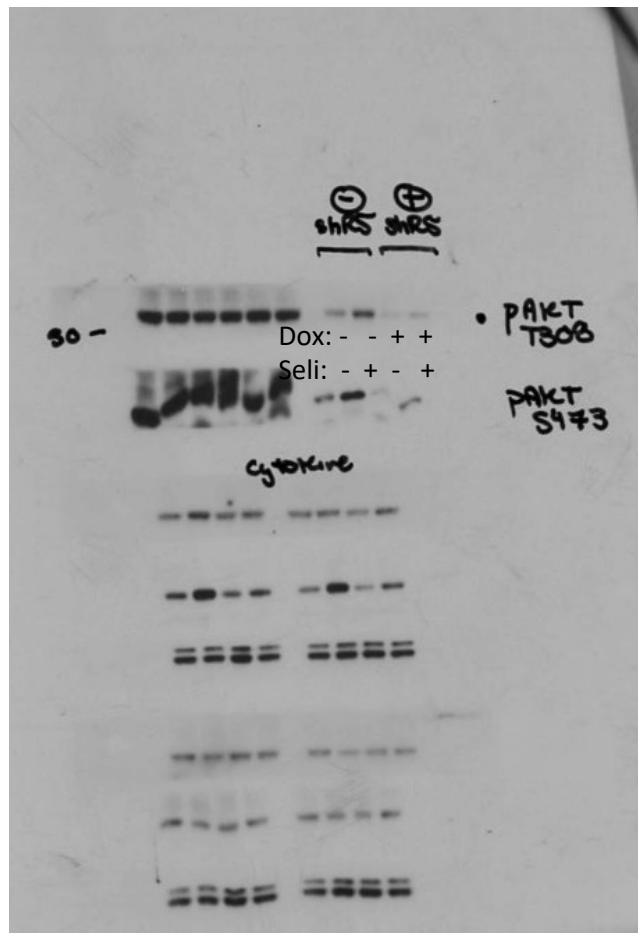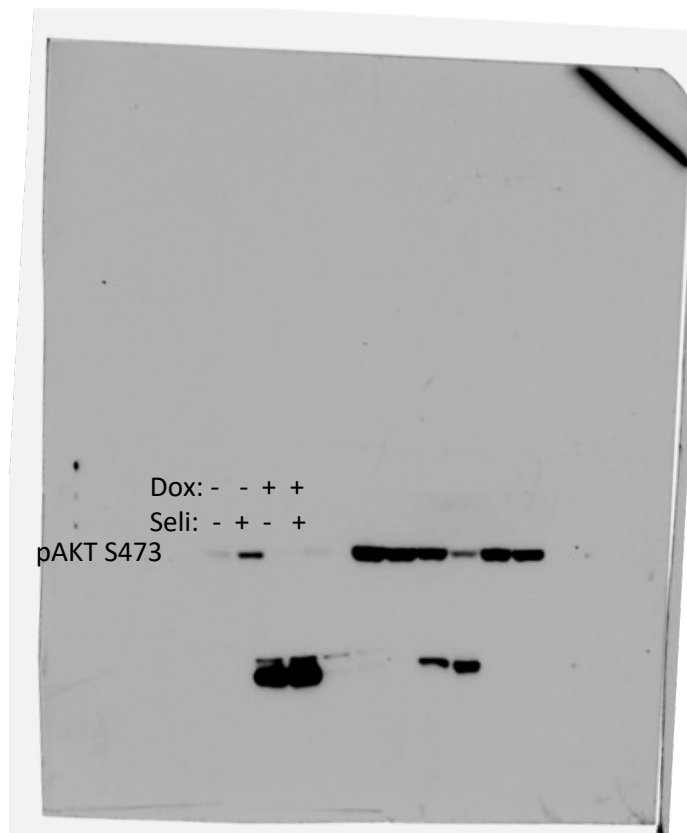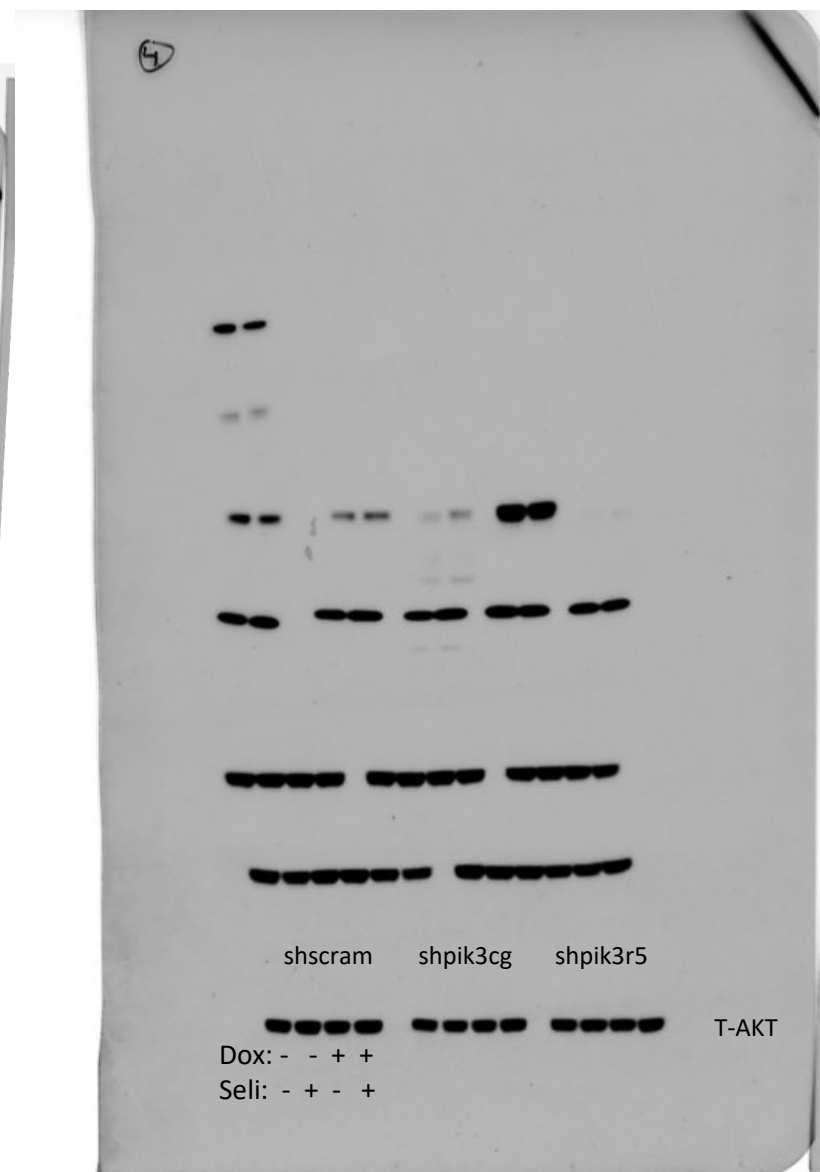

Supplement: NIHMS1868436-supplement-1868436_SD_Fig4.pdf [file NIHMS1868436-supplement-1868436_SD_Fig4.pdf]
