# Supplementary material
Source: PubMed Central journal article supplement (PMC9949365)

Extended Data Figure 2  
Panel A

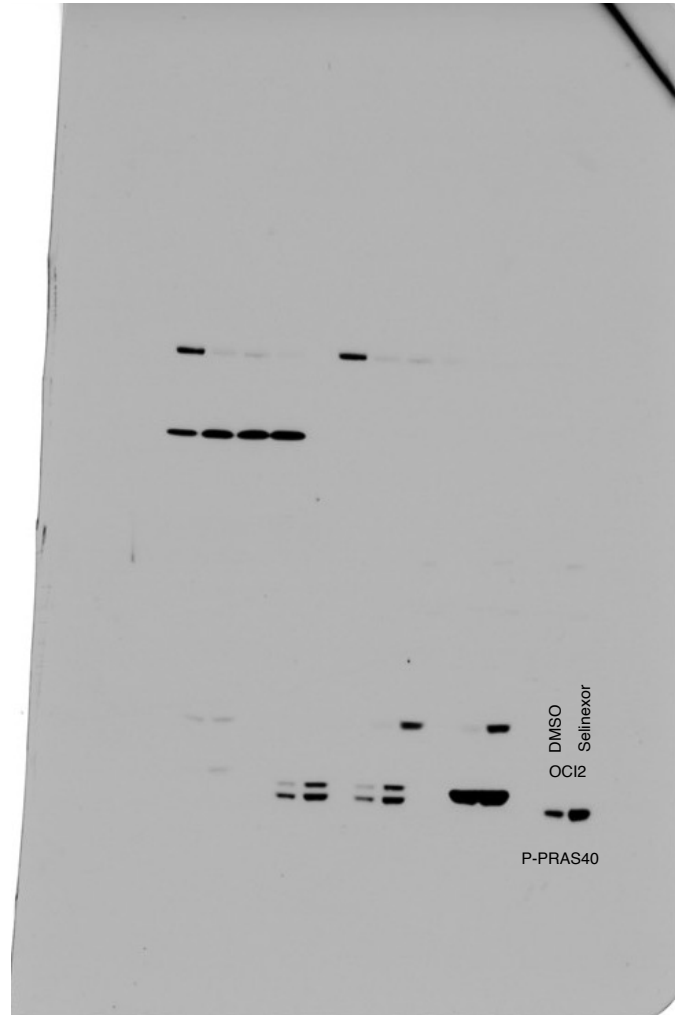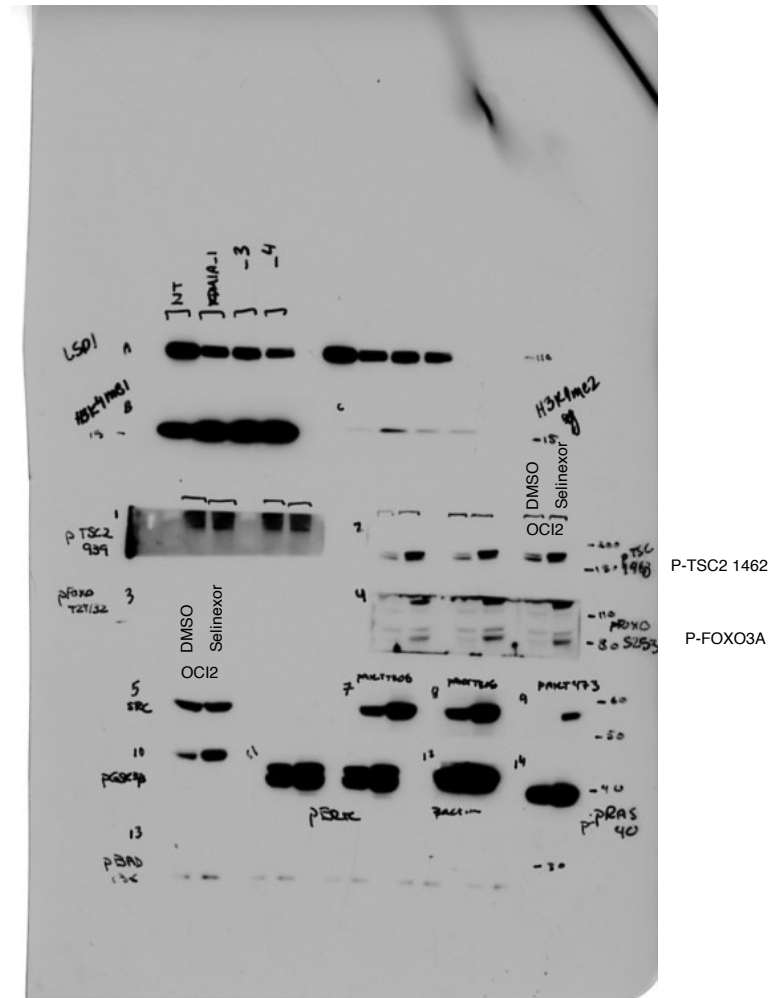

Panel B

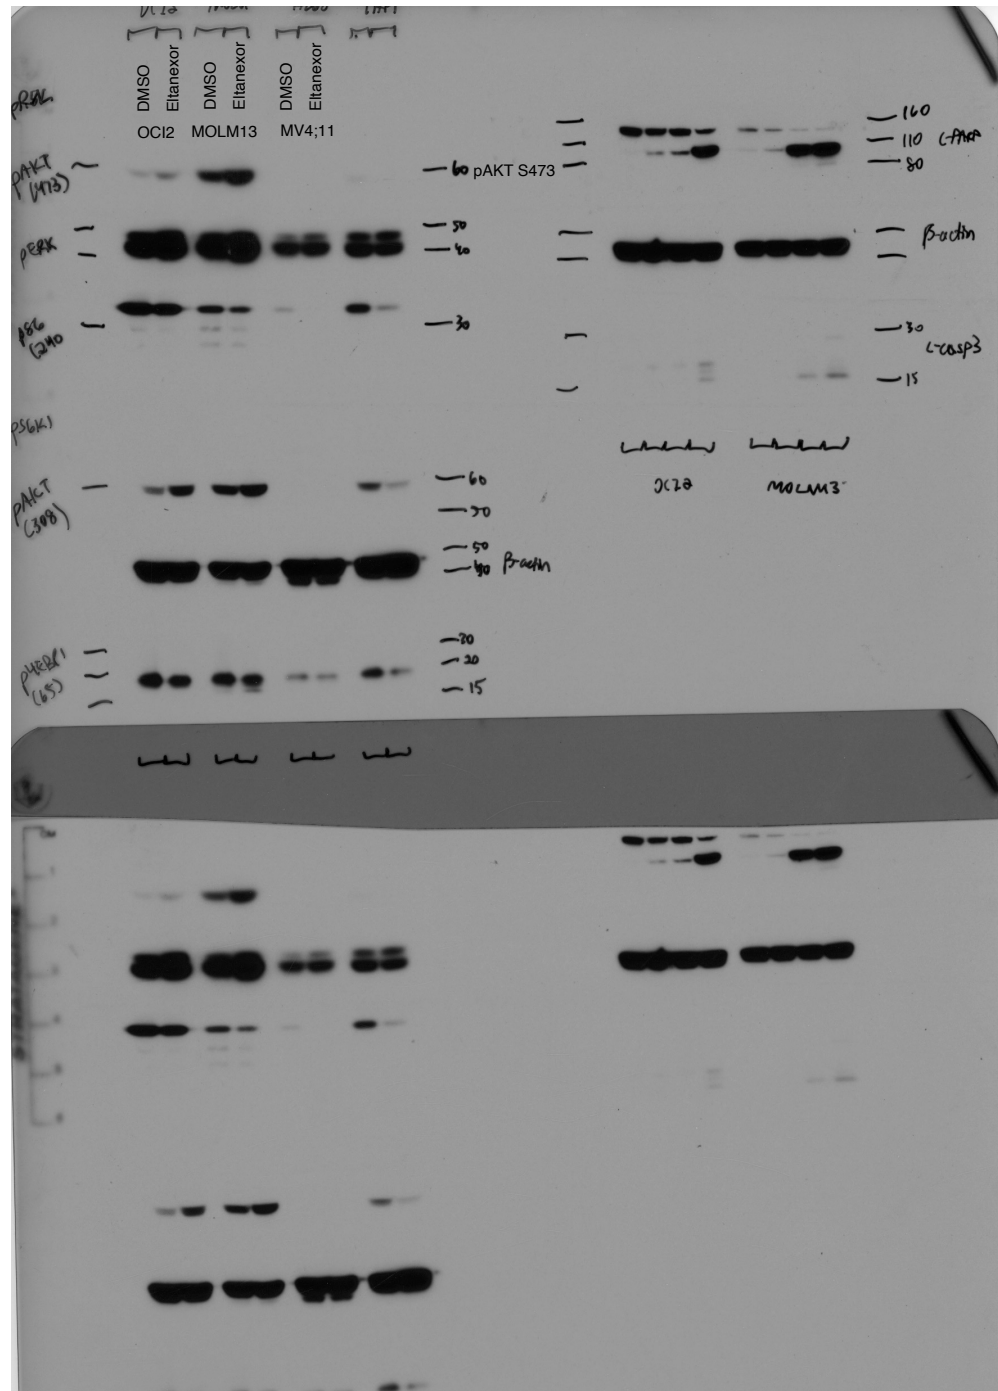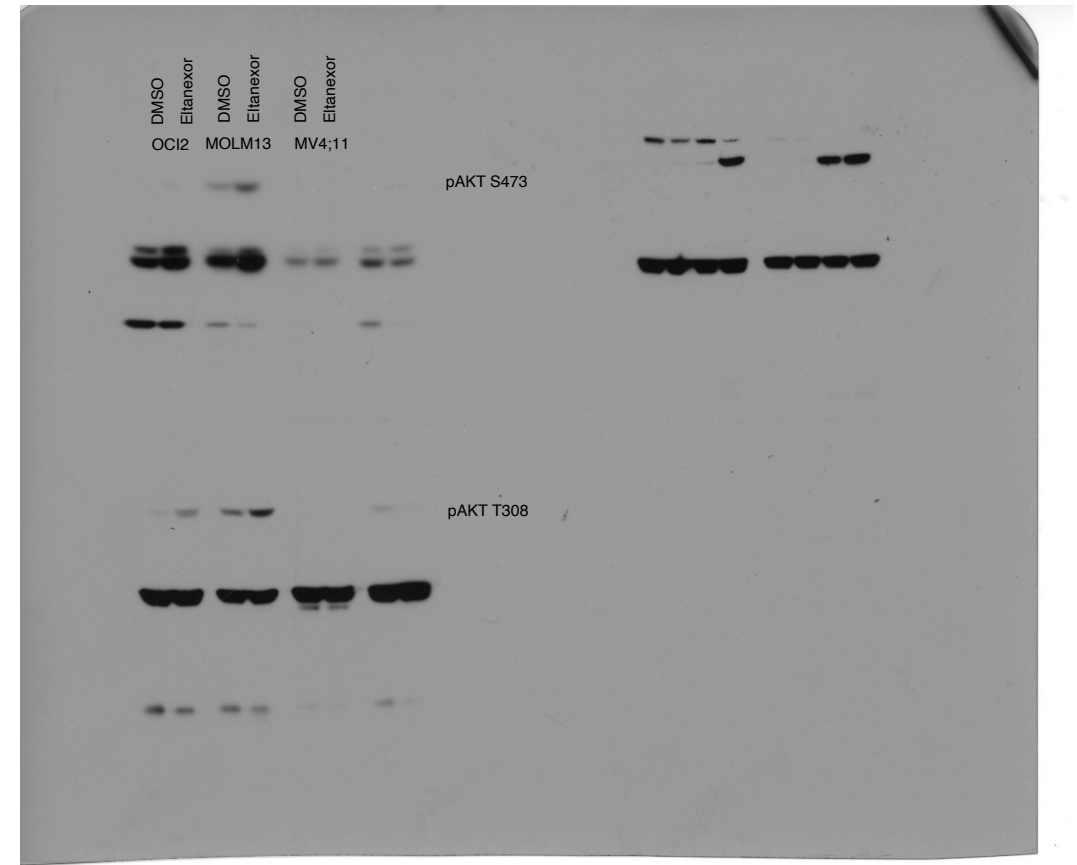

Panel C

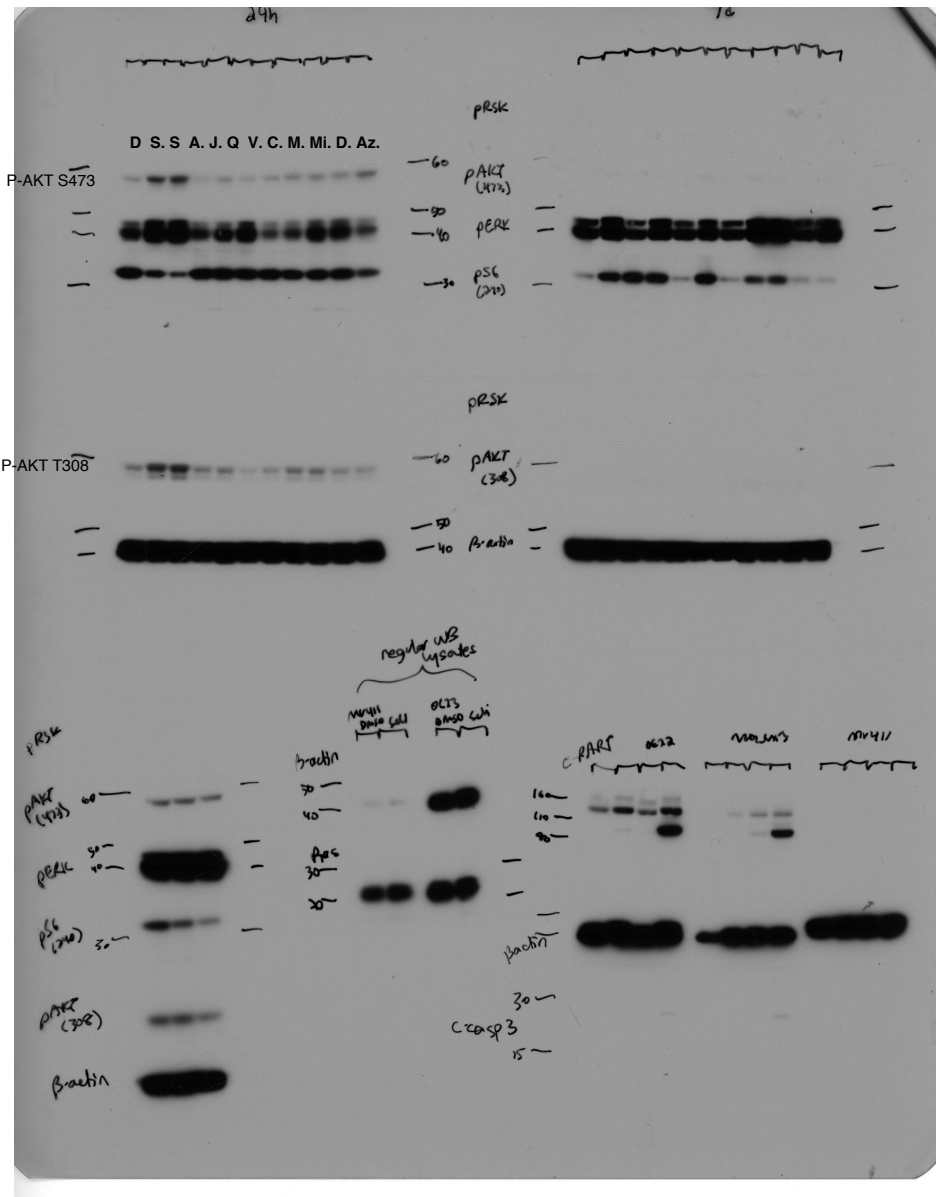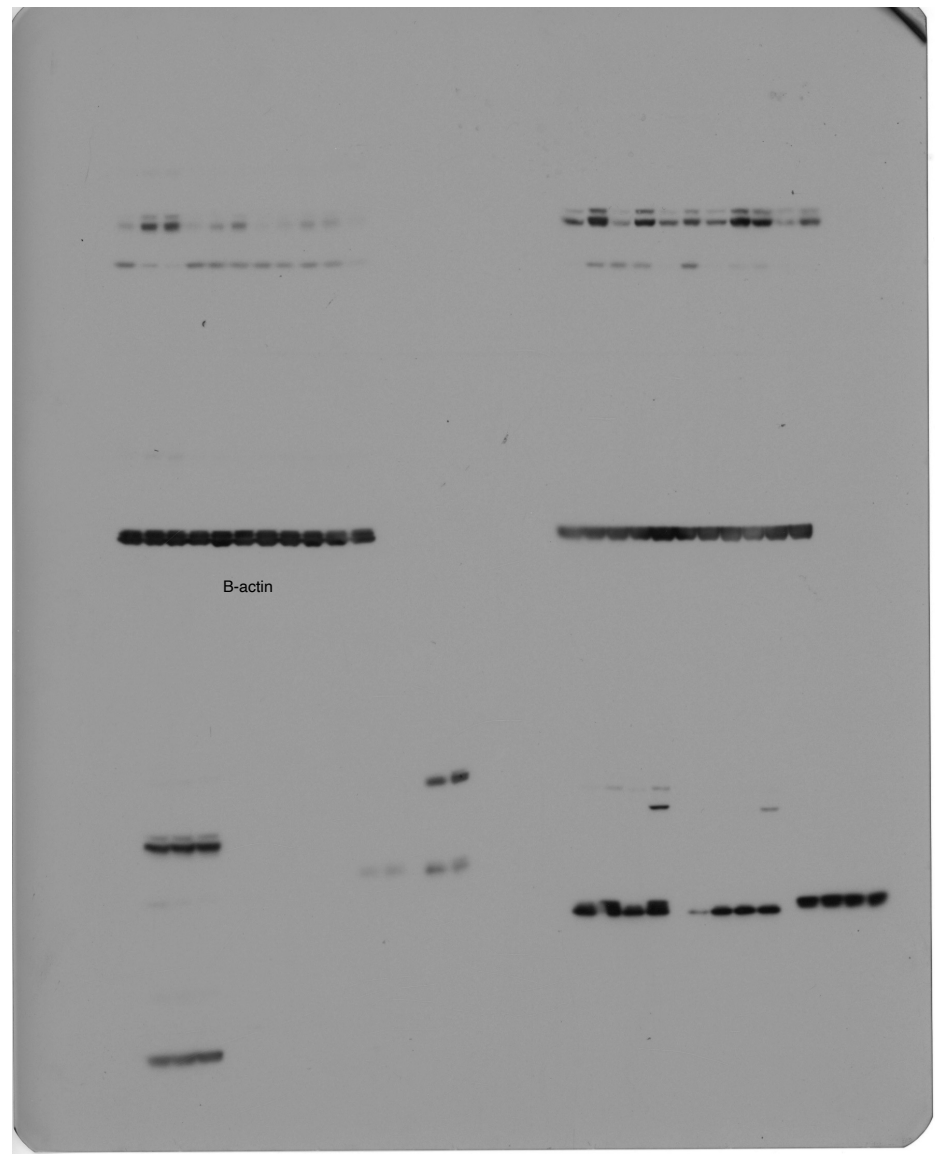

Supplement: NIHMS1868436-supplement-1868436_SD_ED_Fig2.pdf [file NIHMS1868436-supplement-1868436_SD_ED_Fig2.pdf]

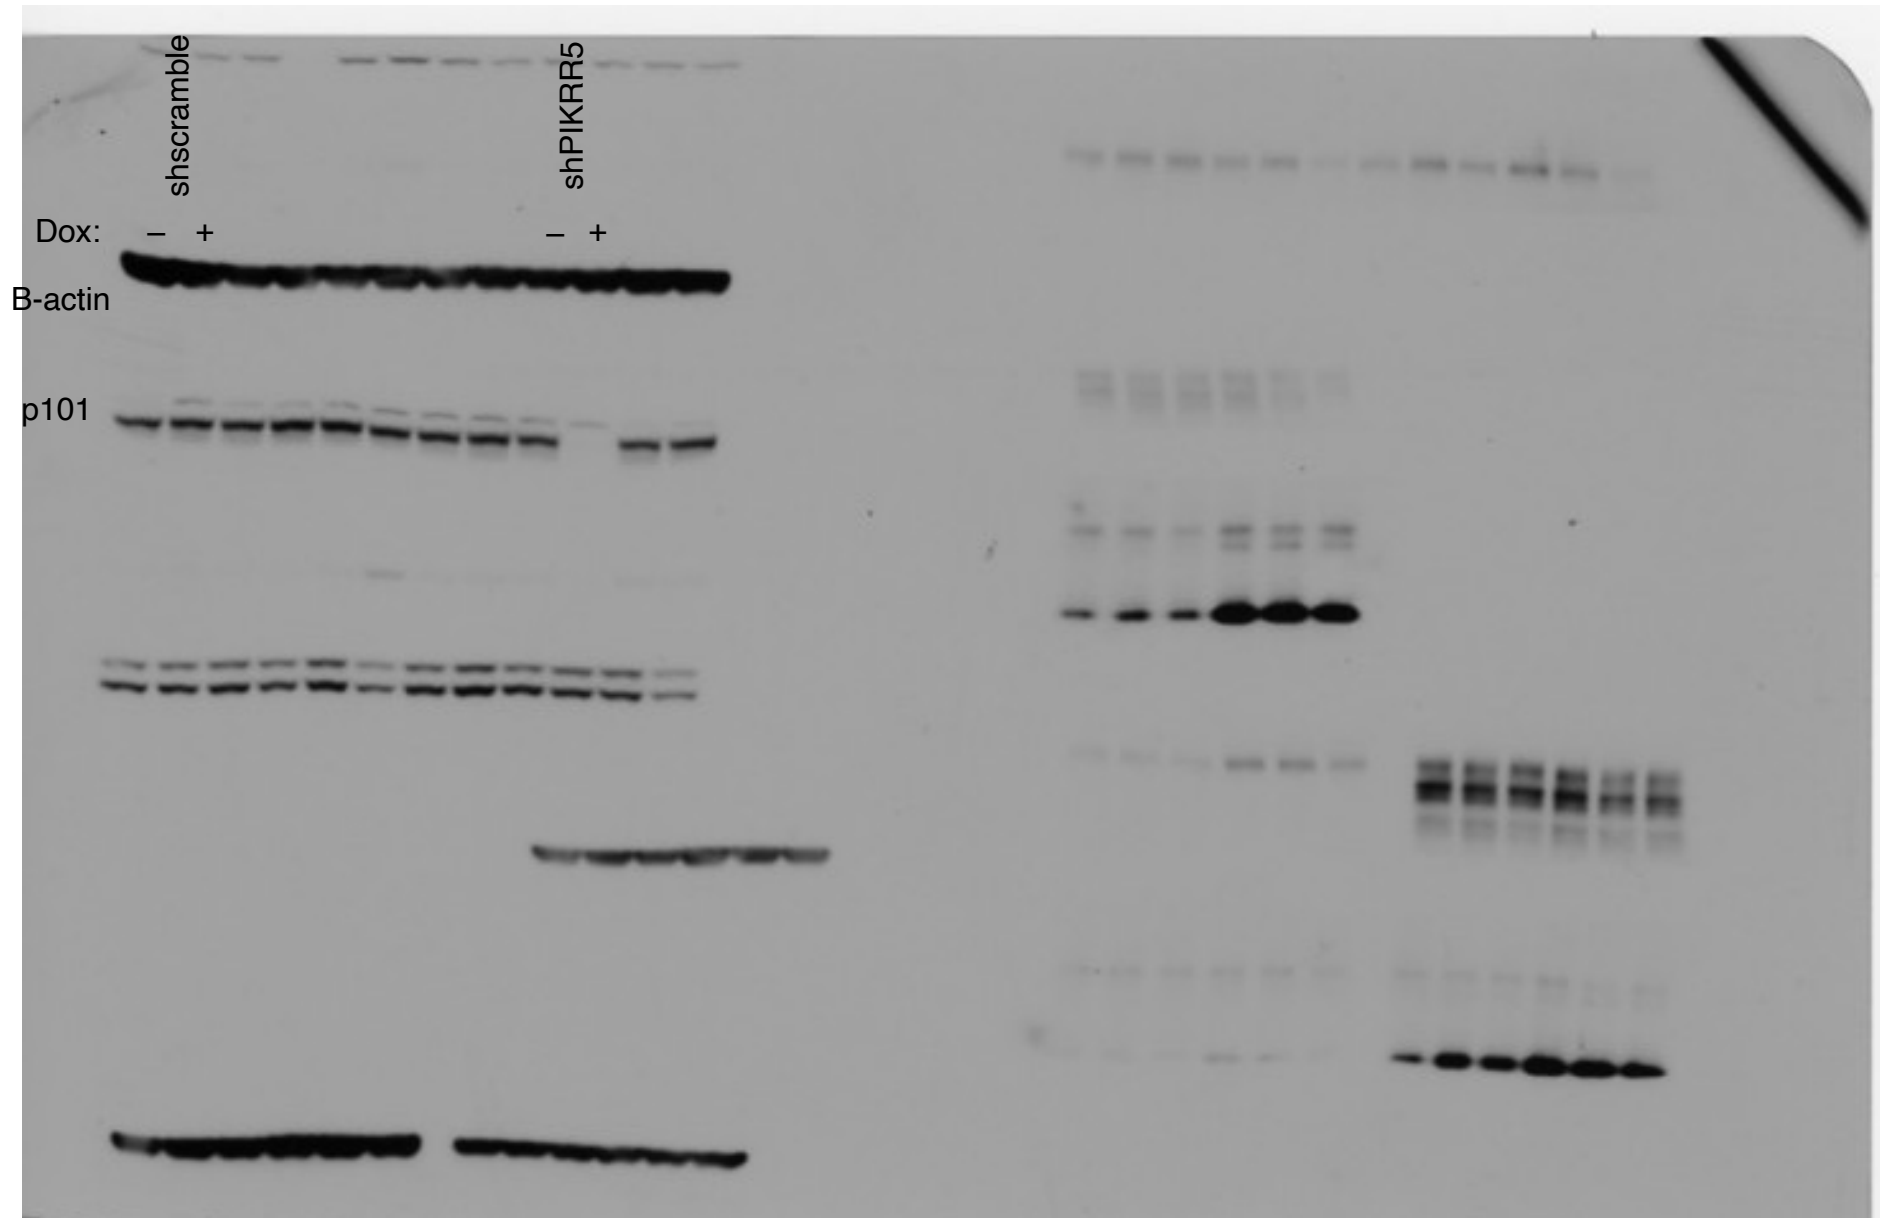

Panel A, C

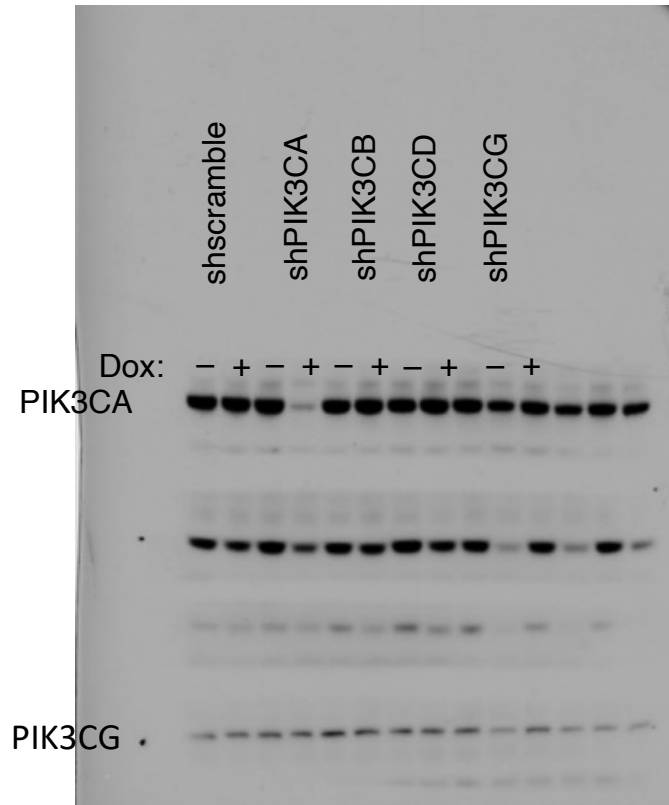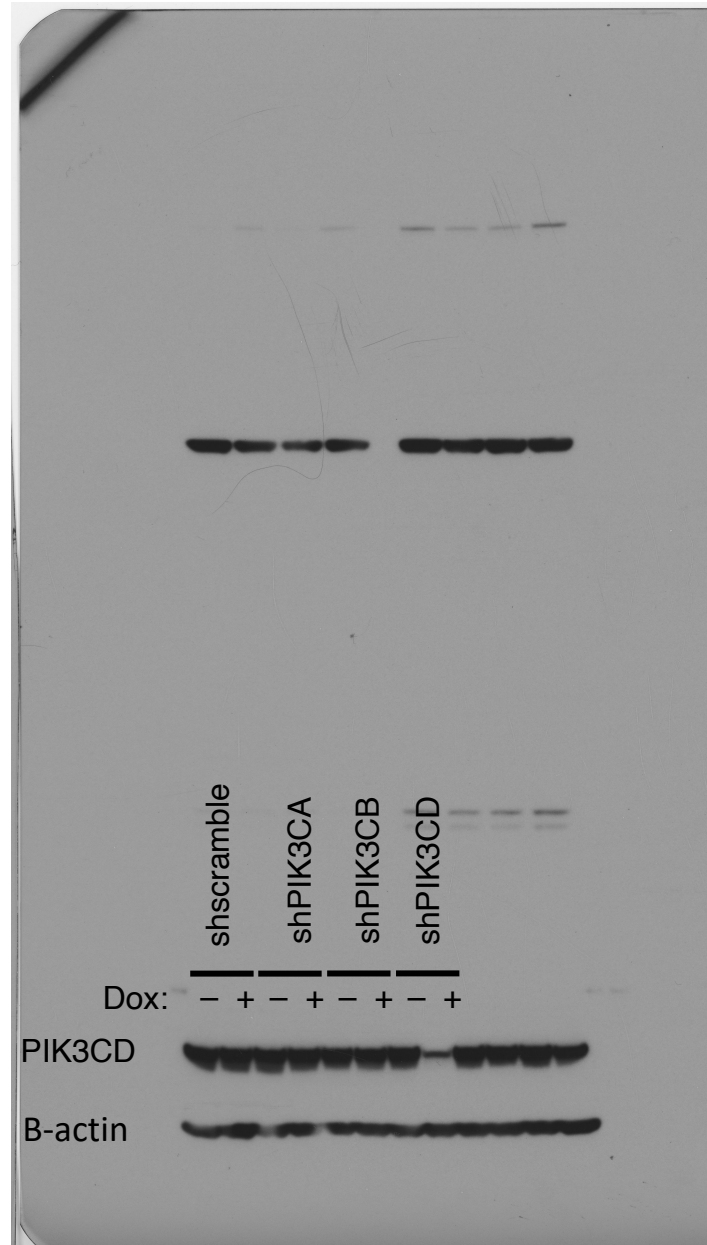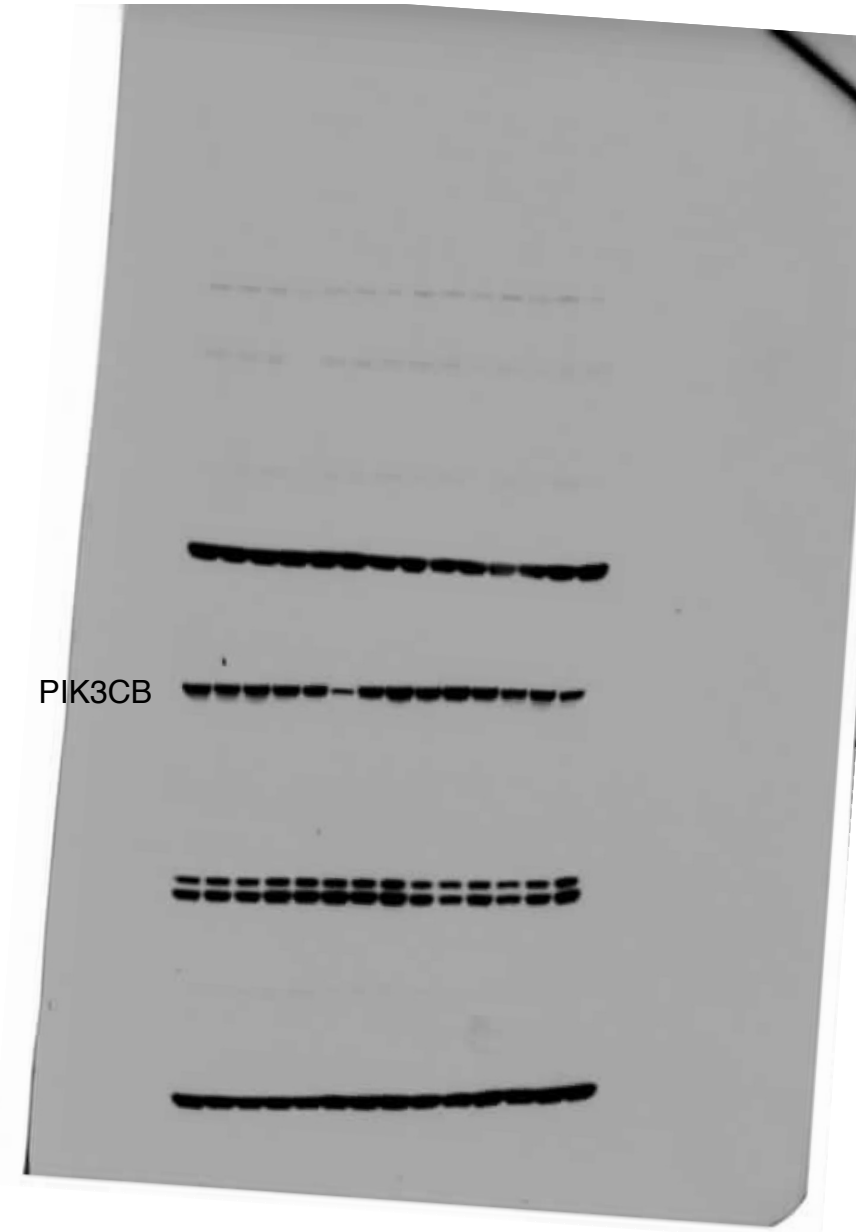

Panel B

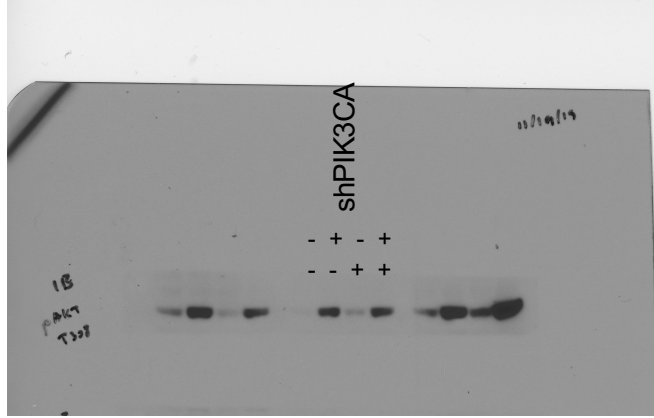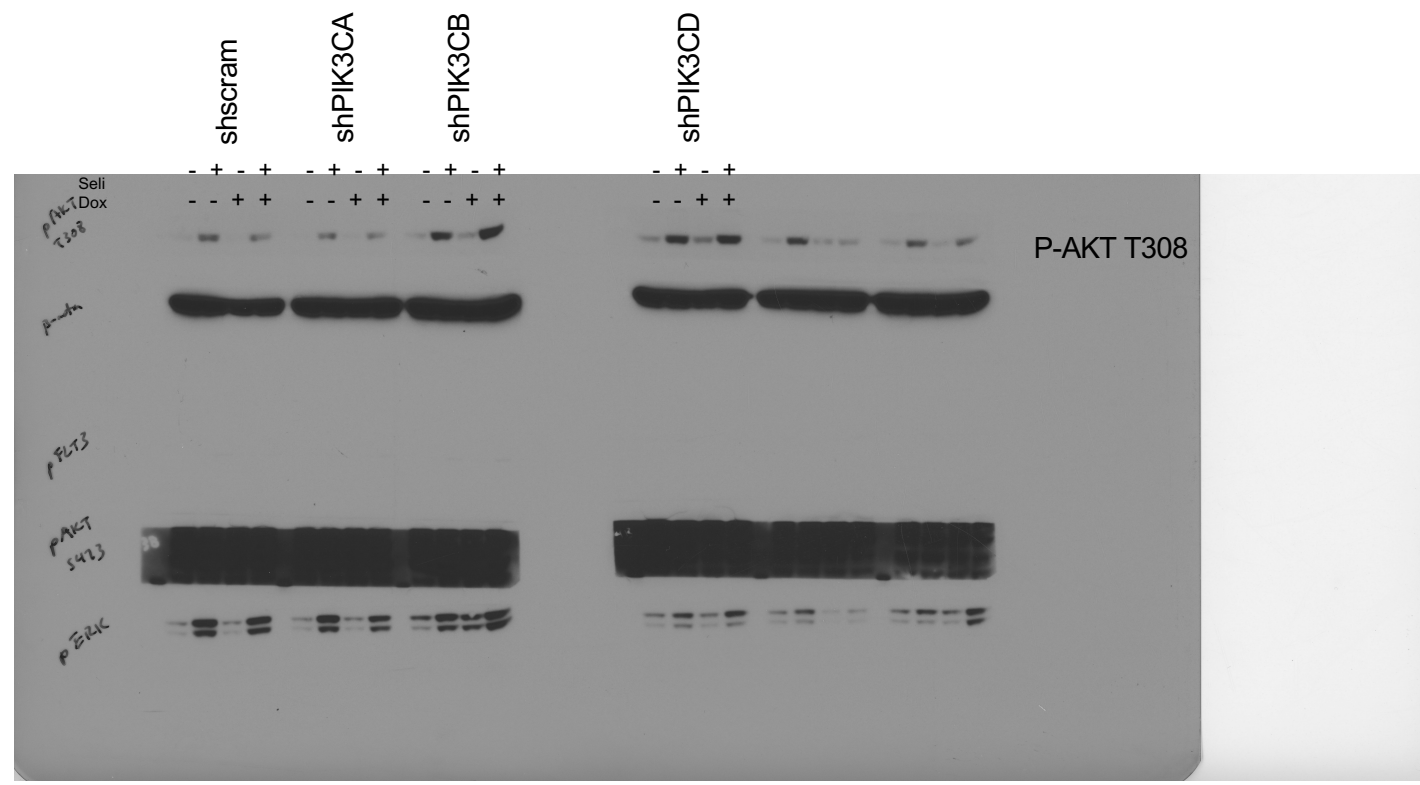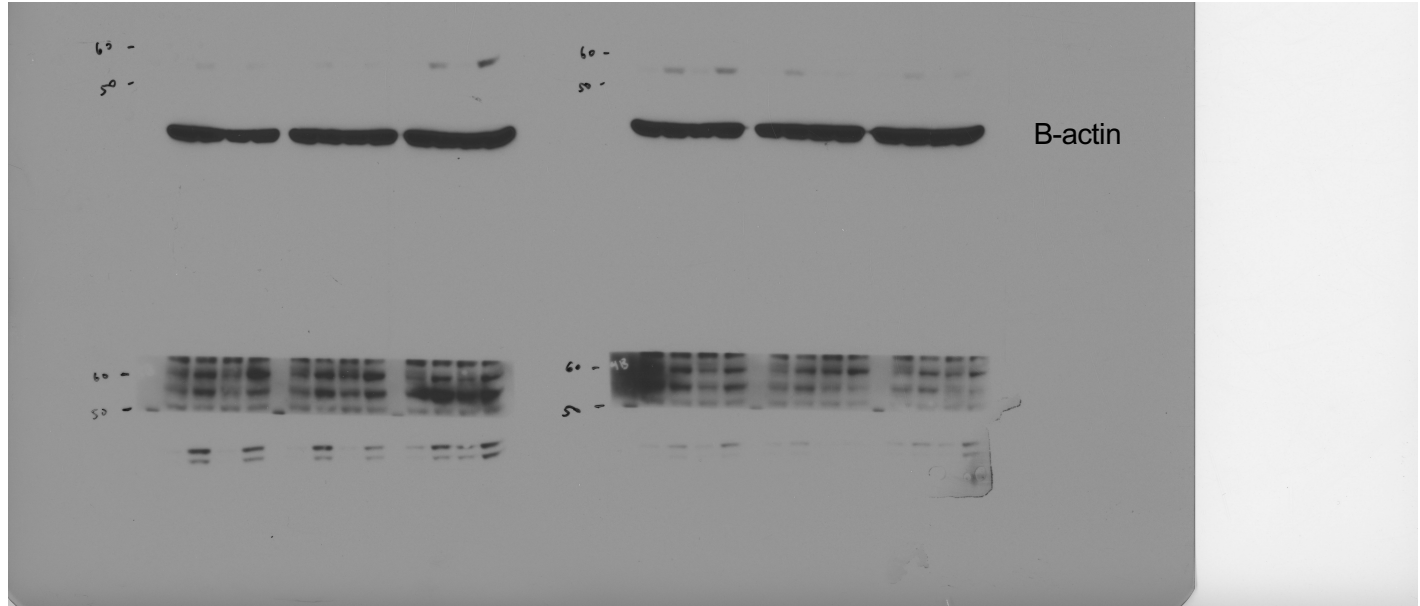

Panel B

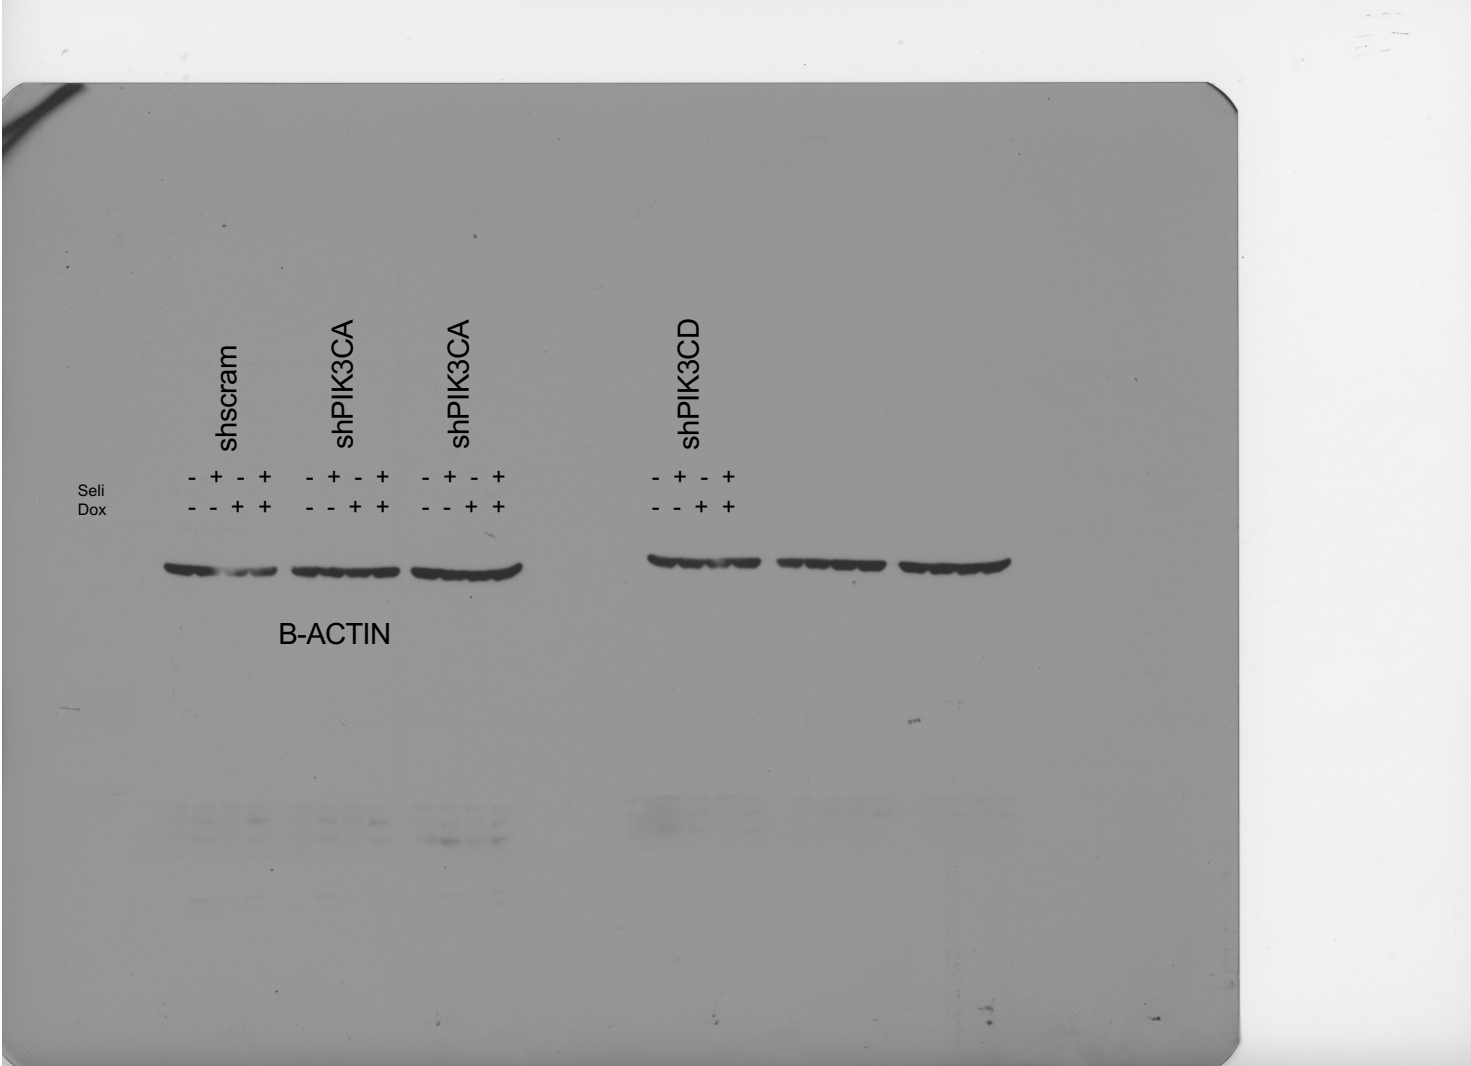



Panel C

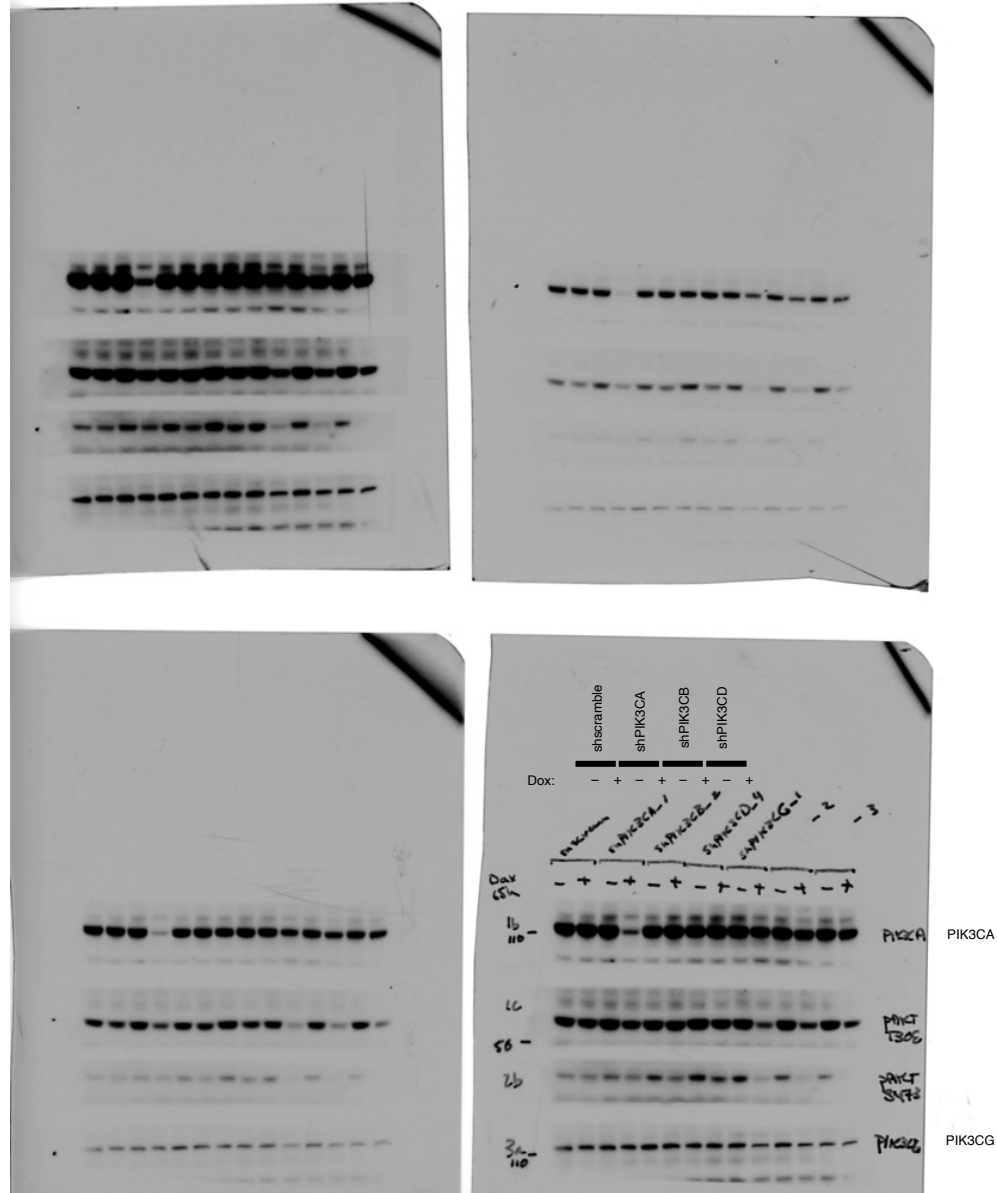

Panel D

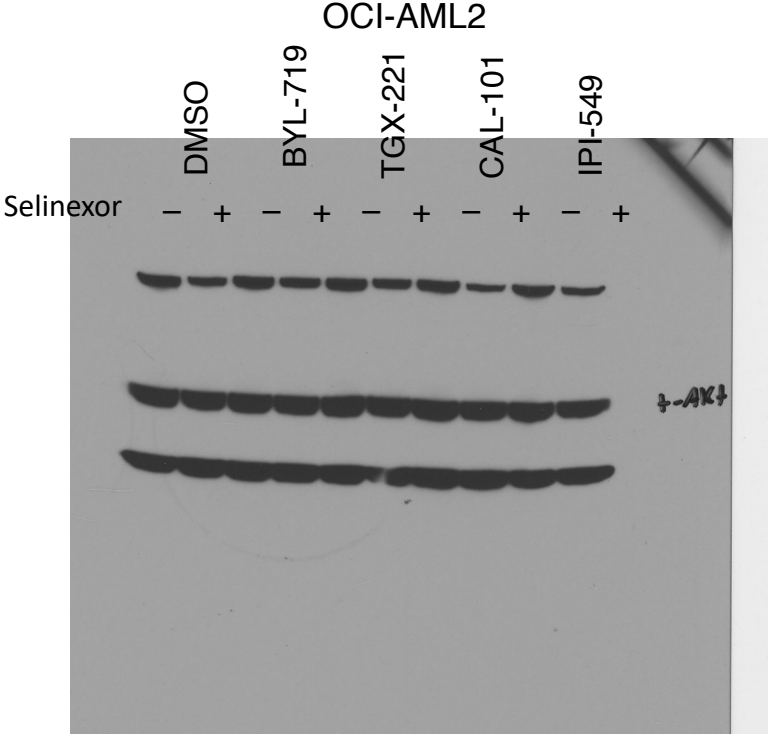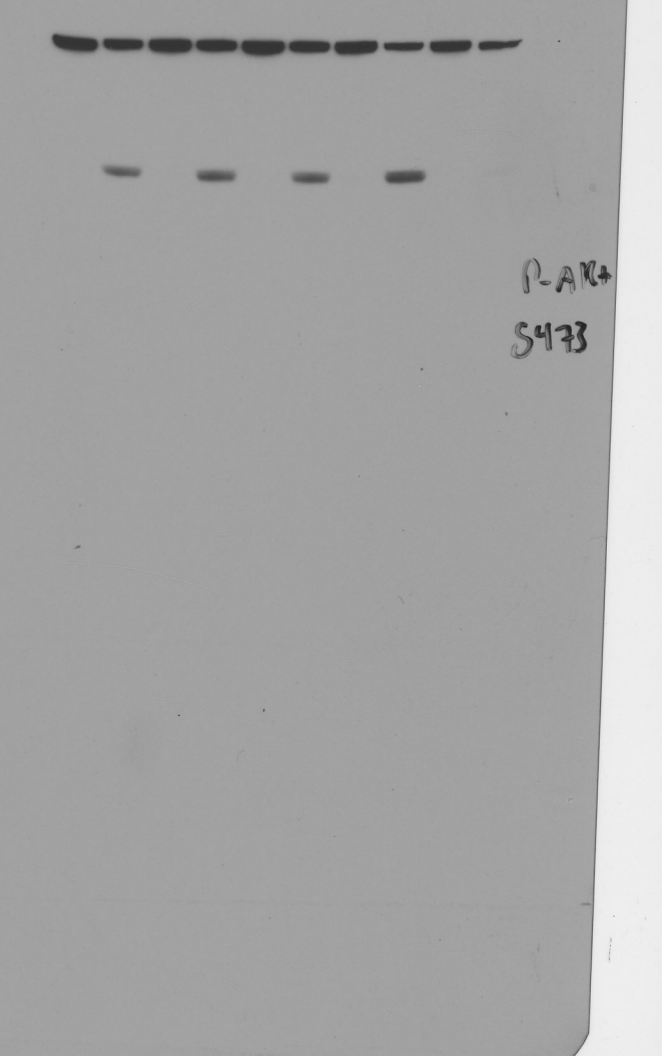

Panel D

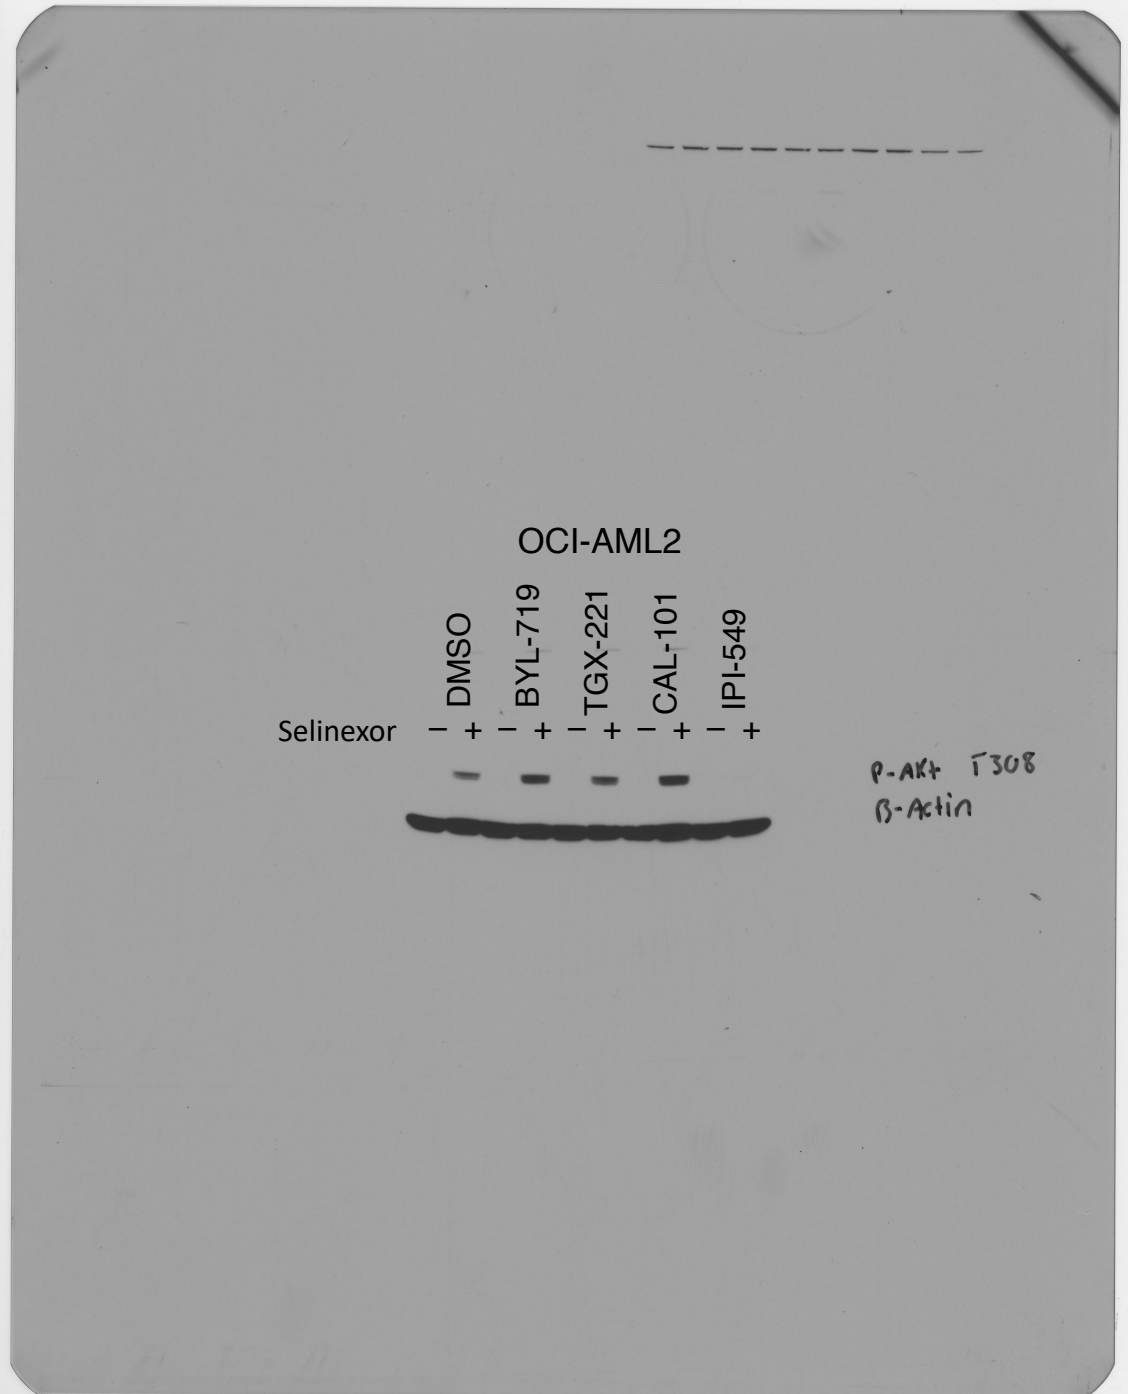

Panel D

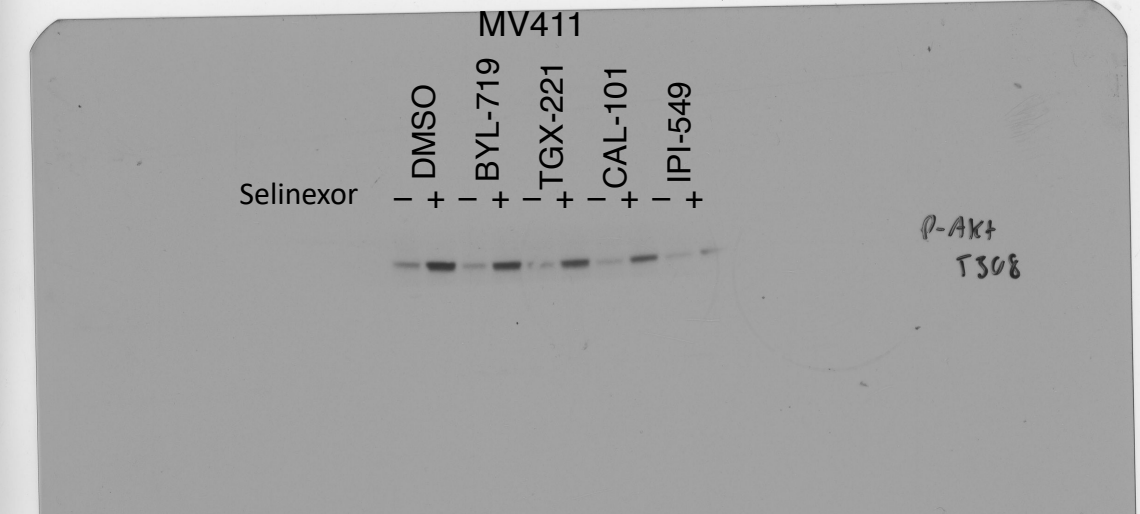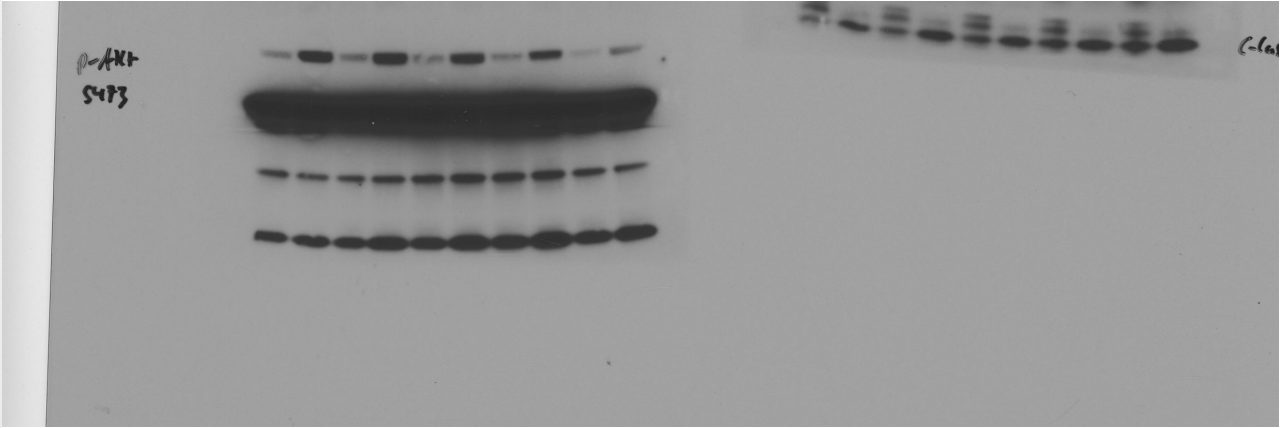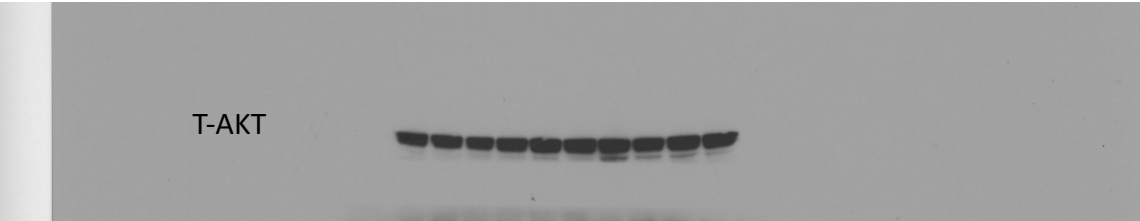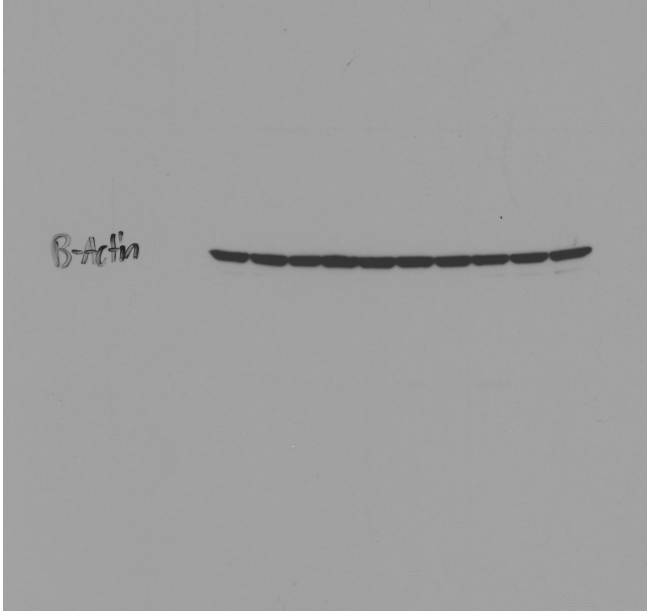

Panel D

P-AKT S473

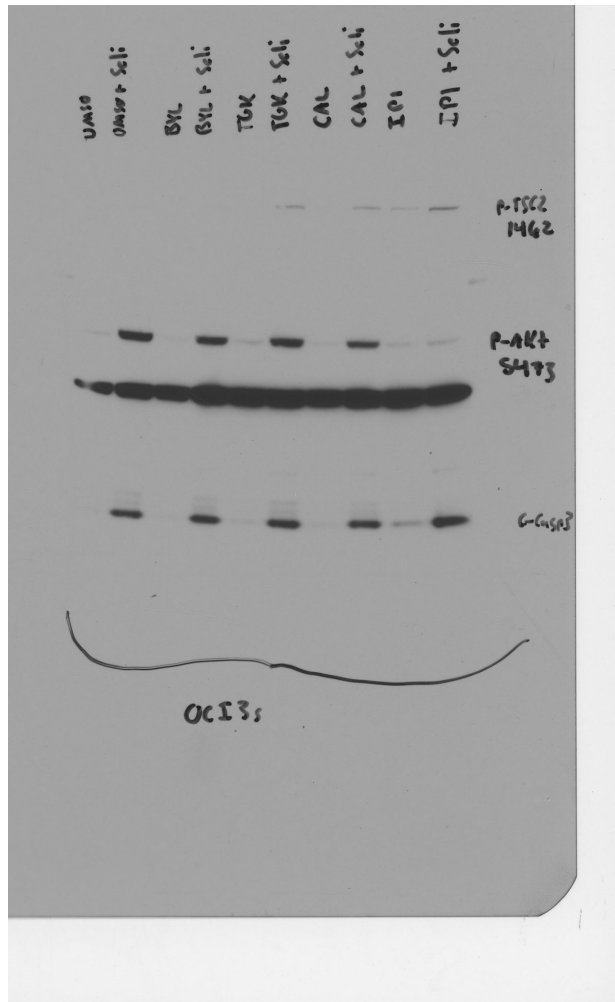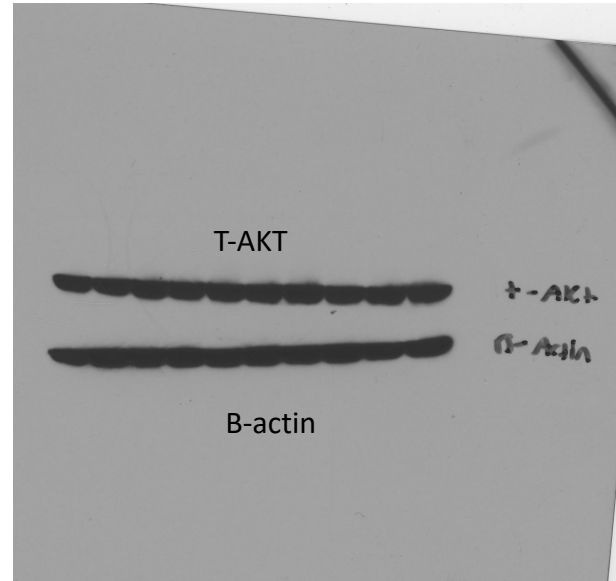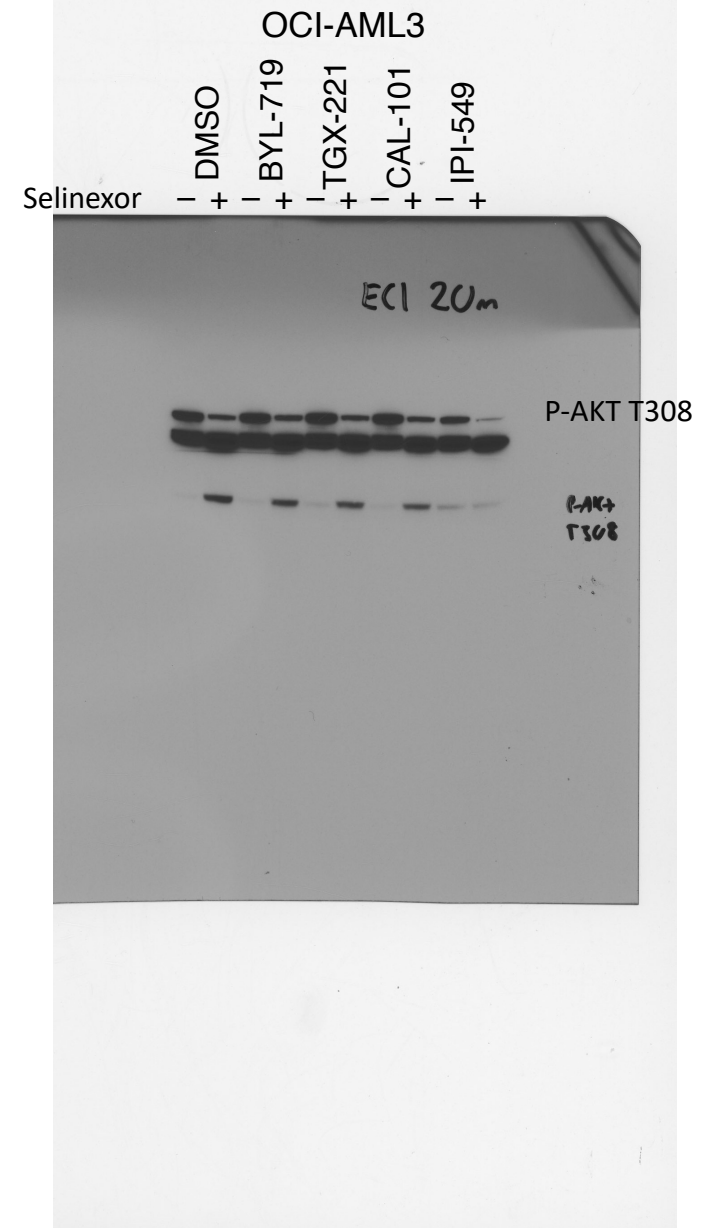

Panel E

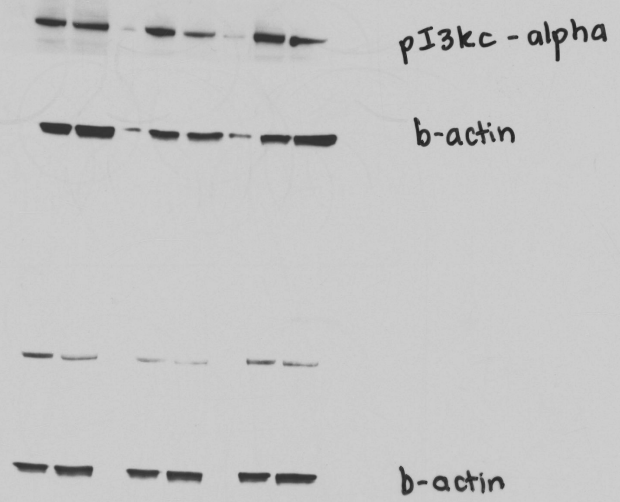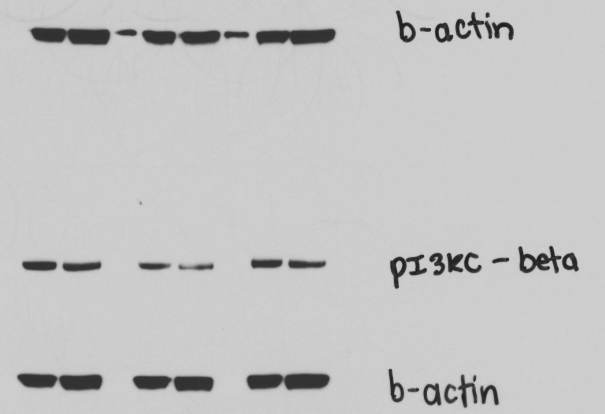

Panel F

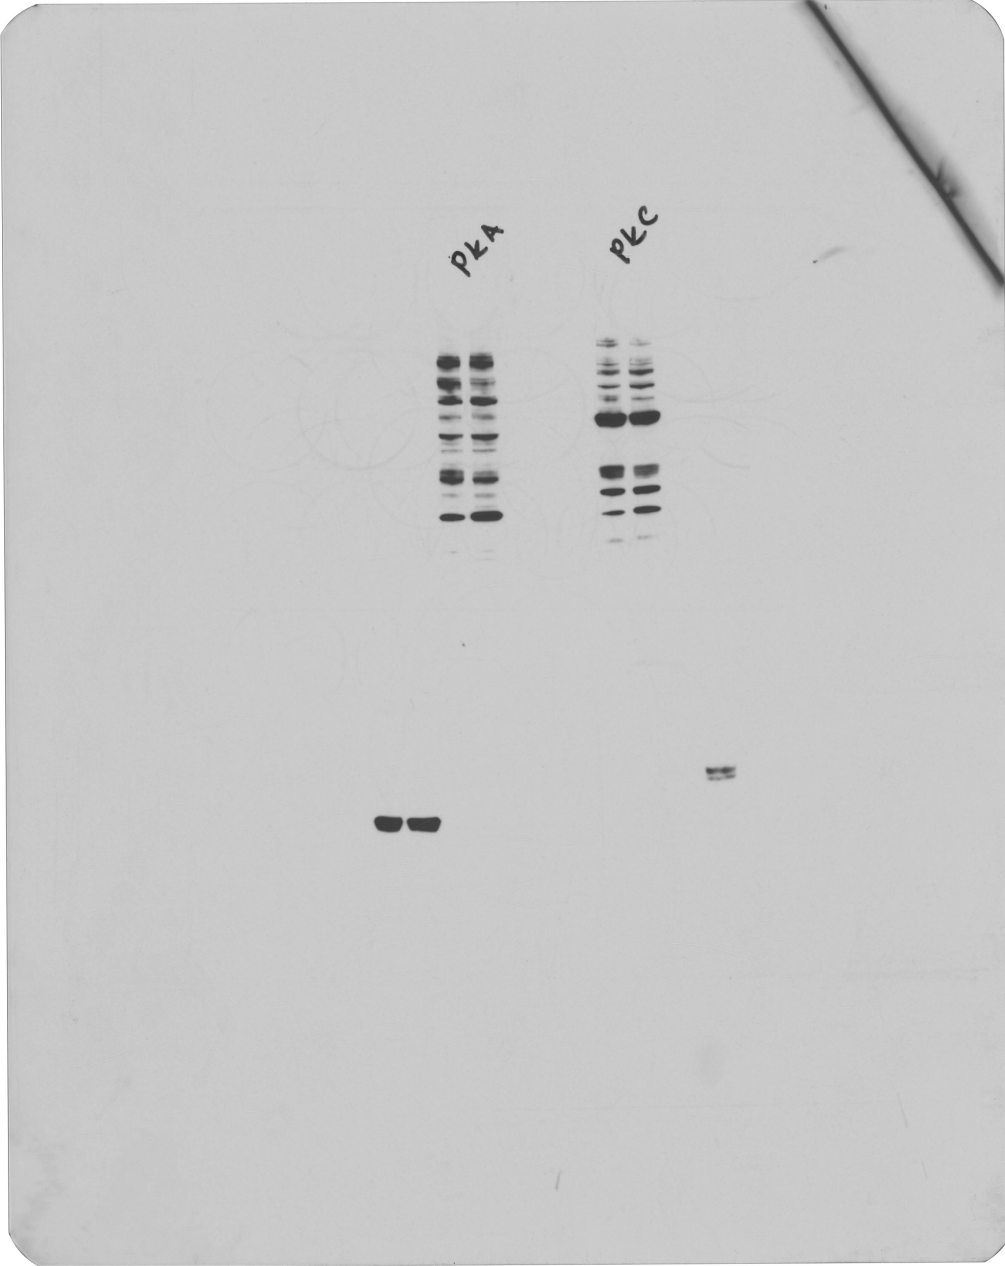

Supplement: NIHMS1868436-supplement-1868436_SD_ED_Fig5.pdf [file NIHMS1868436-supplement-1868436_SD_ED_Fig5.pdf]

Extended Data Figure 6  
Panel A

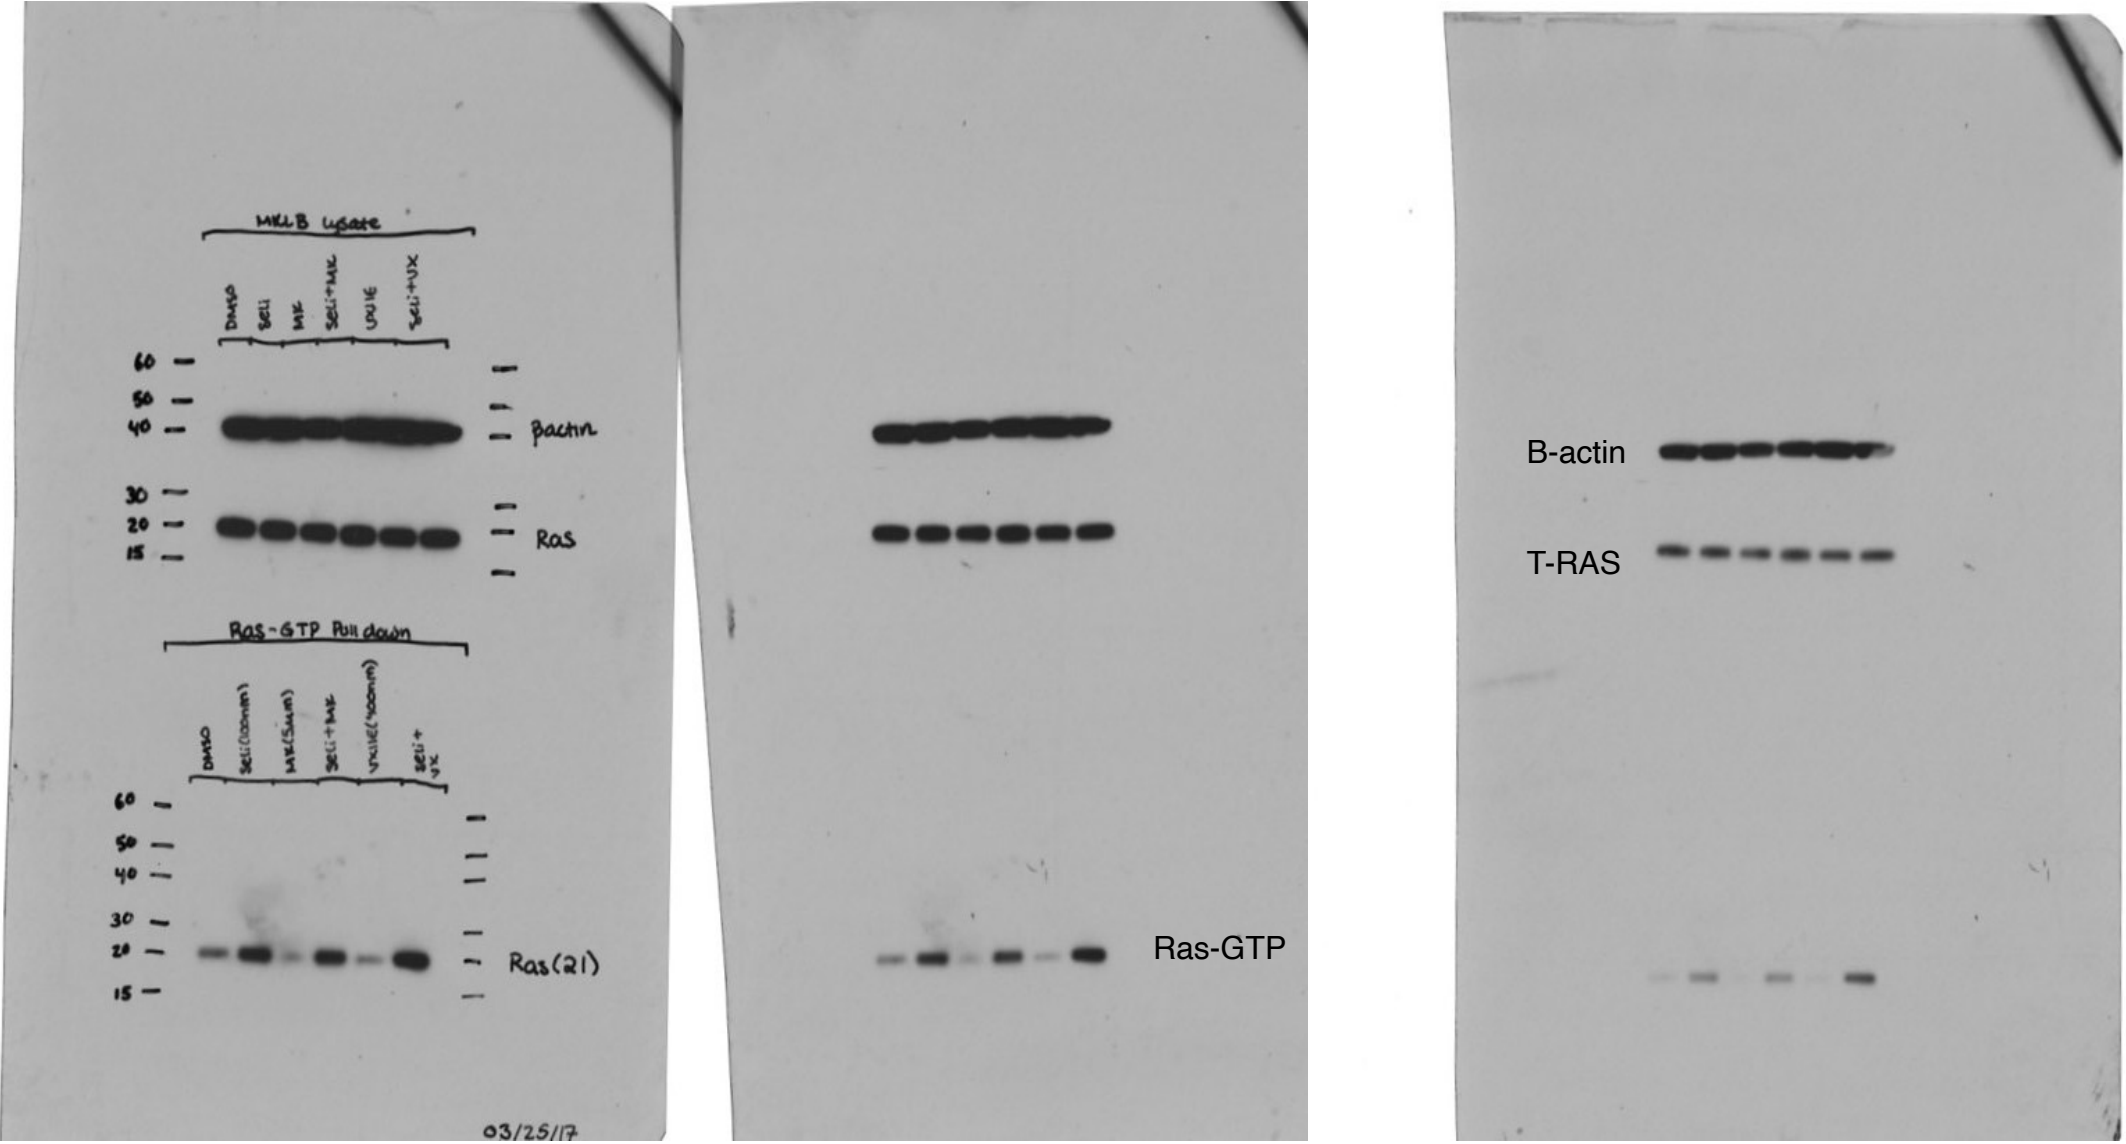

Panel B

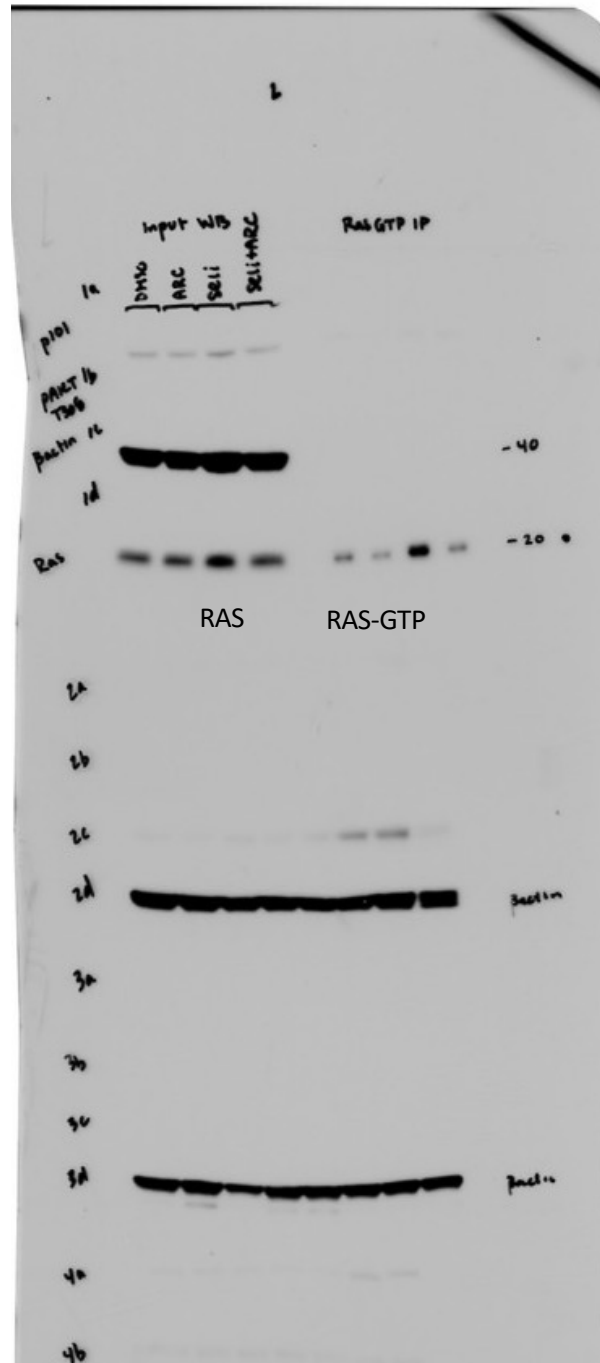

Panel C

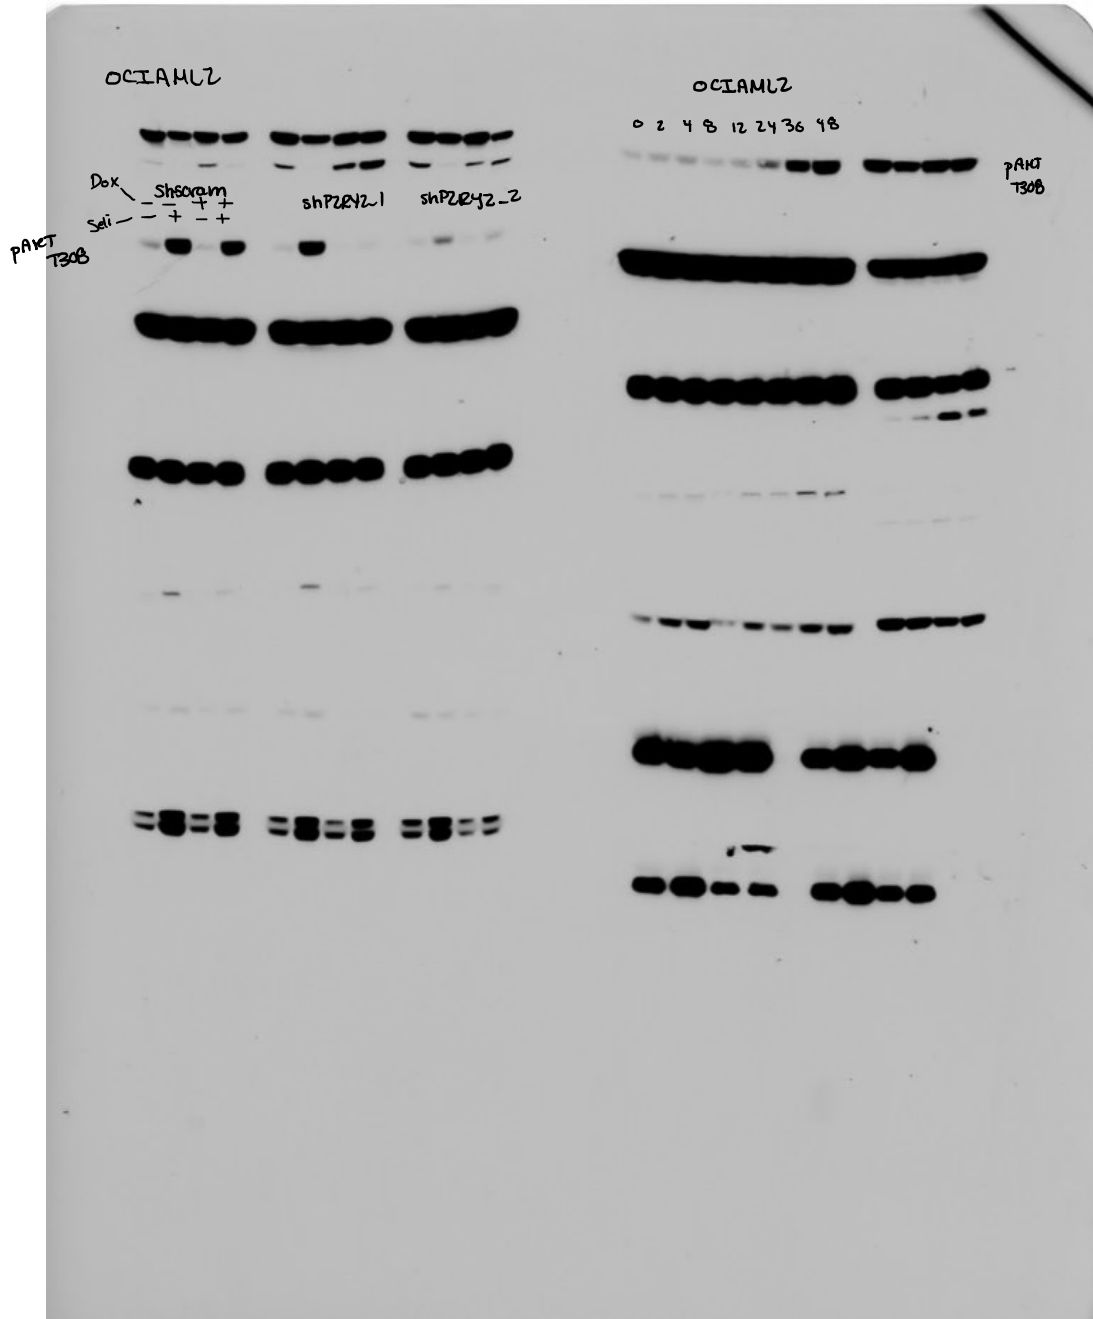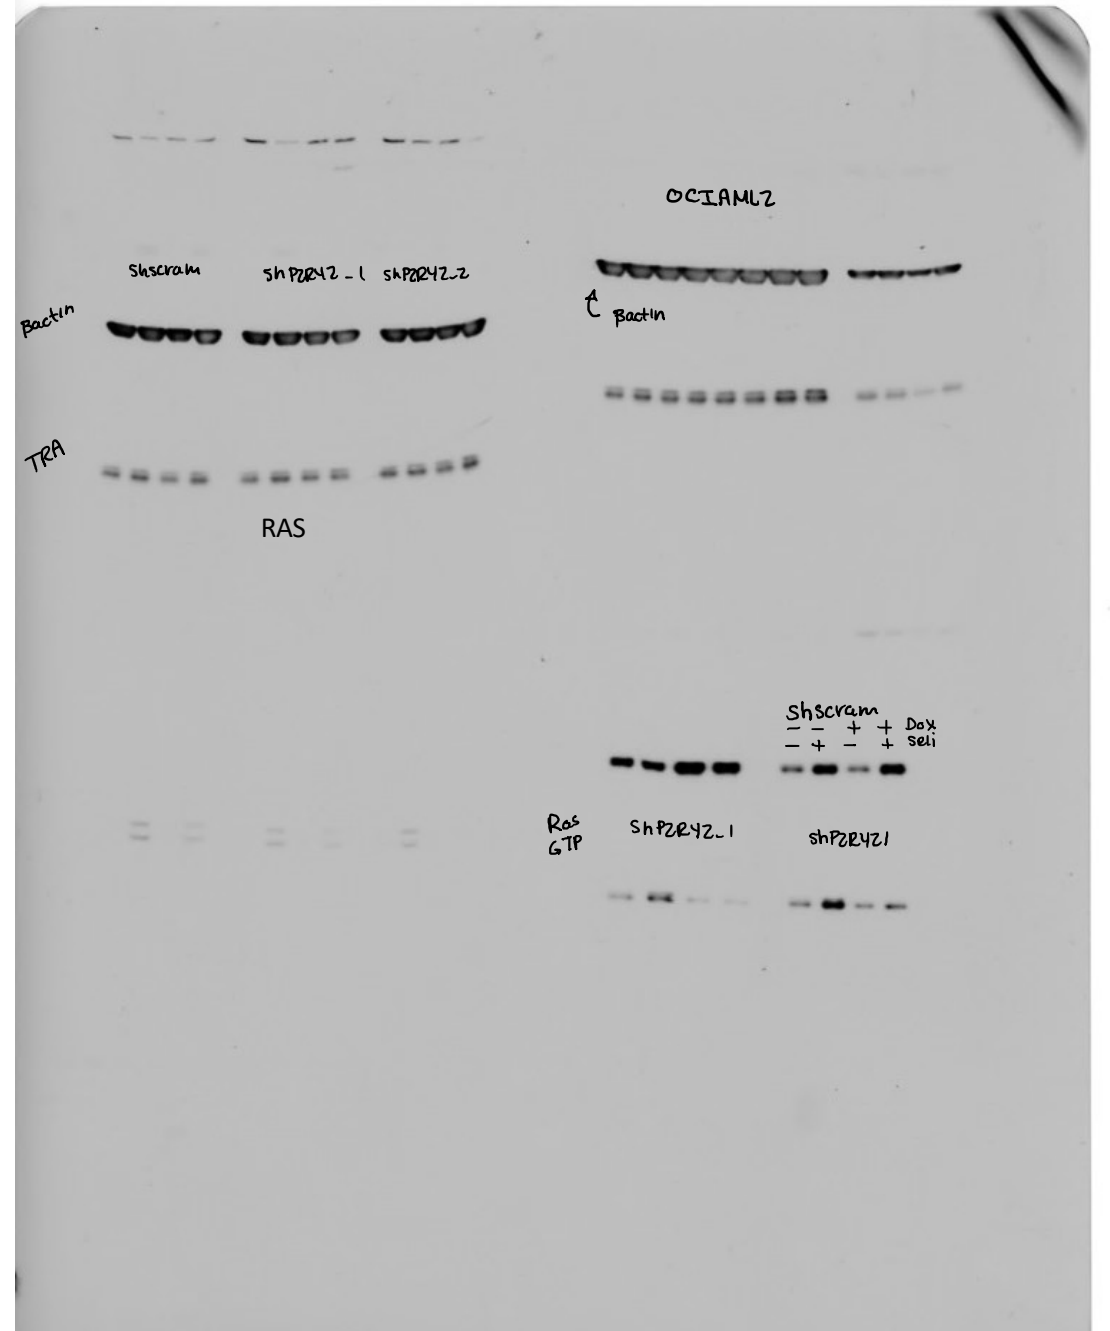

Panel D,E

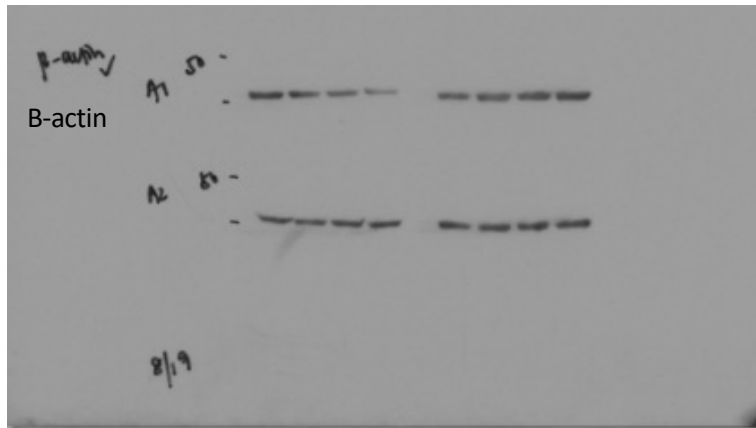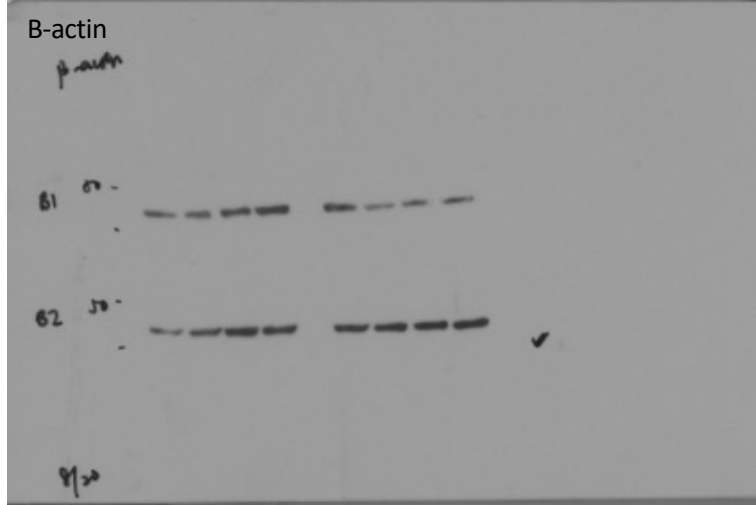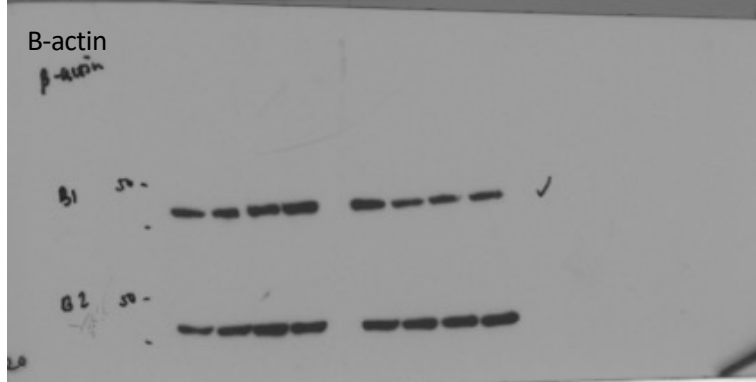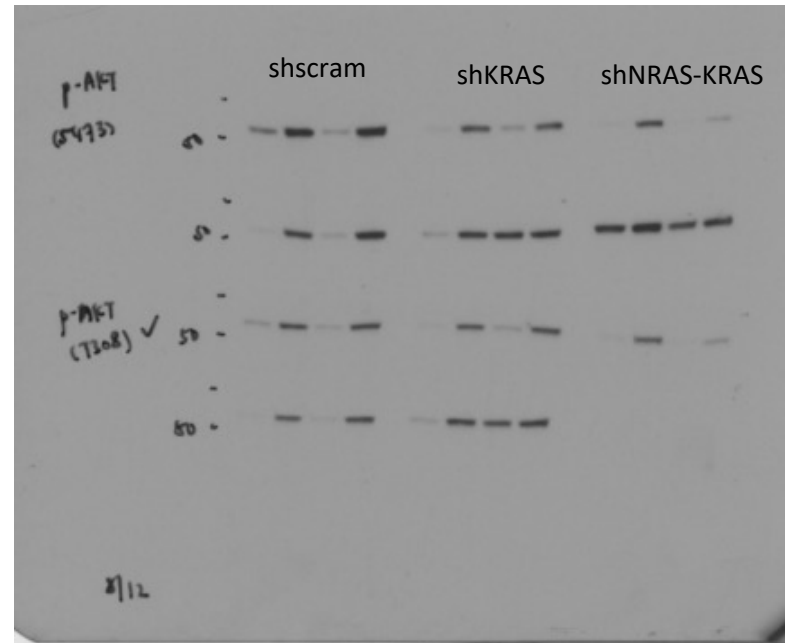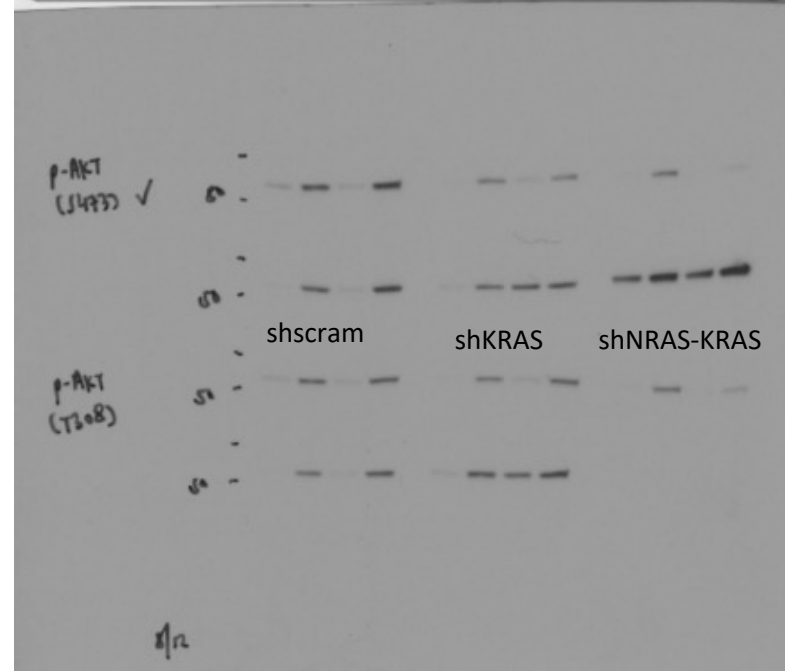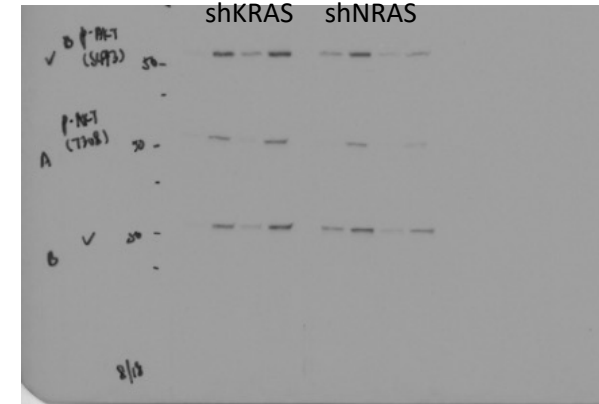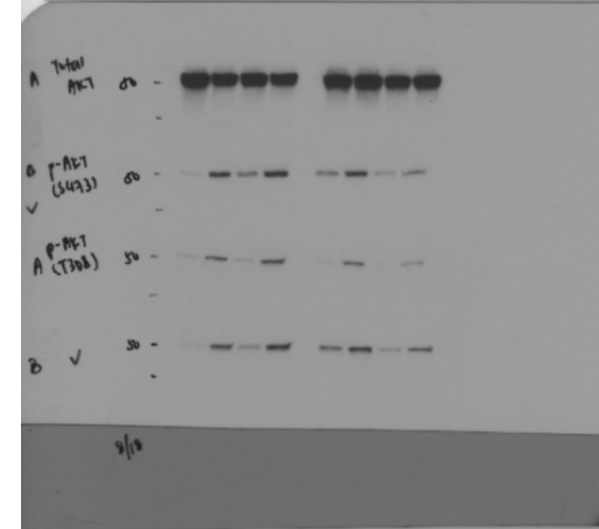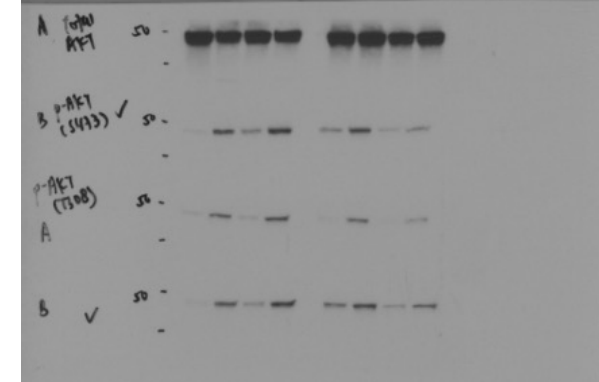

Panel D,E

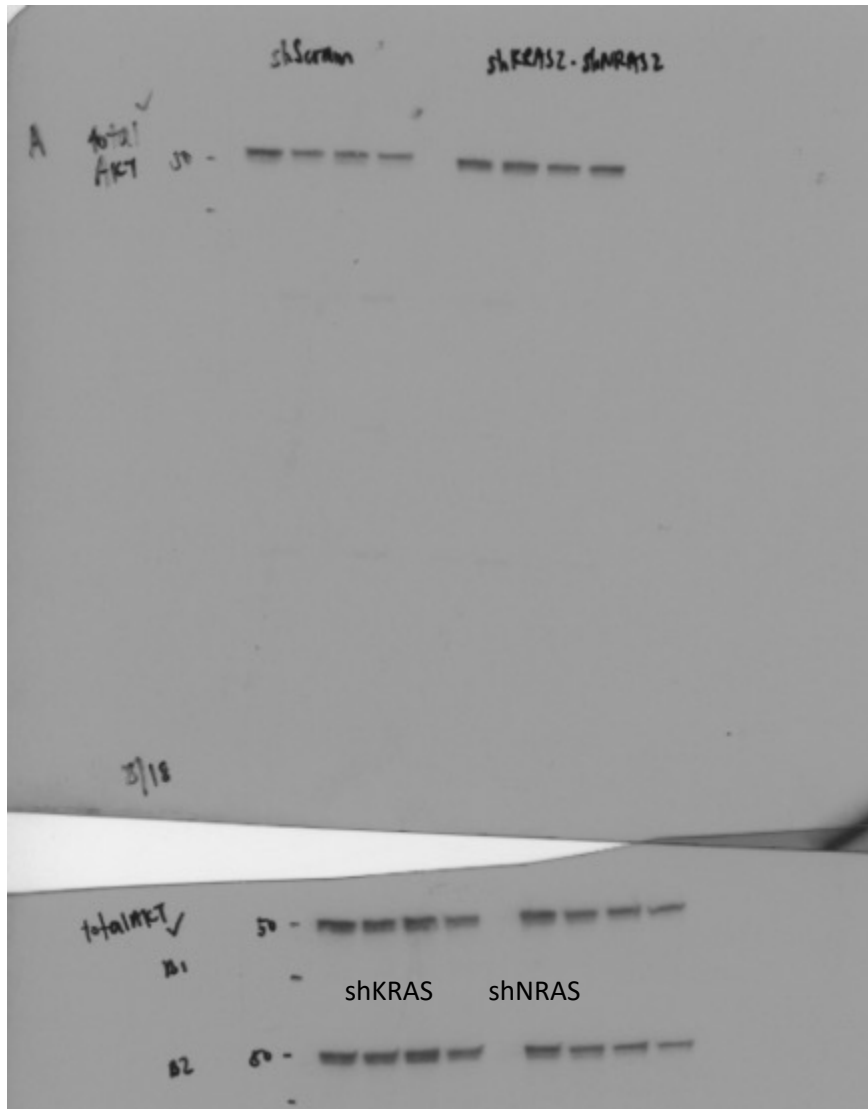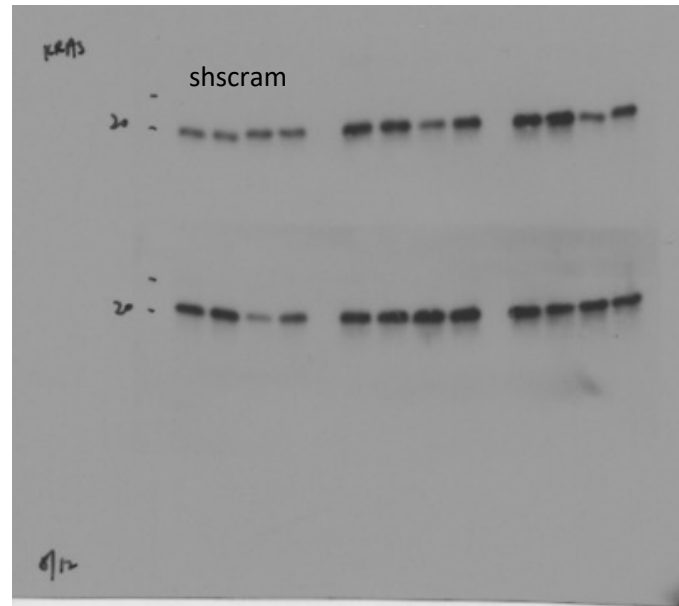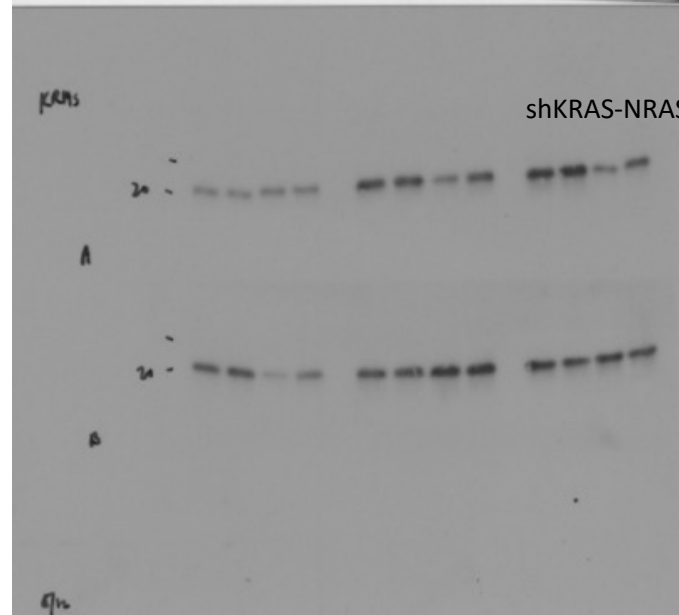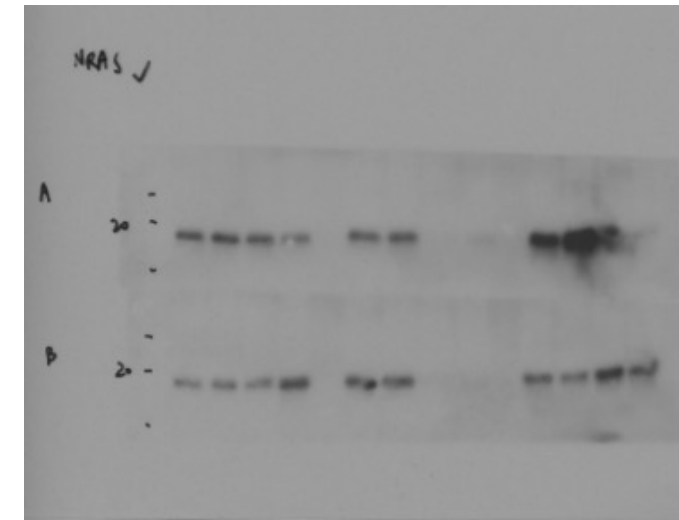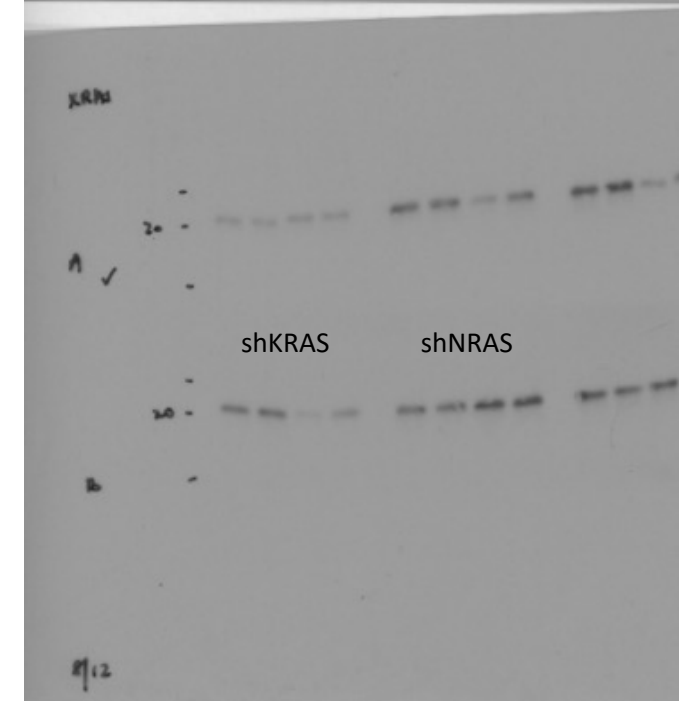

Supplement: NIHMS1868436-supplement-1868436_SD_ED_Fig6.pdf [file NIHMS1868436-supplement-1868436_SD_ED_Fig6.pdf]

Extended Data Figure 7  
Panel H

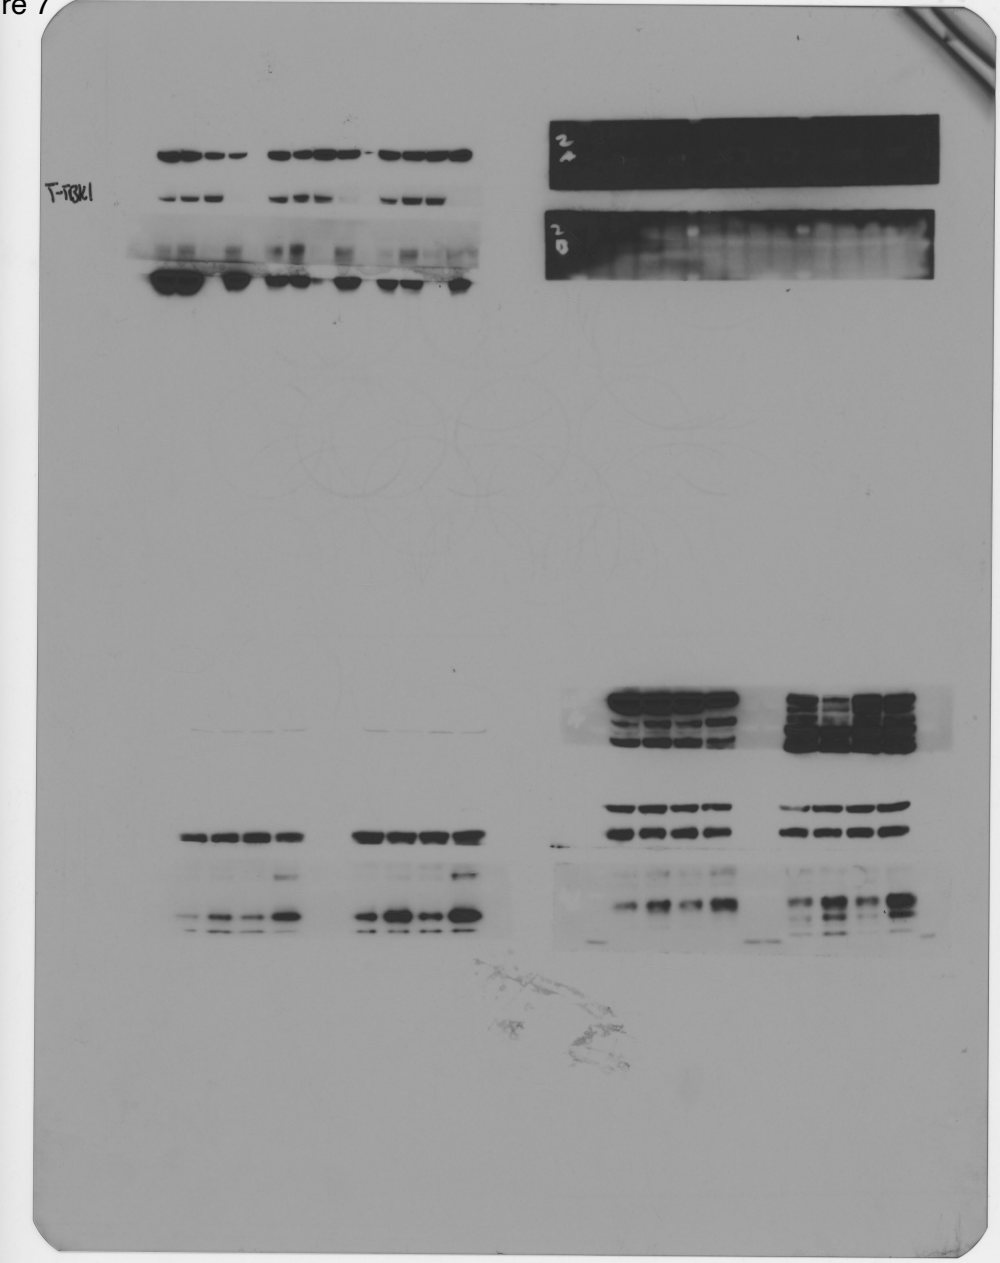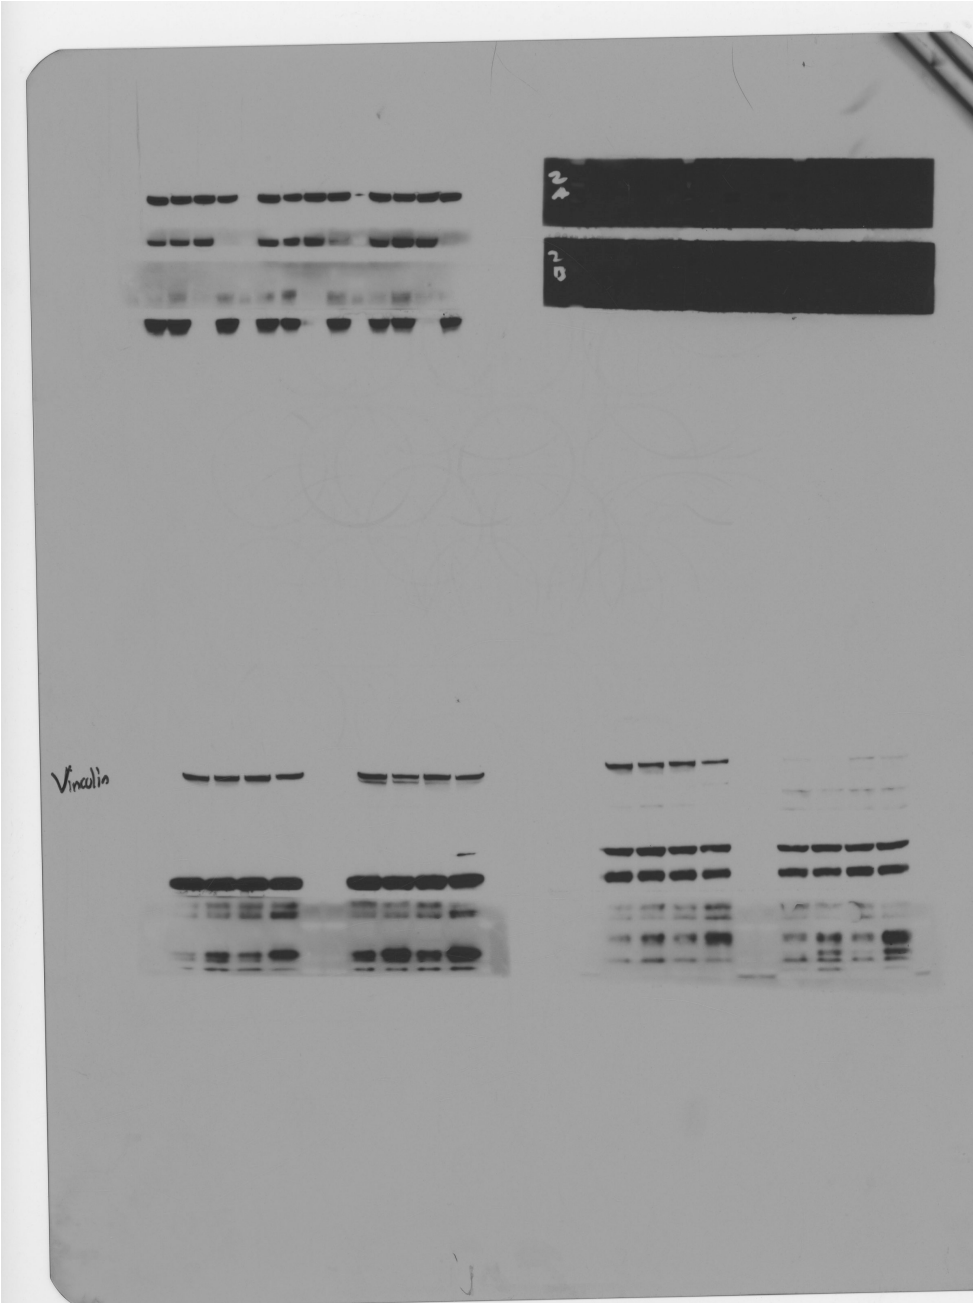

Extended Data Figure 7  
Panel J

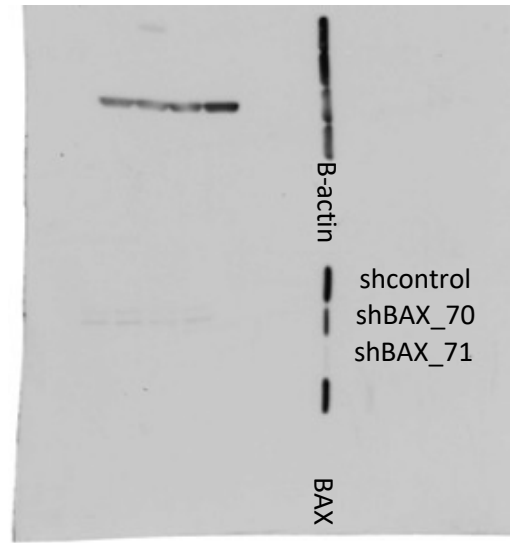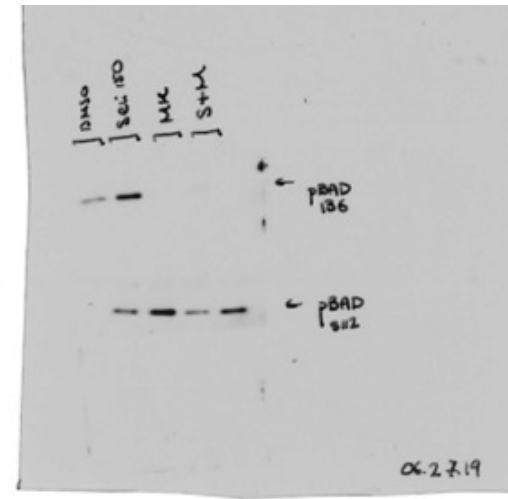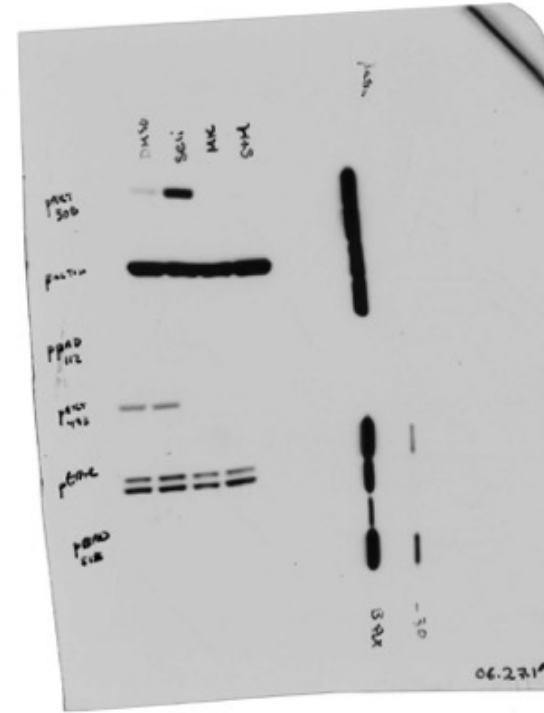

Supplement: NIHMS1868436-supplement-1868436_SD_ED_Fig7.pdf [file NIHMS1868436-supplement-1868436_SD_ED_Fig7.pdf]

Extended Data Figure 8  
Panel C

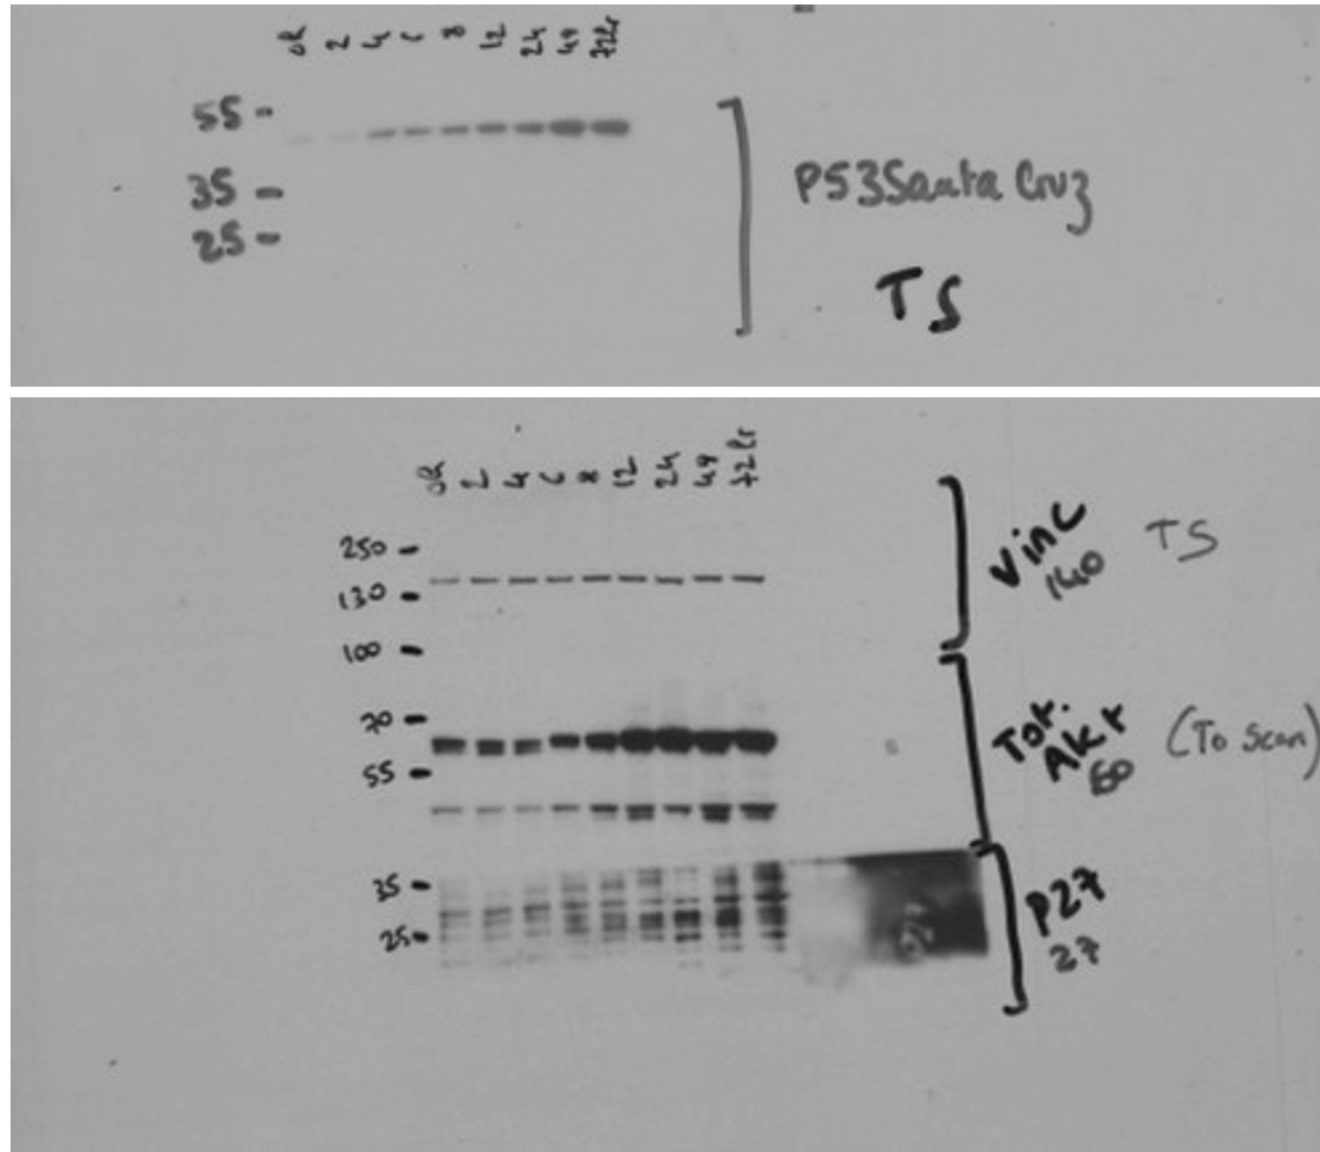

Supplement: NIHMS1868436-supplement-1868436_SD_ED_Fig8.pdf [file NIHMS1868436-supplement-1868436_SD_ED_Fig8.pdf]

Extended Figure 1  
Panel G

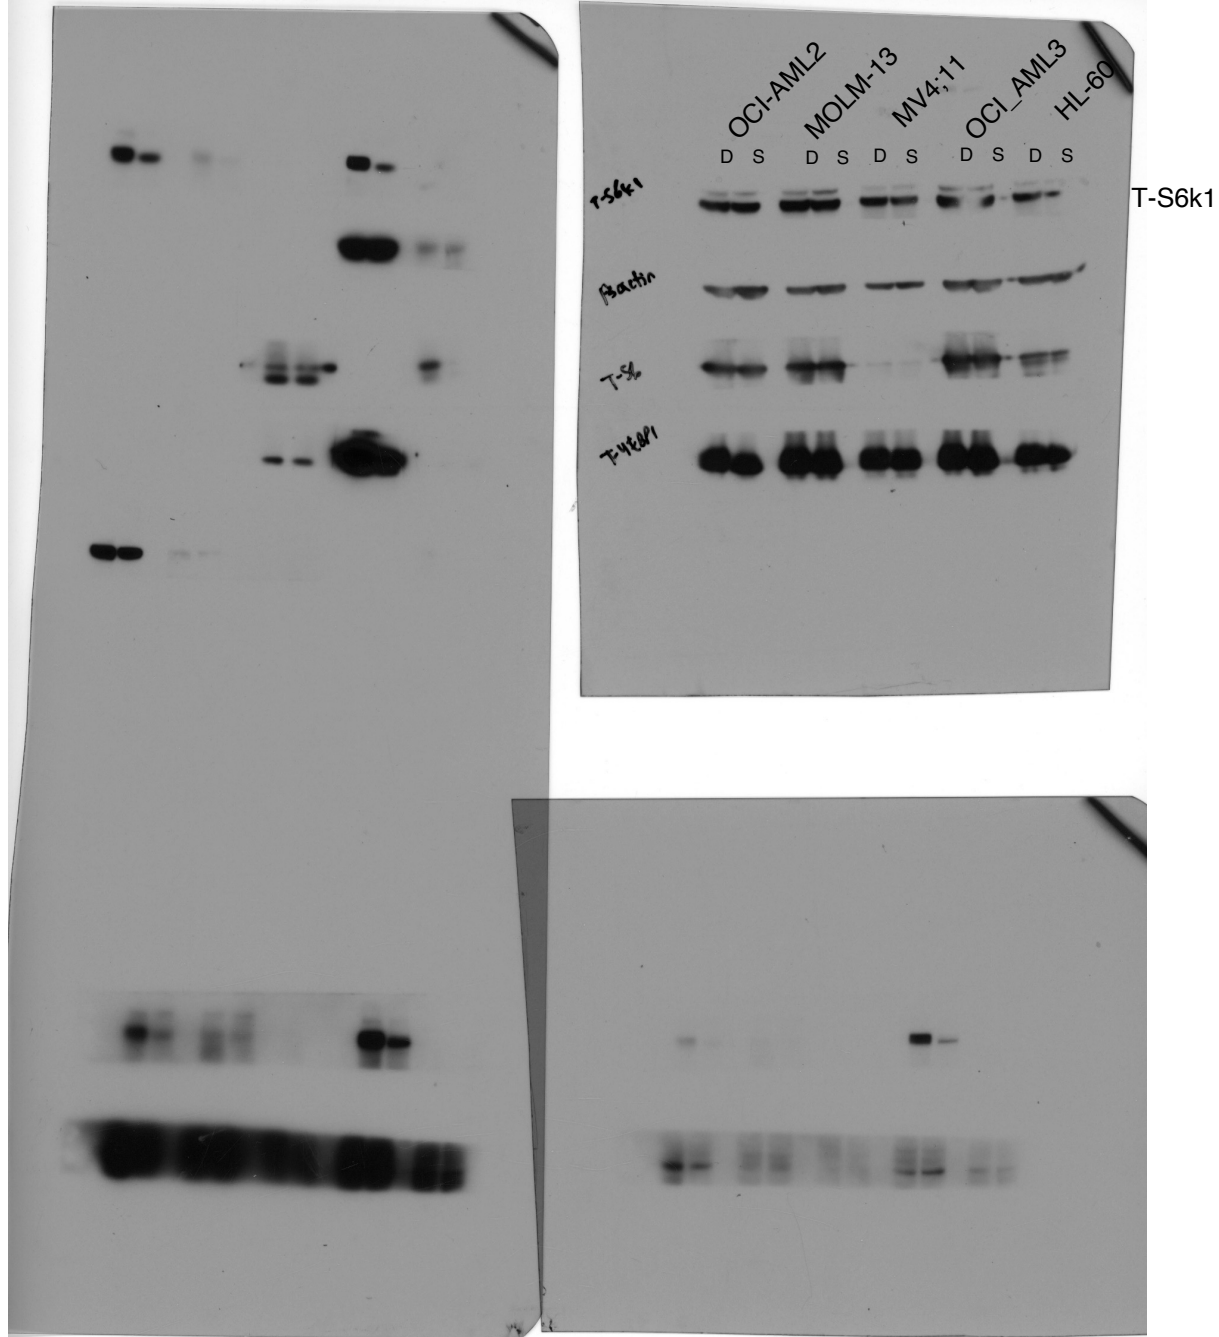

Panel G

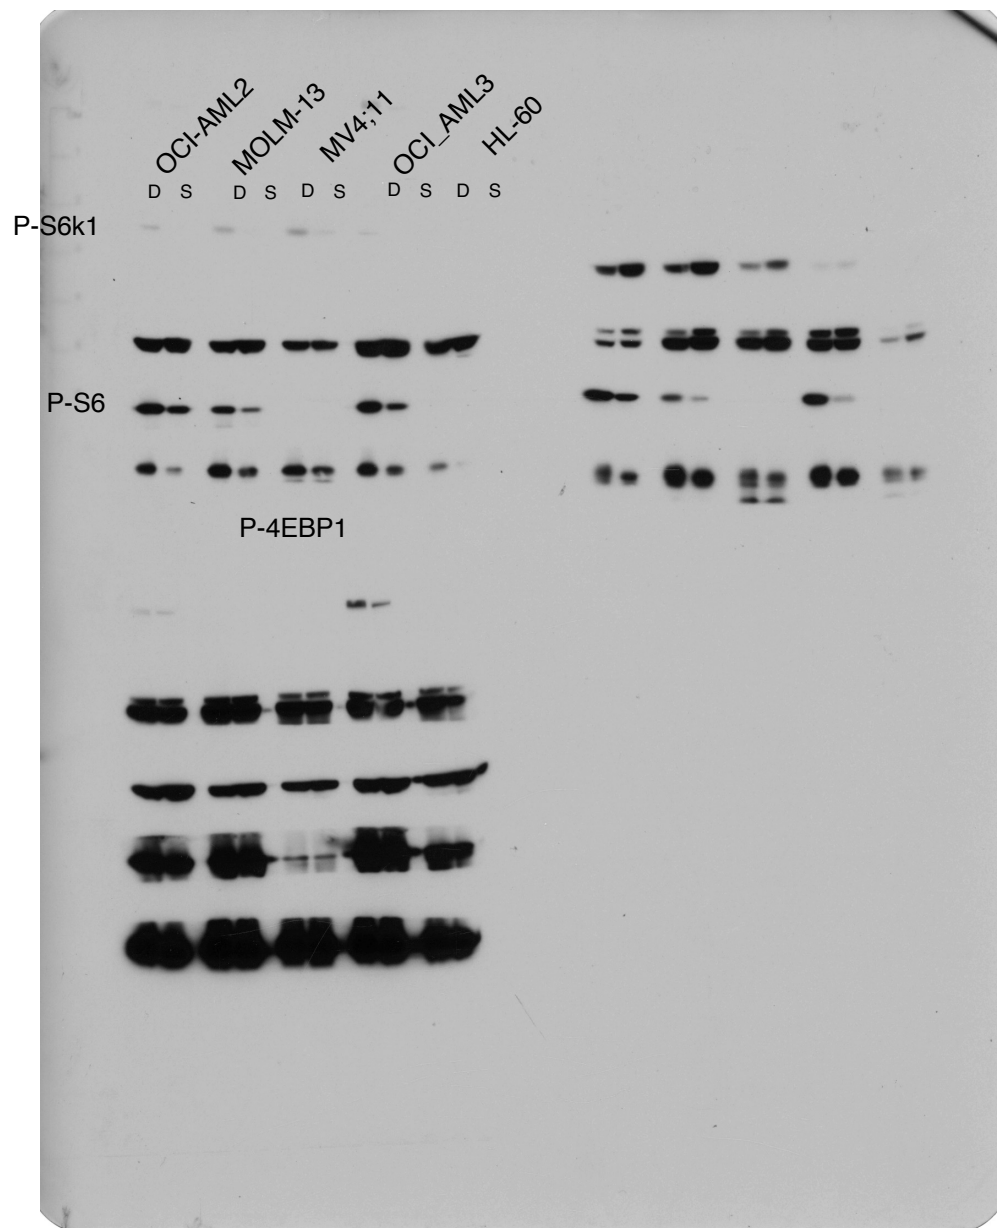

Supplement: NIHMS1868436-supplement-1868436_SD_ED_Fig_1.pdf [file NIHMS1868436-supplement-1868436_SD_ED_Fig_1.pdf]

Figure 5  
Panel C

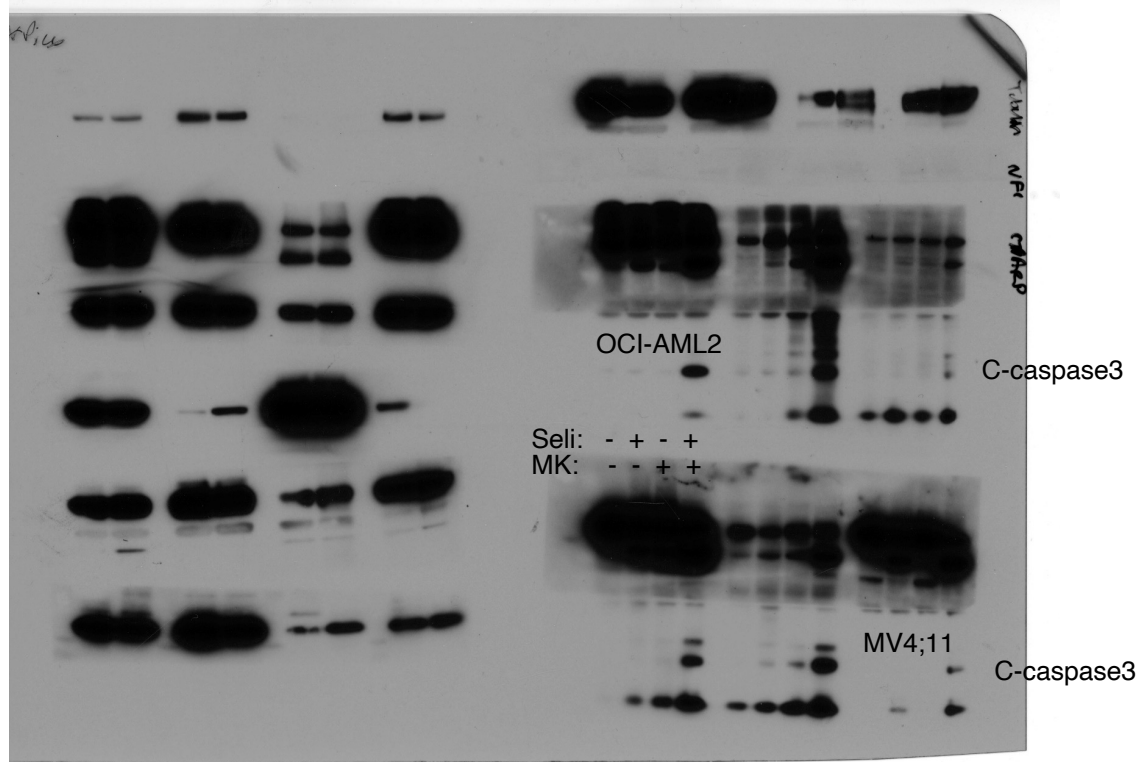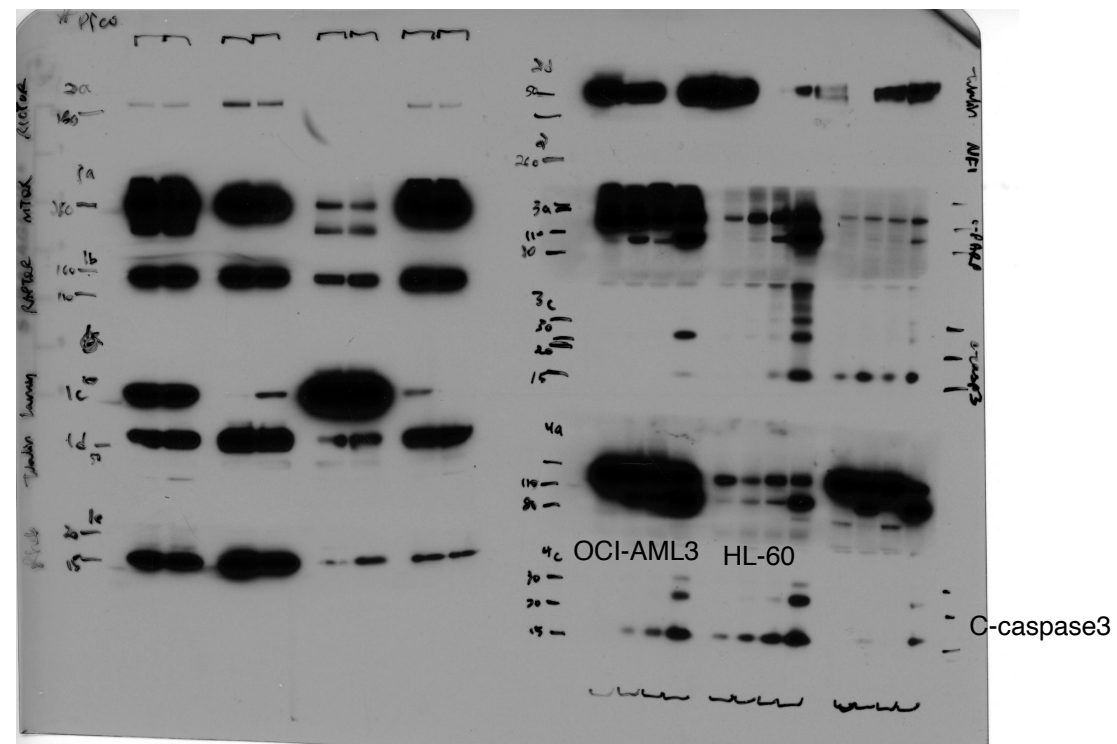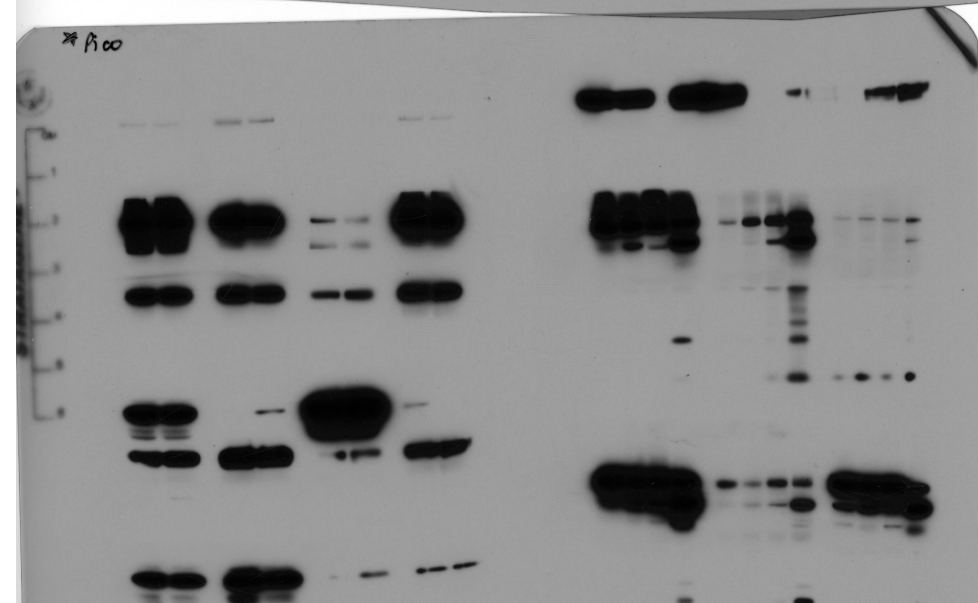

Panel C

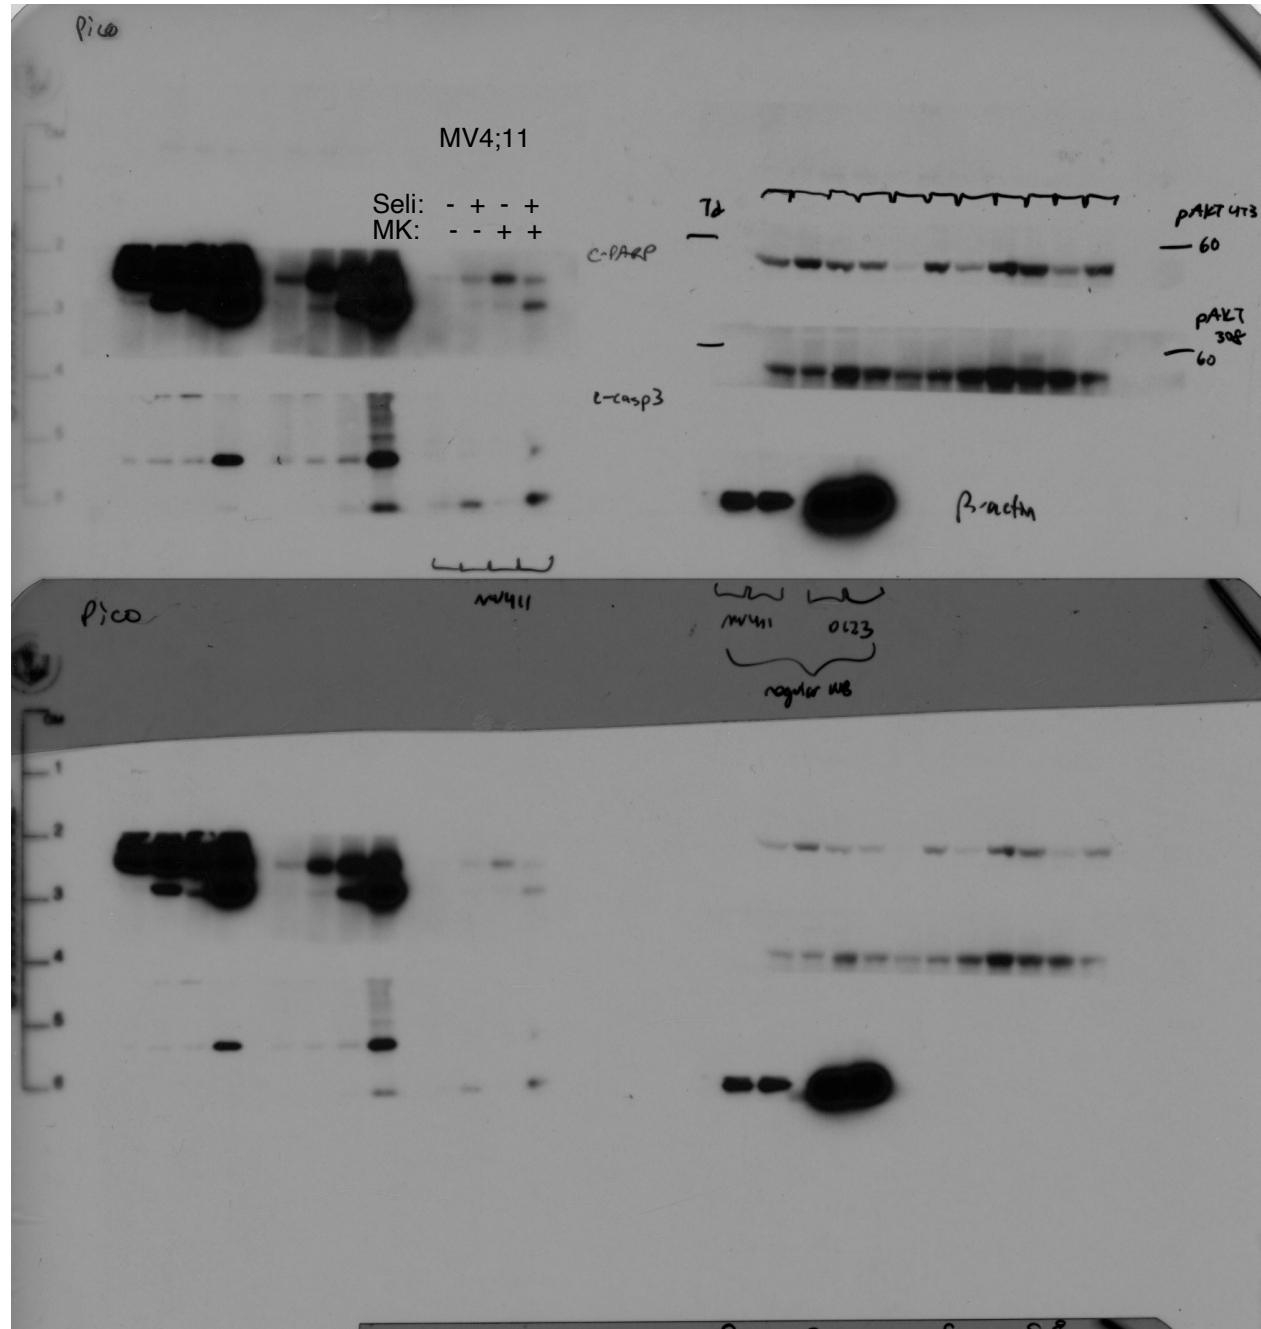

Panel C

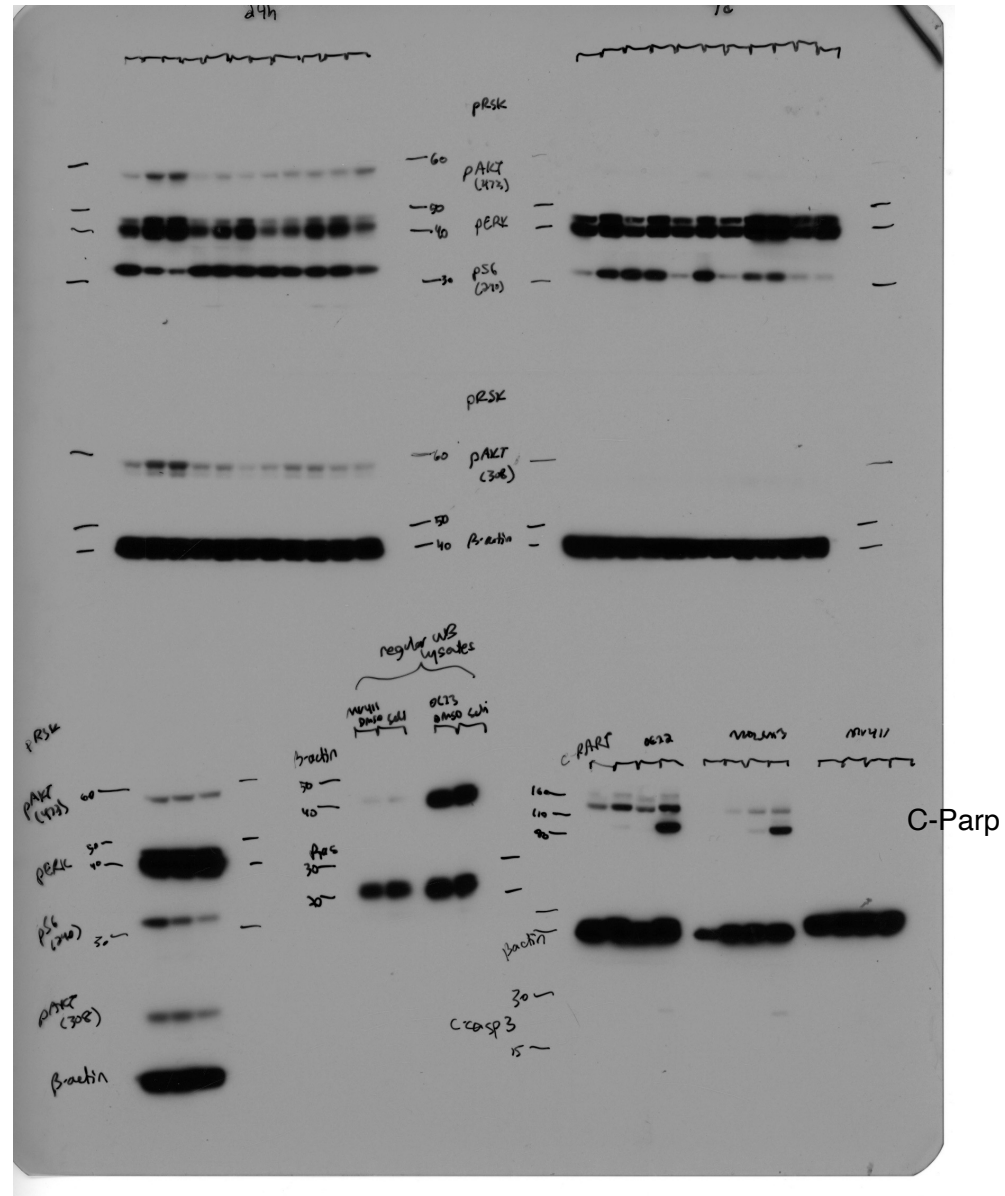

Panel C

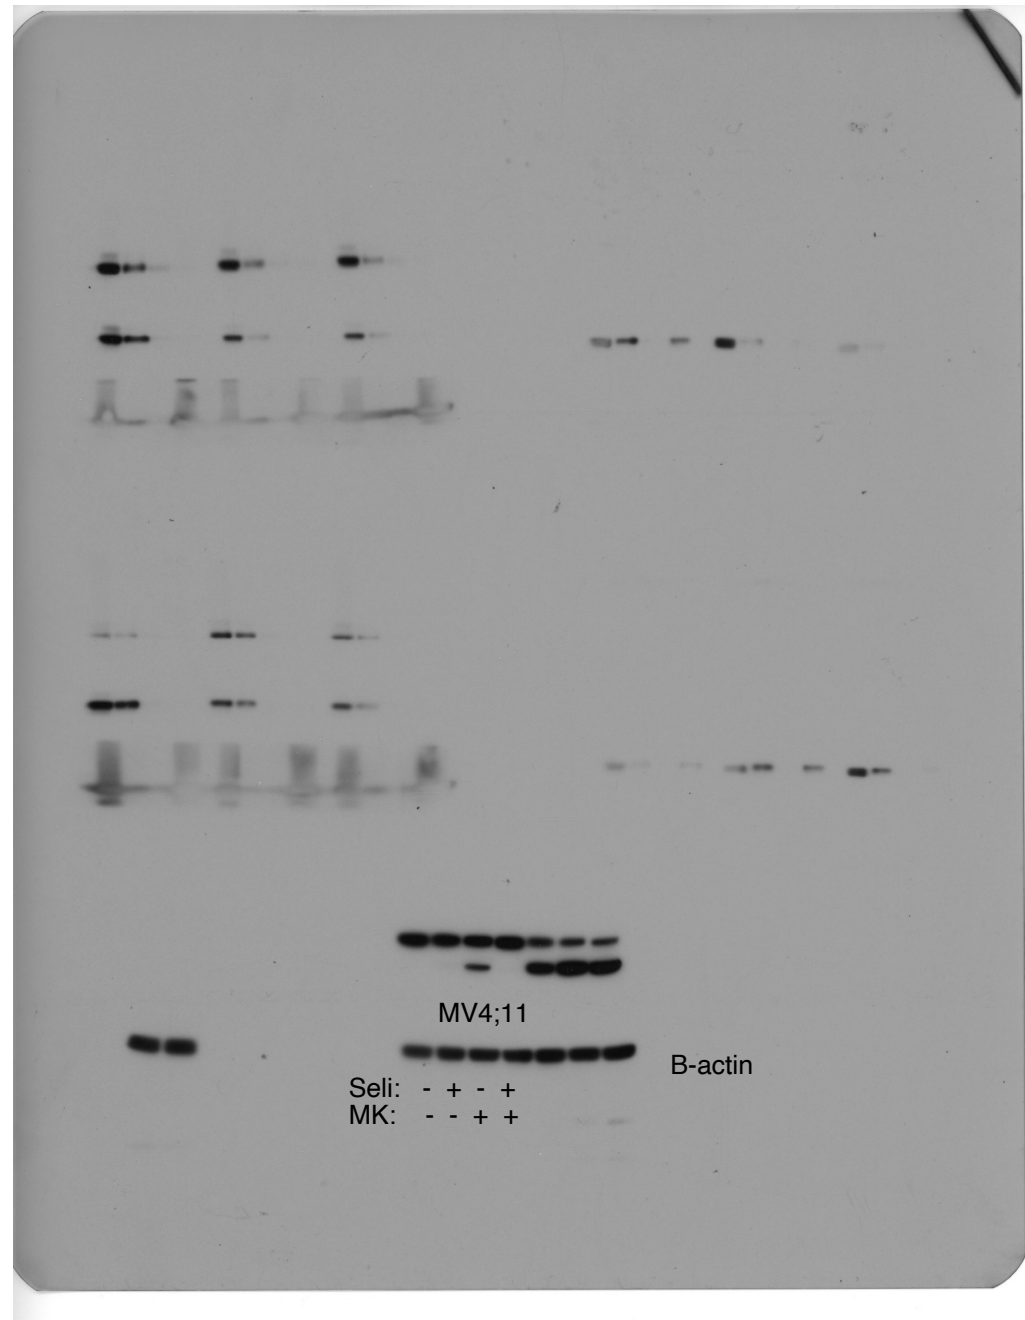

Panel C

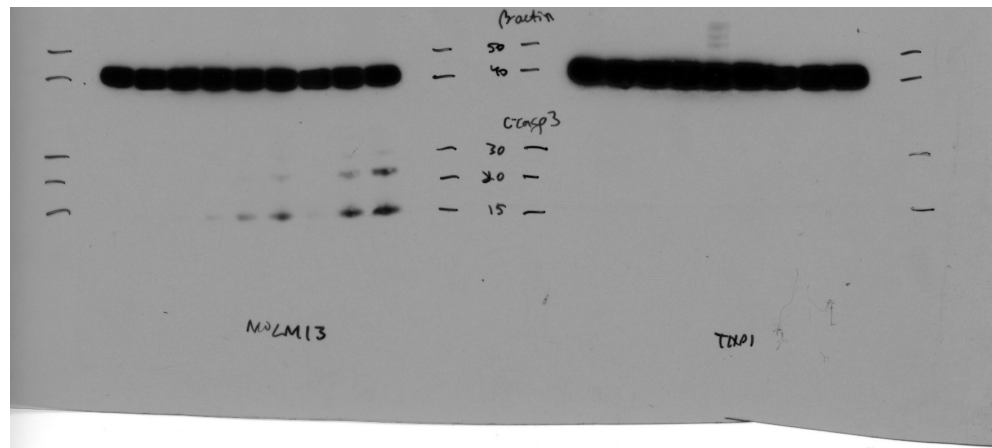

Panel F

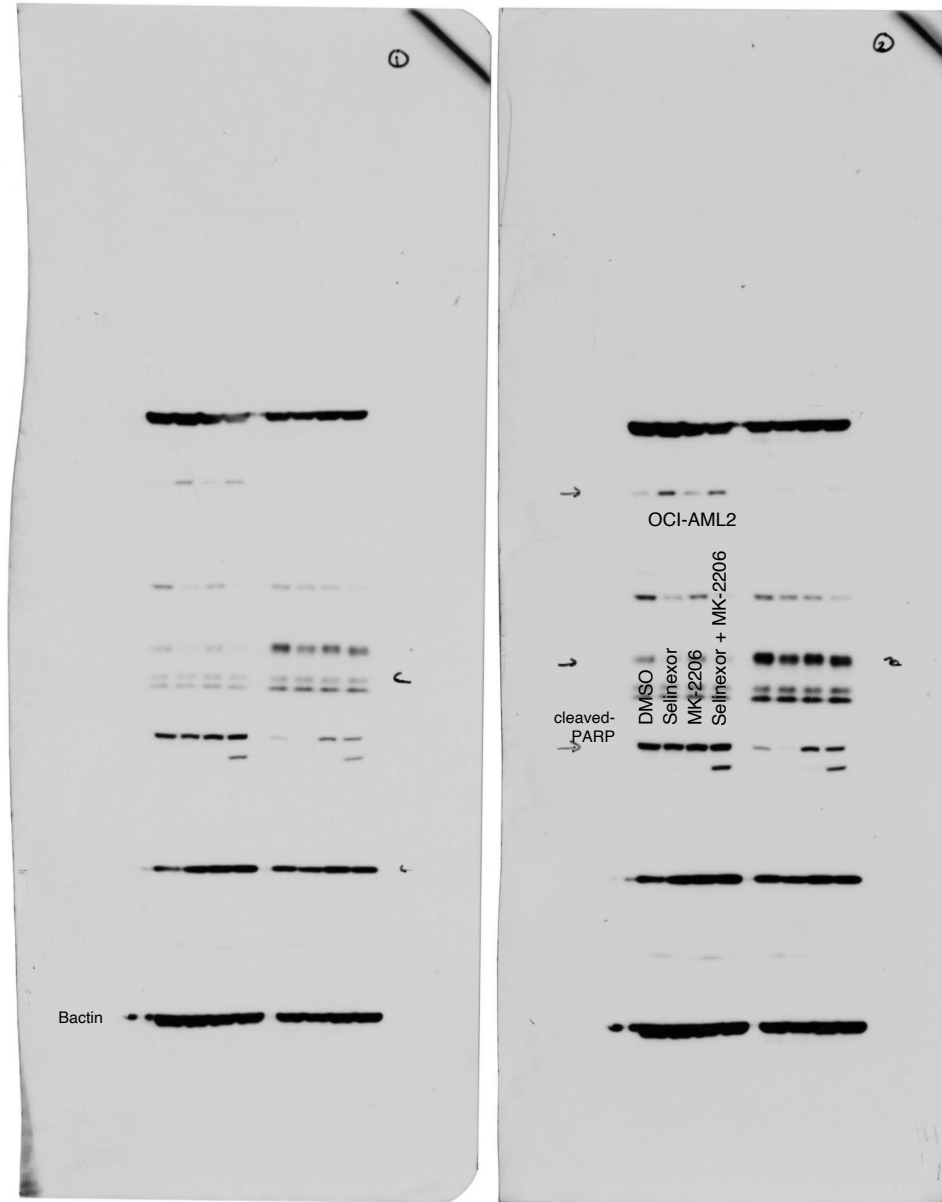

Panel F

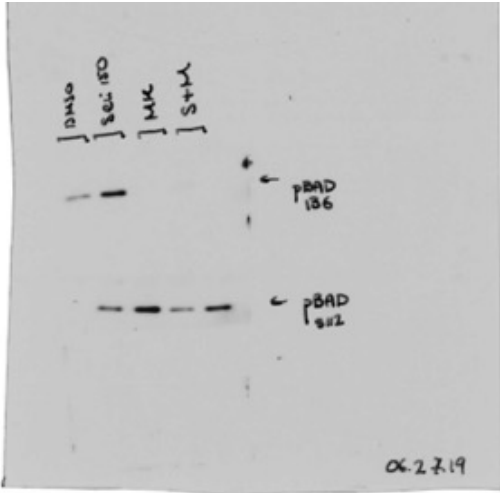

Supplement: NIHMS1868436-supplement-1868436_SD_Fig5.pdf [file NIHMS1868436-supplement-1868436_SD_Fig5.pdf]
